# Supplementary material
Source: publisher figshare collection journal article supplement (https://acs.figshare.com/ndownloader/files/4403356)
Supplement: Supplementary file 1 [file 4403356]

data_complex 1
  
_audit_creation_method            SHELXL-97 
_chemical_name_systematic 
; 
 ? 
; 
_chemical_name_common             ? 
_chemical_melting_point           ? 
_chemical_formula_moiety          ? 
_chemical_formula_sum 
 'C76.25 H89.75 Cr2 N4 P4' 
_chemical_formula_weight          1290.15 
  
loop_ 
 _atom_type_symbol 
 _atom_type_description 
 _atom_type_scat_dispersion_real 
 _atom_type_scat_dispersion_imag 
 _atom_type_scat_source 
 'C'  'C'   0.0033   0.0016 
 'International Tables Vol C Tables 4.2.6.8 and 6.1.1.4' 
 'H'  'H'   0.0000   0.0000 
 'International Tables Vol C Tables 4.2.6.8 and 6.1.1.4' 
 'N'  'N'   0.0061   0.0033 
 'International Tables Vol C Tables 4.2.6.8 and 6.1.1.4' 
 'P'  'P'   0.1023   0.0942 
 'International Tables Vol C Tables 4.2.6.8 and 6.1.1.4' 
 'Cr'  'Cr'   0.3209   0.6236 
 'International Tables Vol C Tables 4.2.6.8 and 6.1.1.4' 
  
_symmetry_cell_setting            Monoclinic 
_symmetry_space_group_name_H-M    P2(1)/c 
  
loop_ 
 _symmetry_equiv_pos_as_xyz 
 'x, y, z' 
 '-x, y+1/2, -z+1/2' 
 '-x, -y, -z' 
 'x, -y-1/2, z-1/2' 
  
_cell_length_a                    20.633(3) 
_cell_length_b                    16.034(2) 
_cell_length_c                    21.309(3) 
_cell_angle_alpha                 90.00 
_cell_angle_beta                  105.518(2) 
_cell_angle_gamma                 90.00 
_cell_volume                      6792.4(14) 
_cell_formula_units_Z             4 
_cell_measurement_temperature     200(2) 
_cell_measurement_reflns_used     9769 
_cell_measurement_theta_min       2.35 
_cell_measurement_theta_max       22.45 
  
_exptl_crystal_description        Block 
_exptl_crystal_colour             green 
_exptl_crystal_size_max           0.20 
_exptl_crystal_size_mid           0.10 
_exptl_crystal_size_min           0.10 
_exptl_crystal_density_meas       ? 
_exptl_crystal_density_diffrn     1.262 
_exptl_crystal_density_method     'not measured' 
_exptl_crystal_F_000              2733 
_exptl_absorpt_coefficient_mu     0.460 
_exptl_absorpt_correction_type    multi-scan 
_exptl_absorpt_correction_T_min   0.9136 
_exptl_absorpt_correction_T_max   0.9554 
_exptl_absorpt_process_details    'SADABS, Bruker (2003)' 
  
_exptl_special_details 
; 
 Data collection is performed with three batch runs at phi = 0.00 deg 
 (650 frames), at phi = 120.00 deg (650 frames), and at phi = 240.00 deg 
 (650 frames). 
 Frame width = 0.30 deg in omega. 
 Data is merged, corrected for decay (if any), and treated with multi-scan 
 absorption corrections (if required). All symmetry-equivalent reflections 
 are merged for centrosymmetric data. 
 Friedel pairs are not merged for noncentrosymmetric data. 
; 
  
_diffrn_ambient_temperature       200(2) 
_diffrn_radiation_wavelength      0.71073 
_diffrn_radiation_type            MoK\a 
_diffrn_radiation_source          'fine-focus sealed tube' 
_diffrn_radiation_monochromator   graphite 
_diffrn_measurement_device_type   'Bruker APEX-II CCD' 
_diffrn_measurement_method        '\f and \w scans' 
_diffrn_detector_area_resol_mean  ? 
_diffrn_reflns_number             66264 
_diffrn_reflns_av_R_equivalents   0.1010 
_diffrn_reflns_av_sigmaI/netI     0.0758 
_diffrn_reflns_limit_h_min        -24 
_diffrn_reflns_limit_h_max        24 
_diffrn_reflns_limit_k_min        -18 
_diffrn_reflns_limit_k_max        18 
_diffrn_reflns_limit_l_min        -25 
_diffrn_reflns_limit_l_max        25 
_diffrn_reflns_theta_min          1.61 
_diffrn_reflns_theta_max          24.80 
_reflns_number_total              11597 
_reflns_number_gt                 7699 
_reflns_threshold_expression      >2sigma(I) 
  
_computing_data_collection        'APEX II, Bruker (2009)' 
_computing_cell_refinement        'APEX II, Bruker (2009)' 
_computing_data_reduction         'XPREP, Bruker (2009)' 
_computing_structure_solution     'SHELXS-97 (Sheldrick, 2008)' 
_computing_structure_refinement   'SHELXL-97 (Sheldrick, 2008)' 
_computing_molecular_graphics     'SHELXTL, Bruker (2004)' 
_computing_publication_material   'SHELXTL, Bruker (2004)' 
  
_refine_special_details 
; 
 Refinement of F^2^ against ALL reflections.  The weighted R-factor wR and 
 goodness of fit S are based on F^2^, conventional R-factors R are based 
 on F, with F set to zero for negative F^2^. The threshold expression of 
 F^2^ > 2sigma(F^2^) is used only for calculating R-factors(gt) etc. and is 
 not relevant to the choice of reflections for refinement.  R-factors based 
 on F^2^ are statistically about twice as large as those based on F, and R- 
 factors based on ALL data will be even larger. 
; 
  
_refine_ls_structure_factor_coef  Fsqd 
_refine_ls_matrix_type            full 
_refine_ls_weighting_scheme       calc 
_refine_ls_weighting_details 
 'calc w=1/[\s^2^(Fo^2^)+(0.0659P)^2^+6.7786P] where P=(Fo^2^+2Fc^2^)/3' 
_atom_sites_solution_primary      direct 
_atom_sites_solution_secondary    difmap 
_atom_sites_solution_hydrogens    geom 
_refine_ls_hydrogen_treatment     constr 
_refine_ls_extinction_method      none 
_refine_ls_extinction_coef        ? 
_refine_ls_number_reflns          11597 
_refine_ls_number_parameters      715 
_refine_ls_number_restraints      39 
_refine_ls_R_factor_all           0.0972 
_refine_ls_R_factor_gt            0.0548 
_refine_ls_wR_factor_ref          0.1522 
_refine_ls_wR_factor_gt           0.1304 
_refine_ls_goodness_of_fit_ref    1.031 
_refine_ls_restrained_S_all       1.031 
_refine_ls_shift/su_max           0.001 
_refine_ls_shift/su_mean          0.000 
  
loop_ 
 _atom_site_label 
 _atom_site_type_symbol 
 _atom_site_fract_x 
 _atom_site_fract_y 
 _atom_site_fract_z 
 _atom_site_U_iso_or_equiv 
 _atom_site_adp_type 
 _atom_site_occupancy 
 _atom_site_symmetry_multiplicity 
 _atom_site_calc_flag 
 _atom_site_refinement_flags 
 _atom_site_disorder_assembly 
 _atom_site_disorder_group 
Cr1 Cr 0.23012(3) 0.48737(4) 0.18994(3) 0.02270(16) Uani 1 1 d . . . 
Cr2 Cr 0.25915(3) 0.55849(4) 0.31273(3) 0.02527(17) Uani 1 1 d . . . 
N1 N 0.18439(16) 0.4029(2) 0.11706(15) 0.0283(8) Uani 1 1 d . . . 
N2 N 0.32027(16) 0.6388(2) 0.28396(16) 0.0301(8) Uani 1 1 d . . . 
N3 N 0.29973(17) 0.4517(2) 0.35447(15) 0.0320(8) Uani 1 1 d . . . 
N4 N 0.16399(16) 0.6041(2) 0.29060(15) 0.0293(8) Uani 1 1 d . . . 
P1 P 0.25666(5) 0.41643(6) 0.10214(5) 0.0276(2) Uani 1 1 d . . . 
P2 P 0.32206(5) 0.59664(6) 0.21471(5) 0.0270(2) Uani 1 1 d . . . 
P3 P 0.26848(5) 0.38688(6) 0.29318(5) 0.0267(2) Uani 1 1 d . . . 
P4 P 0.13630(5) 0.57584(6) 0.21375(5) 0.0267(2) Uani 1 1 d . . . 
C1 C 0.2532(2) 0.4622(3) 0.02282(19) 0.0312(9) Uani 1 1 d . . . 
C2 C 0.2438(2) 0.5478(3) 0.0163(2) 0.0410(11) Uani 1 1 d . . . 
H2A H 0.2401 0.5799 0.0526 0.049 Uiso 1 1 calc R . . 
C3 C 0.2396(2) 0.5875(3) -0.0431(2) 0.0516(13) Uani 1 1 d . . . 
H3A H 0.2330 0.6461 -0.0468 0.062 Uiso 1 1 calc R . . 
C4 C 0.2451(2) 0.5419(3) -0.0959(2) 0.0495(13) Uani 1 1 d . . . 
H4A H 0.2429 0.5690 -0.1361 0.059 Uiso 1 1 calc R . . 
C5 C 0.2538(2) 0.4569(3) -0.0906(2) 0.0463(12) Uani 1 1 d . . . 
H5A H 0.2568 0.4253 -0.1273 0.056 Uiso 1 1 calc R . . 
C6 C 0.2581(2) 0.4174(3) -0.03209(19) 0.0362(10) Uani 1 1 d . . . 
H6A H 0.2646 0.3587 -0.0291 0.043 Uiso 1 1 calc R . . 
C7 C 0.3065(2) 0.3221(3) 0.10364(18) 0.0325(10) Uani 1 1 d . . . 
C8 C 0.3673(2) 0.3261(3) 0.08644(18) 0.0341(10) Uani 1 1 d . . . 
H8A H 0.3797 0.3764 0.0691 0.041 Uiso 1 1 calc R . . 
C9 C 0.4094(2) 0.2582(3) 0.0943(2) 0.0491(13) Uani 1 1 d . . . 
H9A H 0.4507 0.2621 0.0828 0.059 Uiso 1 1 calc R . . 
C10 C 0.3920(3) 0.1853(3) 0.1185(2) 0.0556(14) Uani 1 1 d . . . 
H10A H 0.4212 0.1385 0.1235 0.067 Uiso 1 1 calc R . . 
C11 C 0.3330(3) 0.1793(3) 0.1356(2) 0.0542(14) Uani 1 1 d . . . 
H11A H 0.3213 0.1281 0.1522 0.065 Uiso 1 1 calc R . . 
C12 C 0.2894(3) 0.2476(3) 0.1291(2) 0.0435(11) Uani 1 1 d . . . 
H12A H 0.2488 0.2433 0.1419 0.052 Uiso 1 1 calc R . . 
C13 C 0.1210(2) 0.3648(3) 0.07510(19) 0.0331(10) Uani 1 1 d . . . 
C14 C 0.1337(2) 0.3085(3) 0.0229(2) 0.0492(12) Uani 1 1 d . . . 
H14A H 0.1644 0.2636 0.0432 0.074 Uiso 1 1 calc R . . 
H14B H 0.1539 0.3409 -0.0060 0.074 Uiso 1 1 calc R . . 
H14C H 0.0911 0.2845 -0.0024 0.074 Uiso 1 1 calc R . . 
C15 C 0.0739(2) 0.4342(3) 0.0416(2) 0.0500(13) Uani 1 1 d . . . 
H15A H 0.0952 0.4660 0.0133 0.075 Uiso 1 1 calc R . . 
H15B H 0.0644 0.4714 0.0746 0.075 Uiso 1 1 calc R . . 
H15C H 0.0318 0.4098 0.0154 0.075 Uiso 1 1 calc R . . 
C16 C 0.0877(2) 0.3151(3) 0.1186(2) 0.0473(12) Uani 1 1 d . . . 
H16A H 0.1182 0.2709 0.1406 0.071 Uiso 1 1 calc R . . 
H16B H 0.0460 0.2902 0.0920 0.071 Uiso 1 1 calc R . . 
H16C H 0.0774 0.3522 0.1512 0.071 Uiso 1 1 calc R . . 
C17 C 0.3211(2) 0.6781(3) 0.15259(19) 0.0321(10) Uani 1 1 d . . . 
C18 C 0.2620(2) 0.7212(3) 0.1273(2) 0.0469(12) Uani 1 1 d . . . 
H18A H 0.2232 0.7069 0.1409 0.056 Uiso 1 1 calc R . . 
C19 C 0.2578(3) 0.7848(4) 0.0826(3) 0.0660(16) Uani 1 1 d . . . 
H19A H 0.2162 0.8127 0.0655 0.079 Uiso 1 1 calc R . . 
C20 C 0.3122(3) 0.8076(4) 0.0630(3) 0.0726(17) Uani 1 1 d . . . 
H20A H 0.3092 0.8515 0.0324 0.087 Uiso 1 1 calc R . . 
C21 C 0.3720(3) 0.7667(4) 0.0877(3) 0.0746(18) Uani 1 1 d . . . 
H21A H 0.4107 0.7828 0.0744 0.090 Uiso 1 1 calc R . . 
C22 C 0.3763(2) 0.7025(3) 0.1315(3) 0.0537(14) Uani 1 1 d . . . 
H22A H 0.4179 0.6743 0.1477 0.064 Uiso 1 1 calc R . . 
C23 C 0.40448(19) 0.5481(2) 0.22127(19) 0.0290(9) Uani 1 1 d . . . 
C24 C 0.4221(2) 0.5167(3) 0.1666(2) 0.0382(10) Uani 1 1 d . . . 
H24A H 0.3918 0.5229 0.1246 0.046 Uiso 1 1 calc R . . 
C25 C 0.4831(2) 0.4770(3) 0.1732(2) 0.0456(12) Uani 1 1 d . . . 
H25A H 0.4947 0.4570 0.1356 0.055 Uiso 1 1 calc R . . 
C26 C 0.5273(2) 0.4663(3) 0.2340(3) 0.0508(13) Uani 1 1 d . . . 
H26A H 0.5693 0.4392 0.2383 0.061 Uiso 1 1 calc R . . 
C27 C 0.5103(2) 0.4950(3) 0.2881(3) 0.0477(12) Uani 1 1 d . . . 
H27A H 0.5402 0.4869 0.3301 0.057 Uiso 1 1 calc R . . 
C28 C 0.4497(2) 0.5358(3) 0.2818(2) 0.0371(10) Uani 1 1 d . . . 
H28A H 0.4388 0.5558 0.3197 0.044 Uiso 1 1 calc R . . 
C29 C 0.3507(2) 0.7184(3) 0.3151(2) 0.0356(10) Uani 1 1 d . . . 
C30 C 0.4170(2) 0.7410(3) 0.3002(3) 0.0552(14) Uani 1 1 d . . . 
H30A H 0.4092 0.7490 0.2531 0.083 Uiso 1 1 calc R . . 
H30B H 0.4496 0.6959 0.3149 0.083 Uiso 1 1 calc R . . 
H30C H 0.4347 0.7927 0.3229 0.083 Uiso 1 1 calc R . . 
C31 C 0.3015(2) 0.7906(3) 0.2922(2) 0.0498(12) Uani 1 1 d . . . 
H31A H 0.2935 0.7980 0.2451 0.075 Uiso 1 1 calc R . . 
H31B H 0.3207 0.8419 0.3147 0.075 Uiso 1 1 calc R . . 
H31C H 0.2589 0.7782 0.3023 0.075 Uiso 1 1 calc R . . 
C32 C 0.3638(3) 0.7067(3) 0.3887(2) 0.0573(14) Uani 1 1 d . . . 
H32A H 0.3216 0.6923 0.3989 0.086 Uiso 1 1 calc R . . 
H32B H 0.3815 0.7587 0.4109 0.086 Uiso 1 1 calc R . . 
H32C H 0.3965 0.6618 0.4033 0.086 Uiso 1 1 calc R . . 
C33 C 0.33075(19) 0.3051(2) 0.29014(18) 0.0275(9) Uani 1 1 d . . . 
C34 C 0.3855(2) 0.3292(2) 0.26819(19) 0.0317(9) Uani 1 1 d . . . 
H34A H 0.3877 0.3846 0.2531 0.038 Uiso 1 1 calc R . . 
C35 C 0.4367(2) 0.2742(3) 0.2679(2) 0.0405(11) Uani 1 1 d . . . 
H35A H 0.4742 0.2924 0.2536 0.049 Uiso 1 1 calc R . . 
C36 C 0.4341(2) 0.1932(3) 0.2883(2) 0.0415(11) Uani 1 1 d . . . 
H36A H 0.4695 0.1555 0.2882 0.050 Uiso 1 1 calc R . . 
C37 C 0.3792(2) 0.1673(3) 0.3090(2) 0.0426(11) Uani 1 1 d . . . 
H37A H 0.3764 0.1112 0.3224 0.051 Uiso 1 1 calc R . . 
C38 C 0.3286(2) 0.2227(3) 0.3101(2) 0.0363(10) Uani 1 1 d . . . 
H38A H 0.2914 0.2044 0.3248 0.044 Uiso 1 1 calc R . . 
C39 C 0.2009(2) 0.3257(2) 0.31275(19) 0.0320(10) Uani 1 1 d . . . 
C40 C 0.1712(2) 0.2577(3) 0.2764(2) 0.0398(11) Uani 1 1 d . . . 
H40A H 0.1881 0.2387 0.2416 0.048 Uiso 1 1 calc R . . 
C41 C 0.1175(2) 0.2169(3) 0.2897(3) 0.0520(13) Uani 1 1 d . . . 
H41A H 0.0983 0.1699 0.2643 0.062 Uiso 1 1 calc R . . 
C42 C 0.0915(3) 0.2438(3) 0.3396(3) 0.0602(15) Uani 1 1 d . . . 
H42A H 0.0544 0.2158 0.3484 0.072 Uiso 1 1 calc R . . 
C43 C 0.1199(3) 0.3119(3) 0.3763(3) 0.0580(14) Uani 1 1 d . . . 
H43A H 0.1029 0.3307 0.4111 0.070 Uiso 1 1 calc R . . 
C44 C 0.1732(2) 0.3523(3) 0.3622(2) 0.0431(11) Uani 1 1 d . . . 
H44A H 0.1918 0.3999 0.3871 0.052 Uiso 1 1 calc R . . 
C45 C 0.3429(2) 0.4318(3) 0.4208(2) 0.0426(11) Uani 1 1 d . . . 
C46 C 0.3341(4) 0.3433(3) 0.4440(2) 0.088(2) Uani 1 1 d . . . 
H46A H 0.2869 0.3344 0.4433 0.132 Uiso 1 1 calc R . . 
H46B H 0.3625 0.3359 0.4886 0.132 Uiso 1 1 calc R . . 
H46C H 0.3473 0.3029 0.4152 0.132 Uiso 1 1 calc R . . 
C47 C 0.3256(3) 0.4928(3) 0.4682(2) 0.0564(14) Uani 1 1 d . . . 
H47A H 0.2785 0.4851 0.4685 0.085 Uiso 1 1 calc R . . 
H47B H 0.3321 0.5499 0.4548 0.085 Uiso 1 1 calc R . . 
H47C H 0.3549 0.4827 0.5120 0.085 Uiso 1 1 calc R . . 
C48 C 0.4163(3) 0.4450(4) 0.4226(2) 0.0785(19) Uani 1 1 d . . . 
H48A H 0.4224 0.5016 0.4079 0.118 Uiso 1 1 calc R . . 
H48B H 0.4295 0.4044 0.3939 0.118 Uiso 1 1 calc R . . 
H48C H 0.4443 0.4374 0.4673 0.118 Uiso 1 1 calc R . . 
C49 C 0.0548(2) 0.5221(2) 0.2001(2) 0.0308(9) Uani 1 1 d . . . 
C50 C 0.0518(2) 0.4537(3) 0.2397(2) 0.0397(11) Uani 1 1 d . . . 
H50A H 0.0915 0.4364 0.2712 0.048 Uiso 1 1 calc R . . 
C51 C -0.0071(2) 0.4106(3) 0.2345(3) 0.0515(13) Uani 1 1 d . . . 
H51A H -0.0080 0.3646 0.2623 0.062 Uiso 1 1 calc R . . 
C52 C -0.0648(2) 0.4350(3) 0.1885(3) 0.0534(13) Uani 1 1 d . . . 
H52A H -0.1057 0.4057 0.1847 0.064 Uiso 1 1 calc R . . 
C53 C -0.0633(2) 0.5010(3) 0.1482(3) 0.0488(12) Uani 1 1 d . . . 
H53A H -0.1030 0.5171 0.1163 0.059 Uiso 1 1 calc R . . 
C54 C -0.0043(2) 0.5440(3) 0.1542(2) 0.0389(11) Uani 1 1 d . . . 
H54A H -0.0039 0.5900 0.1262 0.047 Uiso 1 1 calc R . . 
C55 C 0.11174(19) 0.6666(3) 0.1595(2) 0.0330(10) Uani 1 1 d . . . 
C56 C 0.0957(3) 0.6565(3) 0.0925(2) 0.0567(14) Uani 1 1 d . . . 
H56A H 0.0965 0.6024 0.0745 0.068 Uiso 1 1 calc R . . 
C57 C 0.0783(3) 0.7257(5) 0.0508(3) 0.080(2) Uani 1 1 d . . . 
H57A H 0.0661 0.7180 0.0049 0.096 Uiso 1 1 calc R . . 
C58 C 0.0789(3) 0.8038(4) 0.0760(4) 0.079(2) Uani 1 1 d . . . 
H58A H 0.0666 0.8504 0.0477 0.095 Uiso 1 1 calc R . . 
C59 C 0.0971(3) 0.8152(3) 0.1415(4) 0.0753(19) Uani 1 1 d . . . 
H59A H 0.0989 0.8699 0.1589 0.090 Uiso 1 1 calc R . . 
C60 C 0.1129(2) 0.7479(3) 0.1828(3) 0.0496(13) Uani 1 1 d . . . 
H60A H 0.1250 0.7571 0.2285 0.060 Uiso 1 1 calc R . . 
C61 C 0.1265(2) 0.6375(3) 0.3368(2) 0.0378(10) Uani 1 1 d . . . 
C62 C 0.0529(2) 0.6611(3) 0.3061(2) 0.0464(12) Uani 1 1 d . . . 
H62A H 0.0505 0.7031 0.2721 0.070 Uiso 1 1 calc R . . 
H62B H 0.0335 0.6839 0.3397 0.070 Uiso 1 1 calc R . . 
H62C H 0.0276 0.6114 0.2869 0.070 Uiso 1 1 calc R . . 
C63 C 0.1631(3) 0.7147(3) 0.3707(3) 0.0577(14) Uani 1 1 d . . . 
H63A H 0.1625 0.7582 0.3383 0.087 Uiso 1 1 calc R . . 
H63B H 0.2098 0.7002 0.3929 0.087 Uiso 1 1 calc R . . 
H63C H 0.1405 0.7351 0.4027 0.087 Uiso 1 1 calc R . . 
C64 C 0.1287(3) 0.5721(3) 0.3895(2) 0.0605(15) Uani 1 1 d . . . 
H64A H 0.1058 0.5213 0.3695 0.091 Uiso 1 1 calc R . . 
H64B H 0.1060 0.5939 0.4210 0.091 Uiso 1 1 calc R . . 
H64C H 0.1756 0.5591 0.4119 0.091 Uiso 1 1 calc R . . 
C65 C 0.1704(3) 0.0276(5) 0.1525(3) 0.102(3) Uiso 0.75 1 d PGU A 1 
C66 C 0.1034(4) 0.0458(4) 0.1478(3) 0.096(3) Uiso 0.75 1 d PGU A 1 
H66A H 0.0875 0.0458 0.1857 0.115 Uiso 0.75 1 calc PR A 1 
C67 C 0.0596(3) 0.0641(5) 0.0875(4) 0.113(3) Uiso 0.75 1 d PGU A 1 
H67A H 0.0138 0.0765 0.0842 0.136 Uiso 0.75 1 calc PR A 1 
C68 C 0.0827(3) 0.0641(6) 0.0319(3) 0.106(5) Uiso 0.75 1 d PGU A 1 
H68A H 0.0528 0.0766 -0.0093 0.128 Uiso 0.50 1 calc PR A 1 
C69 C 0.1498(3) 0.0459(5) 0.0367(3) 0.098(3) Uiso 0.75 1 d PGU A 1 
H69A H 0.1656 0.0460 -0.0012 0.117 Uiso 0.75 1 calc PR A 1 
C70 C 0.1936(3) 0.0276(5) 0.0970(3) 0.087(3) Uiso 0.75 1 d PGU A 1 
H70A H 0.2394 0.0152 0.1002 0.104 Uiso 0.75 1 calc PR A 1 
C71 C 0.2176(13) 0.0058(17) 0.2169(11) 0.246(10) Uiso 0.75 1 d PU A 1 
H71A H 0.1937 0.0085 0.2509 0.369 Uiso 0.75 1 calc PR A 1 
H71B H 0.2552 0.0454 0.2271 0.369 Uiso 0.75 1 calc PR A 1 
H71C H 0.2350 -0.0508 0.2150 0.369 Uiso 0.75 1 calc PR A 1 
C72 C 0.1394(6) 0.0387(8) 0.1004(5) 0.132(6) Uiso 0.50 1 d PGU B 2 
C73 C 0.1961(7) -0.0035(8) 0.0940(5) 0.133(7) Uiso 0.50 1 d PGU B 2 
H73A H 0.2005 -0.0171 0.0519 0.160 Uiso 0.50 1 calc PR B 2 
C74 C 0.2464(5) -0.0259(7) 0.1491(7) 0.138(6) Uiso 0.50 1 d PGU B 2 
H74A H 0.2852 -0.0548 0.1447 0.165 Uiso 0.50 1 calc PR B 2 
C75 C 0.2400(6) -0.0060(8) 0.2106(5) 0.100(5) Uiso 0.50 1 d PGU B 2 
H75A H 0.2744 -0.0213 0.2483 0.120 Uiso 0.50 1 calc PR B 2 
C76 C 0.1833(6) 0.0362(8) 0.2170(5) 0.110(5) Uiso 0.50 1 d PGU B 2 
H76A H 0.1789 0.0498 0.2591 0.131 Uiso 0.50 1 calc PR B 2 
C77 C 0.1330(5) 0.0586(7) 0.1619(6) 0.105(5) Uiso 0.50 1 d PGU B 2 
H77A H 0.0943 0.0875 0.1663 0.126 Uiso 0.50 1 calc PR B 2 
C78 C 0.0847(16) 0.071(3) 0.0442(16) 0.154(19) Uiso 0.50 1 d PU B 2 
H78A H 0.0956 0.0582 0.0032 0.380 Uiso 0.50 1 calc PR B 2 
H78B H 0.0811 0.1319 0.0483 0.380 Uiso 0.50 1 calc PR B 2 
H78C H 0.0419 0.0451 0.0444 0.380 Uiso 0.50 1 calc PR B 2 
C79 C 0.4982(5) 0.9434(3) 0.5107(4) 0.074(3) Uiso 0.50 1 d PGU C -3 
C80 C 0.5605(4) 0.9819(5) 0.5210(4) 0.044(3) Uiso 0.50 1 d PGU C -3 
H80A H 0.6005 0.9509 0.5386 0.053 Uiso 0.50 1 calc PR C -3 
C81 C 0.5644(4) 1.0656(5) 0.5057(4) 0.072(3) Uiso 0.50 1 d PGU C -3 
H81A H 0.6070 1.0919 0.5127 0.087 Uiso 0.50 1 calc PR C -3 
C82 C 0.5059(6) 1.1110(3) 0.4800(5) 0.093(6) Uiso 0.50 1 d PGU C -3 
H82A H 0.5085 1.1683 0.4696 0.112 Uiso 0.50 1 calc PR C -3 
C83 C 0.4435(4) 1.0726(5) 0.4697(4) 0.072(3) Uiso 0.50 1 d PGU C -3 
H83A H 0.4035 1.1036 0.4522 0.086 Uiso 0.50 1 calc PR C -3 
C84 C 0.4396(3) 0.9888(5) 0.4851(4) 0.052(3) Uiso 0.50 1 d PGU C -3 
H84A H 0.3970 0.9625 0.4781 0.062 Uiso 0.50 1 calc PR C -3 
C85 C 0.4951(9) 0.8574(12) 0.5276(9) 0.109(5) Uiso 0.50 1 d PU C -3 
H85A H 0.5408 0.8358 0.5450 0.164 Uiso 0.50 1 calc PR C -3 
H85B H 0.4721 0.8256 0.4888 0.164 Uiso 0.50 1 calc PR C -3 
H85C H 0.4703 0.8520 0.5607 0.164 Uiso 0.50 1 calc PR C -3 
  
loop_ 
 _atom_site_aniso_label 
 _atom_site_aniso_U_11 
 _atom_site_aniso_U_22 
 _atom_site_aniso_U_33 
 _atom_site_aniso_U_23 
 _atom_site_aniso_U_13 
 _atom_site_aniso_U_12 
Cr1 0.0218(3) 0.0226(3) 0.0233(3) -0.0008(3) 0.0053(3) -0.0022(3) 
Cr2 0.0241(3) 0.0244(3) 0.0273(3) 0.0000(3) 0.0070(3) 0.0002(3) 
N1 0.0276(18) 0.0307(19) 0.0251(17) -0.0057(14) 0.0046(14) -0.0048(15) 
N2 0.0278(18) 0.0293(19) 0.0352(19) -0.0062(15) 0.0118(15) -0.0077(15) 
N3 0.039(2) 0.0318(19) 0.0238(17) 0.0023(15) 0.0054(15) 0.0045(16) 
N4 0.0253(18) 0.0295(19) 0.0344(19) -0.0036(15) 0.0102(15) 0.0018(15) 
P1 0.0307(6) 0.0275(6) 0.0242(5) -0.0017(4) 0.0065(4) 0.0001(4) 
P2 0.0247(5) 0.0267(6) 0.0303(6) -0.0019(4) 0.0084(4) -0.0045(4) 
P3 0.0302(6) 0.0262(6) 0.0238(5) 0.0040(4) 0.0072(4) 0.0029(5) 
P4 0.0221(5) 0.0256(6) 0.0316(6) -0.0003(4) 0.0062(4) 0.0001(4) 
C1 0.027(2) 0.035(2) 0.031(2) 0.0004(18) 0.0057(18) 0.0016(18) 
C2 0.041(3) 0.041(3) 0.038(3) 0.002(2) 0.006(2) 0.002(2) 
C3 0.050(3) 0.048(3) 0.049(3) 0.014(2) -0.001(2) -0.006(2) 
C4 0.039(3) 0.077(4) 0.030(3) 0.020(3) 0.004(2) -0.004(3) 
C5 0.039(3) 0.070(4) 0.030(3) 0.008(2) 0.010(2) 0.012(2) 
C6 0.032(2) 0.046(3) 0.030(2) 0.003(2) 0.0074(19) 0.007(2) 
C7 0.039(3) 0.032(2) 0.021(2) -0.0016(18) -0.0001(18) 0.0008(19) 
C8 0.038(3) 0.038(3) 0.024(2) -0.0045(18) 0.0042(19) 0.004(2) 
C9 0.050(3) 0.061(3) 0.032(3) -0.004(2) 0.003(2) 0.021(3) 
C10 0.074(4) 0.046(3) 0.036(3) -0.007(2) -0.004(3) 0.025(3) 
C11 0.087(4) 0.030(3) 0.033(3) 0.002(2) -0.007(3) 0.001(3) 
C12 0.057(3) 0.037(3) 0.032(2) 0.000(2) 0.003(2) 0.000(2) 
C13 0.032(2) 0.036(2) 0.027(2) -0.0044(18) 0.0024(18) -0.0071(19) 
C14 0.043(3) 0.054(3) 0.045(3) -0.020(2) 0.002(2) -0.013(2) 
C15 0.048(3) 0.043(3) 0.048(3) -0.004(2) -0.008(2) -0.002(2) 
C16 0.040(3) 0.060(3) 0.039(3) -0.002(2) 0.005(2) -0.025(2) 
C17 0.028(2) 0.033(2) 0.035(2) -0.0041(19) 0.0098(19) -0.0048(19) 
C18 0.031(3) 0.051(3) 0.061(3) 0.016(2) 0.015(2) 0.001(2) 
C19 0.045(3) 0.069(4) 0.084(4) 0.039(3) 0.017(3) 0.013(3) 
C20 0.081(4) 0.066(4) 0.081(4) 0.039(3) 0.040(4) 0.011(3) 
C21 0.070(4) 0.067(4) 0.106(5) 0.037(4) 0.056(4) 0.000(3) 
C22 0.041(3) 0.054(3) 0.072(4) 0.024(3) 0.026(3) 0.001(2) 
C23 0.026(2) 0.024(2) 0.037(2) -0.0026(18) 0.0078(18) -0.0048(17) 
C24 0.036(3) 0.035(2) 0.045(3) -0.005(2) 0.012(2) -0.005(2) 
C25 0.038(3) 0.044(3) 0.057(3) -0.013(2) 0.018(2) -0.002(2) 
C26 0.033(3) 0.036(3) 0.083(4) -0.010(3) 0.013(3) 0.001(2) 
C27 0.038(3) 0.036(3) 0.061(3) -0.002(2) -0.001(2) 0.001(2) 
C28 0.036(3) 0.029(2) 0.043(3) -0.0061(19) 0.005(2) -0.0052(19) 
C29 0.035(2) 0.029(2) 0.043(3) -0.0119(19) 0.011(2) -0.0097(19) 
C30 0.042(3) 0.043(3) 0.084(4) -0.026(3) 0.022(3) -0.023(2) 
C31 0.056(3) 0.031(3) 0.064(3) -0.010(2) 0.019(3) -0.003(2) 
C32 0.077(4) 0.045(3) 0.045(3) -0.018(2) 0.008(3) -0.017(3) 
C33 0.031(2) 0.028(2) 0.023(2) -0.0004(17) 0.0050(17) 0.0027(18) 
C34 0.037(2) 0.025(2) 0.033(2) -0.0006(18) 0.0084(19) 0.0014(19) 
C35 0.036(3) 0.040(3) 0.046(3) -0.004(2) 0.013(2) 0.003(2) 
C36 0.035(3) 0.038(3) 0.046(3) -0.006(2) 0.002(2) 0.010(2) 
C37 0.049(3) 0.029(2) 0.047(3) 0.004(2) 0.009(2) 0.008(2) 
C38 0.038(3) 0.031(2) 0.040(3) 0.0041(19) 0.012(2) 0.004(2) 
C39 0.035(2) 0.031(2) 0.031(2) 0.0104(19) 0.0099(19) 0.0079(19) 
C40 0.036(3) 0.045(3) 0.037(3) 0.002(2) 0.007(2) 0.002(2) 
C41 0.042(3) 0.046(3) 0.064(3) -0.001(3) 0.007(3) -0.008(2) 
C42 0.054(3) 0.058(4) 0.075(4) 0.022(3) 0.029(3) -0.004(3) 
C43 0.072(4) 0.054(3) 0.059(3) 0.004(3) 0.038(3) -0.010(3) 
C44 0.058(3) 0.033(3) 0.044(3) 0.007(2) 0.025(2) -0.001(2) 
C45 0.053(3) 0.043(3) 0.025(2) 0.001(2) -0.002(2) 0.011(2) 
C46 0.155(7) 0.052(4) 0.033(3) 0.013(3) -0.016(3) 0.011(4) 
C47 0.077(4) 0.057(3) 0.031(3) -0.006(2) 0.008(2) 0.014(3) 
C48 0.059(4) 0.129(6) 0.035(3) -0.002(3) -0.010(3) 0.030(4) 
C49 0.029(2) 0.028(2) 0.038(2) 0.0004(18) 0.0137(19) 0.0016(18) 
C50 0.034(2) 0.037(3) 0.049(3) 0.001(2) 0.012(2) -0.002(2) 
C51 0.043(3) 0.042(3) 0.073(4) 0.008(3) 0.023(3) -0.008(2) 
C52 0.033(3) 0.049(3) 0.080(4) -0.007(3) 0.021(3) -0.015(2) 
C53 0.028(2) 0.049(3) 0.067(3) 0.001(3) 0.008(2) -0.003(2) 
C54 0.027(2) 0.038(3) 0.050(3) 0.003(2) 0.007(2) -0.001(2) 
C55 0.021(2) 0.031(2) 0.046(3) 0.006(2) 0.0071(19) -0.0015(18) 
C56 0.061(3) 0.049(3) 0.047(3) 0.010(2) -0.007(2) -0.026(3) 
C57 0.062(4) 0.100(5) 0.058(4) 0.033(4) -0.017(3) -0.034(4) 
C58 0.050(4) 0.065(4) 0.115(6) 0.051(4) 0.009(4) 0.005(3) 
C59 0.074(4) 0.039(3) 0.131(6) 0.030(4) 0.061(4) 0.020(3) 
C60 0.053(3) 0.032(3) 0.074(4) 0.008(2) 0.035(3) 0.006(2) 
C61 0.034(2) 0.038(3) 0.044(3) -0.008(2) 0.016(2) -0.001(2) 
C62 0.030(2) 0.054(3) 0.060(3) -0.006(2) 0.021(2) 0.005(2) 
C63 0.050(3) 0.057(3) 0.073(4) -0.030(3) 0.028(3) -0.004(3) 
C64 0.079(4) 0.065(4) 0.048(3) 0.005(3) 0.035(3) 0.020(3) 
  
_geom_special_details 
; 
 All esds (except the esd in the dihedral angle between two l.s. planes) 
 are estimated using the full covariance matrix.  The cell esds are taken 
 into account individually in the estimation of esds in distances, angles 
 and torsion angles; correlations between esds in cell parameters are only 
 used when they are defined by crystal symmetry.  An approximate (isotropic) 
 treatment of cell esds is used for estimating esds involving l.s. planes. 
; 
  
loop_ 
 _geom_bond_atom_site_label_1 
 _geom_bond_atom_site_label_2 
 _geom_bond_distance 
 _geom_bond_site_symmetry_2 
 _geom_bond_publ_flag 
Cr1 N1 2.086(3) . ? 
Cr1 P1 2.3753(12) . ? 
Cr1 P2 2.5320(12) . ? 
Cr1 P4 2.5578(12) . ? 
Cr1 P3 2.6703(12) . ? 
Cr1 Cr2 2.7688(9) . ? 
Cr2 N2 2.009(3) . ? 
Cr2 N3 2.006(3) . ? 
Cr2 N4 2.029(3) . ? 
Cr2 P3 2.7971(12) . ? 
Cr2 P2 2.8057(12) . ? 
N1 C13 1.502(5) . ? 
N1 P1 1.620(3) . ? 
N2 C29 1.496(5) . ? 
N2 P2 1.632(3) . ? 
N3 C45 1.490(5) . ? 
N3 P3 1.659(3) . ? 
N4 C61 1.503(5) . ? 
N4 P4 1.647(3) . ? 
P1 C7 1.825(4) . ? 
P1 C1 1.826(4) . ? 
P2 C23 1.842(4) . ? 
P2 C17 1.856(4) . ? 
P3 C39 1.842(4) . ? 
P3 C33 1.849(4) . ? 
P4 C49 1.843(4) . ? 
P4 C55 1.843(4) . ? 
C1 C2 1.389(6) . ? 
C1 C6 1.400(6) . ? 
C2 C3 1.398(6) . ? 
C3 C4 1.373(7) . ? 
C4 C5 1.375(7) . ? 
C5 C6 1.379(6) . ? 
C7 C12 1.396(6) . ? 
C7 C8 1.399(6) . ? 
C8 C9 1.374(6) . ? 
C9 C10 1.364(7) . ? 
C10 C11 1.366(7) . ? 
C11 C12 1.400(7) . ? 
C13 C14 1.509(6) . ? 
C13 C16 1.519(6) . ? 
C13 C15 1.524(6) . ? 
C17 C18 1.379(6) . ? 
C17 C22 1.388(6) . ? 
C18 C19 1.381(6) . ? 
C19 C20 1.350(7) . ? 
C20 C21 1.371(8) . ? 
C21 C22 1.378(7) . ? 
C23 C28 1.389(6) . ? 
C23 C24 1.402(6) . ? 
C24 C25 1.384(6) . ? 
C25 C26 1.382(7) . ? 
C26 C27 1.372(7) . ? 
C27 C28 1.386(6) . ? 
C29 C31 1.531(6) . ? 
C29 C32 1.530(6) . ? 
C29 C30 1.529(6) . ? 
C33 C38 1.392(5) . ? 
C33 C34 1.388(5) . ? 
C34 C35 1.378(6) . ? 
C35 C36 1.375(6) . ? 
C36 C37 1.385(6) . ? 
C37 C38 1.377(6) . ? 
C39 C40 1.382(6) . ? 
C39 C44 1.392(6) . ? 
C40 C41 1.378(6) . ? 
C41 C42 1.383(7) . ? 
C42 C43 1.379(7) . ? 
C43 C44 1.377(6) . ? 
C45 C46 1.528(7) . ? 
C45 C48 1.520(7) . ? 
C45 C47 1.516(6) . ? 
C49 C50 1.396(6) . ? 
C49 C54 1.388(6) . ? 
C50 C51 1.375(6) . ? 
C51 C52 1.381(7) . ? 
C52 C53 1.367(7) . ? 
C53 C54 1.376(6) . ? 
C55 C60 1.392(6) . ? 
C55 C56 1.387(6) . ? 
C56 C57 1.407(7) . ? 
C57 C58 1.362(9) . ? 
C58 C59 1.356(9) . ? 
C59 C60 1.375(7) . ? 
C61 C64 1.529(6) . ? 
C61 C63 1.527(6) . ? 
C61 C62 1.532(6) . ? 
C65 C66 1.3900 . ? 
C65 C70 1.3900 . ? 
C65 C71 1.50(2) . ? 
C66 C67 1.3900 . ? 
C67 C68 1.3900 . ? 
C68 C69 1.3900 . ? 
C69 C70 1.3900 . ? 
C72 C78 1.50(3) . ? 
C72 C73 1.3900 . ? 
C72 C77 1.3900 . ? 
C73 C74 1.3900 . ? 
C74 C75 1.3900 . ? 
C75 C76 1.3900 . ? 
C76 C77 1.3900 . ? 
C79 C80 1.3900 . ? 
C79 C84 1.3900 . ? 
C79 C85 1.43(2) . ? 
C80 C81 1.3900 . ? 
C81 C82 1.3900 . ? 
C82 C83 1.3900 . ? 
C83 C84 1.3900 . ? 
  
loop_ 
 _geom_angle_atom_site_label_1 
 _geom_angle_atom_site_label_2 
 _geom_angle_atom_site_label_3 
 _geom_angle 
 _geom_angle_site_symmetry_1 
 _geom_angle_site_symmetry_3 
 _geom_angle_publ_flag 
N1 Cr1 P1 41.97(9) . . ? 
N1 Cr1 P2 140.25(9) . . ? 
P1 Cr1 P2 100.24(4) . . ? 
N1 Cr1 P4 106.99(9) . . ? 
P1 Cr1 P4 140.17(4) . . ? 
P2 Cr1 P4 98.01(4) . . ? 
N1 Cr1 P3 101.35(9) . . ? 
P1 Cr1 P3 106.26(4) . . ? 
P2 Cr1 P3 101.85(4) . . ? 
P4 Cr1 P3 104.15(4) . . ? 
N1 Cr1 Cr2 155.67(9) . . ? 
P1 Cr1 Cr2 154.73(4) . . ? 
P2 Cr1 Cr2 63.73(3) . . ? 
P4 Cr1 Cr2 64.41(3) . . ? 
P3 Cr1 Cr2 61.86(3) . . ? 
N2 Cr2 N3 117.41(14) . . ? 
N2 Cr2 N4 110.20(13) . . ? 
N3 Cr2 N4 132.38(14) . . ? 
N2 Cr2 Cr1 88.29(9) . . ? 
N3 Cr2 Cr1 91.53(9) . . ? 
N4 Cr2 Cr1 88.72(9) . . ? 
N2 Cr2 P3 120.72(10) . . ? 
N3 Cr2 P3 35.85(9) . . ? 
N4 Cr2 P3 114.90(10) . . ? 
Cr1 Cr2 P3 57.34(3) . . ? 
N2 Cr2 P2 34.92(9) . . ? 
N3 Cr2 P2 107.14(10) . . ? 
N4 Cr2 P2 111.09(10) . . ? 
Cr1 Cr2 P2 54.02(3) . . ? 
P3 Cr2 P2 92.27(3) . . ? 
C13 N1 P1 129.6(3) . . ? 
C13 N1 Cr1 148.8(3) . . ? 
P1 N1 Cr1 78.60(13) . . ? 
C29 N2 P2 130.2(3) . . ? 
C29 N2 Cr2 129.4(3) . . ? 
P2 N2 Cr2 100.29(16) . . ? 
C45 N3 P3 128.3(3) . . ? 
C45 N3 Cr2 132.6(3) . . ? 
P3 N3 Cr2 99.06(16) . . ? 
C61 N4 P4 130.3(3) . . ? 
C61 N4 Cr2 127.7(3) . . ? 
P4 N4 Cr2 100.85(15) . . ? 
N1 P1 C7 115.45(18) . . ? 
N1 P1 C1 115.18(17) . . ? 
C7 P1 C1 103.36(18) . . ? 
N1 P1 Cr1 59.43(11) . . ? 
C7 P1 Cr1 129.11(13) . . ? 
C1 P1 Cr1 125.22(14) . . ? 
N2 P2 C23 110.50(18) . . ? 
N2 P2 C17 110.80(18) . . ? 
C23 P2 C17 100.70(18) . . ? 
N2 P2 Cr1 106.13(12) . . ? 
C23 P2 Cr1 110.38(13) . . ? 
C17 P2 Cr1 118.27(13) . . ? 
N2 P2 Cr2 44.79(11) . . ? 
C23 P2 Cr2 116.94(13) . . ? 
C17 P2 Cr2 139.94(13) . . ? 
Cr1 P2 Cr2 62.25(3) . . ? 
N3 P3 C39 108.30(18) . . ? 
N3 P3 C33 110.15(17) . . ? 
C39 P3 C33 101.89(18) . . ? 
N3 P3 Cr1 103.75(12) . . ? 
C39 P3 Cr1 115.61(13) . . ? 
C33 P3 Cr1 117.03(12) . . ? 
N3 P3 Cr2 45.09(11) . . ? 
C39 P3 Cr2 113.80(13) . . ? 
C33 P3 Cr2 141.15(13) . . ? 
Cr1 P3 Cr2 60.80(3) . . ? 
N4 P4 C49 110.17(18) . . ? 
N4 P4 C55 111.71(18) . . ? 
C49 P4 C55 100.60(18) . . ? 
N4 P4 Cr1 105.69(12) . . ? 
C49 P4 Cr1 114.64(13) . . ? 
C55 P4 Cr1 114.16(14) . . ? 
C2 C1 C6 117.6(4) . . ? 
C2 C1 P1 117.4(3) . . ? 
C6 C1 P1 125.0(3) . . ? 
C3 C2 C1 120.9(4) . . ? 
C4 C3 C2 120.1(5) . . ? 
C3 C4 C5 119.7(4) . . ? 
C6 C5 C4 120.5(4) . . ? 
C5 C6 C1 121.2(4) . . ? 
C12 C7 C8 118.6(4) . . ? 
C12 C7 P1 121.0(3) . . ? 
C8 C7 P1 119.9(3) . . ? 
C9 C8 C7 120.8(4) . . ? 
C10 C9 C8 120.3(5) . . ? 
C9 C10 C11 120.3(5) . . ? 
C10 C11 C12 120.9(5) . . ? 
C7 C12 C11 119.0(5) . . ? 
N1 C13 C14 112.8(3) . . ? 
N1 C13 C16 108.3(3) . . ? 
C14 C13 C16 109.4(4) . . ? 
N1 C13 C15 109.1(3) . . ? 
C14 C13 C15 107.8(4) . . ? 
C16 C13 C15 109.4(4) . . ? 
C18 C17 C22 116.6(4) . . ? 
C18 C17 P2 118.2(3) . . ? 
C22 C17 P2 125.1(3) . . ? 
C17 C18 C19 121.7(4) . . ? 
C20 C19 C18 120.7(5) . . ? 
C19 C20 C21 119.3(5) . . ? 
C20 C21 C22 120.3(5) . . ? 
C21 C22 C17 121.4(5) . . ? 
C28 C23 C24 117.5(4) . . ? 
C28 C23 P2 120.5(3) . . ? 
C24 C23 P2 121.9(3) . . ? 
C25 C24 C23 120.8(4) . . ? 
C24 C25 C26 120.4(5) . . ? 
C27 C26 C25 119.6(4) . . ? 
C26 C27 C28 120.3(5) . . ? 
C27 C28 C23 121.4(4) . . ? 
N2 C29 C31 110.0(3) . . ? 
N2 C29 C32 106.8(3) . . ? 
C31 C29 C32 109.7(4) . . ? 
N2 C29 C30 113.8(3) . . ? 
C31 C29 C30 107.9(4) . . ? 
C32 C29 C30 108.6(4) . . ? 
C38 C33 C34 117.6(4) . . ? 
C38 C33 P3 125.6(3) . . ? 
C34 C33 P3 116.8(3) . . ? 
C35 C34 C33 121.2(4) . . ? 
C36 C35 C34 120.5(4) . . ? 
C35 C36 C37 119.3(4) . . ? 
C38 C37 C36 120.0(4) . . ? 
C37 C38 C33 121.4(4) . . ? 
C40 C39 C44 117.1(4) . . ? 
C40 C39 P3 122.9(3) . . ? 
C44 C39 P3 119.8(3) . . ? 
C41 C40 C39 121.4(4) . . ? 
C40 C41 C42 120.5(5) . . ? 
C43 C42 C41 119.3(5) . . ? 
C44 C43 C42 119.5(5) . . ? 
C43 C44 C39 122.3(5) . . ? 
N3 C45 C46 114.5(4) . . ? 
N3 C45 C48 109.4(4) . . ? 
C46 C45 C48 108.9(5) . . ? 
N3 C45 C47 107.9(4) . . ? 
C46 C45 C47 108.3(4) . . ? 
C48 C45 C47 107.7(4) . . ? 
C50 C49 C54 116.9(4) . . ? 
C50 C49 P4 117.3(3) . . ? 
C54 C49 P4 125.8(3) . . ? 
C51 C50 C49 121.7(4) . . ? 
C50 C51 C52 119.4(5) . . ? 
C53 C52 C51 120.3(4) . . ? 
C52 C53 C54 119.9(5) . . ? 
C53 C54 C49 121.7(4) . . ? 
C60 C55 C56 116.8(4) . . ? 
C60 C55 P4 122.7(4) . . ? 
C56 C55 P4 120.3(3) . . ? 
C57 C56 C55 120.6(5) . . ? 
C58 C57 C56 120.1(6) . . ? 
C59 C58 C57 120.0(6) . . ? 
C58 C59 C60 120.4(6) . . ? 
C59 C60 C55 121.9(5) . . ? 
N4 C61 C64 108.6(3) . . ? 
N4 C61 C63 108.8(3) . . ? 
C64 C61 C63 107.1(4) . . ? 
N4 C61 C62 115.7(4) . . ? 
C64 C61 C62 108.3(4) . . ? 
C63 C61 C62 108.1(4) . . ? 
C66 C65 C70 120.0 . . ? 
C66 C65 C71 120.5(11) . . ? 
C70 C65 C71 119.5(11) . . ? 
C67 C66 C65 120.0 . . ? 
C66 C67 C68 120.0 . . ? 
C67 C68 C69 120.0 . . ? 
C70 C69 C68 120.0 . . ? 
C69 C70 C65 120.0 . . ? 
C78 C72 C73 124.3(16) . . ? 
C78 C72 C77 115.5(16) . . ? 
C73 C72 C77 120.0 . . ? 
C74 C73 C72 120.0 . . ? 
C73 C74 C75 120.0 . . ? 
C76 C75 C74 120.0 . . ? 
C75 C76 C77 120.0 . . ? 
C76 C77 C72 120.0 . . ? 
C80 C79 C84 120.0 . . ? 
C80 C79 C85 119.3(11) . . ? 
C84 C79 C85 120.7(11) . . ? 
C81 C80 C79 120.0 . . ? 
C80 C81 C82 120.0 . . ? 
C83 C82 C81 120.0 . . ? 
C82 C83 C84 120.0 . . ? 
C83 C84 C79 120.0 . . ? 
  
loop_ 
 _geom_torsion_atom_site_label_1 
 _geom_torsion_atom_site_label_2 
 _geom_torsion_atom_site_label_3 
 _geom_torsion_atom_site_label_4 
 _geom_torsion 
 _geom_torsion_site_symmetry_1 
 _geom_torsion_site_symmetry_2 
 _geom_torsion_site_symmetry_3 
 _geom_torsion_site_symmetry_4 
 _geom_torsion_publ_flag 
N1 Cr1 Cr2 N2 178.9(2) . . . . ? 
P1 Cr1 Cr2 N2 61.67(13) . . . . ? 
P2 Cr1 Cr2 N2 7.20(10) . . . . ? 
P4 Cr1 Cr2 N2 -106.93(10) . . . . ? 
P3 Cr1 Cr2 N2 128.77(10) . . . . ? 
N1 Cr1 Cr2 N3 61.5(2) . . . . ? 
P1 Cr1 Cr2 N3 -55.71(13) . . . . ? 
P2 Cr1 Cr2 N3 -110.18(10) . . . . ? 
P4 Cr1 Cr2 N3 135.69(10) . . . . ? 
P3 Cr1 Cr2 N3 11.40(10) . . . . ? 
N1 Cr1 Cr2 N4 -70.8(2) . . . . ? 
P1 Cr1 Cr2 N4 171.92(12) . . . . ? 
P2 Cr1 Cr2 N4 117.45(10) . . . . ? 
P4 Cr1 Cr2 N4 3.32(10) . . . . ? 
P3 Cr1 Cr2 N4 -120.97(10) . . . . ? 
N1 Cr1 Cr2 P3 50.1(2) . . . . ? 
P1 Cr1 Cr2 P3 -67.11(9) . . . . ? 
P2 Cr1 Cr2 P3 -121.58(4) . . . . ? 
P4 Cr1 Cr2 P3 124.29(4) . . . . ? 
N1 Cr1 Cr2 P2 171.7(2) . . . . ? 
P1 Cr1 Cr2 P2 54.47(9) . . . . ? 
P4 Cr1 Cr2 P2 -114.13(4) . . . . ? 
P3 Cr1 Cr2 P2 121.58(4) . . . . ? 
P1 Cr1 N1 C13 -157.4(6) . . . . ? 
P2 Cr1 N1 C13 -134.5(4) . . . . ? 
P4 Cr1 N1 C13 -7.9(5) . . . . ? 
P3 Cr1 N1 C13 100.8(5) . . . . ? 
Cr2 Cr1 N1 C13 57.2(6) . . . . ? 
P2 Cr1 N1 P1 22.9(2) . . . . ? 
P4 Cr1 N1 P1 149.45(9) . . . . ? 
P3 Cr1 N1 P1 -101.76(11) . . . . ? 
Cr2 Cr1 N1 P1 -145.43(15) . . . . ? 
N3 Cr2 N2 C29 -103.8(3) . . . . ? 
N4 Cr2 N2 C29 77.3(3) . . . . ? 
Cr1 Cr2 N2 C29 165.4(3) . . . . ? 
P3 Cr2 N2 C29 -144.9(3) . . . . ? 
P2 Cr2 N2 C29 175.6(4) . . . . ? 
N3 Cr2 N2 P2 80.63(19) . . . . ? 
N4 Cr2 N2 P2 -98.21(17) . . . . ? 
Cr1 Cr2 N2 P2 -10.20(14) . . . . ? 
P3 Cr2 N2 P2 39.57(19) . . . . ? 
N2 Cr2 N3 C45 76.9(4) . . . . ? 
N4 Cr2 N3 C45 -104.6(4) . . . . ? 
Cr1 Cr2 N3 C45 165.7(4) . . . . ? 
P3 Cr2 N3 C45 -177.8(5) . . . . ? 
P2 Cr2 N3 C45 113.1(4) . . . . ? 
N2 Cr2 N3 P3 -105.37(17) . . . . ? 
N4 Cr2 N3 P3 73.2(2) . . . . ? 
Cr1 Cr2 N3 P3 -16.50(14) . . . . ? 
P2 Cr2 N3 P3 -69.14(15) . . . . ? 
N2 Cr2 N4 C61 -108.5(3) . . . . ? 
N3 Cr2 N4 C61 72.9(4) . . . . ? 
Cr1 Cr2 N4 C61 163.8(3) . . . . ? 
P3 Cr2 N4 C61 111.0(3) . . . . ? 
P2 Cr2 N4 C61 -145.9(3) . . . . ? 
N2 Cr2 N4 P4 82.97(17) . . . . ? 
N3 Cr2 N4 P4 -95.6(2) . . . . ? 
Cr1 Cr2 N4 P4 -4.74(14) . . . . ? 
P3 Cr2 N4 P4 -57.48(16) . . . . ? 
P2 Cr2 N4 P4 45.58(16) . . . . ? 
C13 N1 P1 C7 -73.0(4) . . . . ? 
Cr1 N1 P1 C7 122.02(15) . . . . ? 
C13 N1 P1 C1 47.5(4) . . . . ? 
Cr1 N1 P1 C1 -117.54(16) . . . . ? 
C13 N1 P1 Cr1 165.0(4) . . . . ? 
P2 Cr1 P1 N1 -165.34(14) . . . . ? 
P4 Cr1 P1 N1 -49.37(15) . . . . ? 
P3 Cr1 P1 N1 88.99(14) . . . . ? 
Cr2 Cr1 P1 N1 146.79(15) . . . . ? 
N1 Cr1 P1 C7 -99.4(2) . . . . ? 
P2 Cr1 P1 C7 95.27(18) . . . . ? 
P4 Cr1 P1 C7 -148.76(18) . . . . ? 
P3 Cr1 P1 C7 -10.40(19) . . . . ? 
Cr2 Cr1 P1 C7 47.4(2) . . . . ? 
N1 Cr1 P1 C1 100.8(2) . . . . ? 
P2 Cr1 P1 C1 -64.51(16) . . . . ? 
P4 Cr1 P1 C1 51.46(18) . . . . ? 
P3 Cr1 P1 C1 -170.18(16) . . . . ? 
Cr2 Cr1 P1 C1 -112.38(17) . . . . ? 
C29 N2 P2 C23 76.4(4) . . . . ? 
Cr2 N2 P2 C23 -108.05(17) . . . . ? 
C29 N2 P2 C17 -34.3(4) . . . . ? 
Cr2 N2 P2 C17 141.21(16) . . . . ? 
C29 N2 P2 Cr1 -163.9(3) . . . . ? 
Cr2 N2 P2 Cr1 11.63(16) . . . . ? 
C29 N2 P2 Cr2 -175.5(4) . . . . ? 
N1 Cr1 P2 N2 176.09(19) . . . . ? 
P1 Cr1 P2 N2 -168.56(13) . . . . ? 
P4 Cr1 P2 N2 46.99(13) . . . . ? 
P3 Cr1 P2 N2 -59.37(13) . . . . ? 
Cr2 Cr1 P2 N2 -9.23(13) . . . . ? 
N1 Cr1 P2 C23 -64.2(2) . . . . ? 
P1 Cr1 P2 C23 -48.81(14) . . . . ? 
P4 Cr1 P2 C23 166.74(14) . . . . ? 
P3 Cr1 P2 C23 60.38(14) . . . . ? 
Cr2 Cr1 P2 C23 110.52(14) . . . . ? 
N1 Cr1 P2 C17 51.0(2) . . . . ? 
P1 Cr1 P2 C17 66.32(15) . . . . ? 
P4 Cr1 P2 C17 -78.13(15) . . . . ? 
P3 Cr1 P2 C17 175.51(15) . . . . ? 
Cr2 Cr1 P2 C17 -134.35(15) . . . . ? 
N1 Cr1 P2 Cr2 -174.68(15) . . . . ? 
P1 Cr1 P2 Cr2 -159.33(4) . . . . ? 
P4 Cr1 P2 Cr2 56.22(3) . . . . ? 
P3 Cr1 P2 Cr2 -50.14(3) . . . . ? 
N3 Cr2 P2 N2 -113.6(2) . . . . ? 
N4 Cr2 P2 N2 95.39(19) . . . . ? 
Cr1 Cr2 P2 N2 167.36(17) . . . . ? 
P3 Cr2 P2 N2 -146.77(17) . . . . ? 
N2 Cr2 P2 C23 92.6(2) . . . . ? 
N3 Cr2 P2 C23 -20.94(17) . . . . ? 
N4 Cr2 P2 C23 -171.99(17) . . . . ? 
Cr1 Cr2 P2 C23 -100.02(14) . . . . ? 
P3 Cr2 P2 C23 -54.15(14) . . . . ? 
N2 Cr2 P2 C17 -65.5(3) . . . . ? 
N3 Cr2 P2 C17 -179.1(2) . . . . ? 
N4 Cr2 P2 C17 29.9(2) . . . . ? 
Cr1 Cr2 P2 C17 101.9(2) . . . . ? 
P3 Cr2 P2 C17 147.7(2) . . . . ? 
N2 Cr2 P2 Cr1 -167.36(17) . . . . ? 
N3 Cr2 P2 Cr1 79.08(10) . . . . ? 
N4 Cr2 P2 Cr1 -71.97(10) . . . . ? 
P3 Cr2 P2 Cr1 45.87(3) . . . . ? 
C45 N3 P3 C39 72.2(4) . . . . ? 
Cr2 N3 P3 C39 -105.69(17) . . . . ? 
C45 N3 P3 C33 -38.4(4) . . . . ? 
Cr2 N3 P3 C33 143.67(16) . . . . ? 
C45 N3 P3 Cr1 -164.5(3) . . . . ? 
Cr2 N3 P3 Cr1 17.64(15) . . . . ? 
C45 N3 P3 Cr2 177.9(4) . . . . ? 
N1 Cr1 P3 N3 -175.42(15) . . . . ? 
P1 Cr1 P3 N3 141.58(13) . . . . ? 
P2 Cr1 P3 N3 37.08(13) . . . . ? 
P4 Cr1 P3 N3 -64.45(13) . . . . ? 
Cr2 Cr1 P3 N3 -14.24(12) . . . . ? 
N1 Cr1 P3 C39 -57.02(17) . . . . ? 
P1 Cr1 P3 C39 -100.01(15) . . . . ? 
P2 Cr1 P3 C39 155.48(15) . . . . ? 
P4 Cr1 P3 C39 53.96(15) . . . . ? 
Cr2 Cr1 P3 C39 104.17(15) . . . . ? 
N1 Cr1 P3 C33 63.06(17) . . . . ? 
P1 Cr1 P3 C33 20.06(15) . . . . ? 
P2 Cr1 P3 C33 -84.44(15) . . . . ? 
P4 Cr1 P3 C33 174.03(14) . . . . ? 
Cr2 Cr1 P3 C33 -135.76(15) . . . . ? 
N1 Cr1 P3 Cr2 -161.18(9) . . . . ? 
P1 Cr1 P3 Cr2 155.82(4) . . . . ? 
P2 Cr1 P3 Cr2 51.32(3) . . . . ? 
P4 Cr1 P3 Cr2 -50.21(3) . . . . ? 
N2 Cr2 P3 N3 95.3(2) . . . . ? 
N4 Cr2 P3 N3 -128.79(19) . . . . ? 
Cr1 Cr2 P3 N3 160.29(17) . . . . ? 
P2 Cr2 P3 N3 116.66(17) . . . . ? 
N2 Cr2 P3 C39 -172.17(18) . . . . ? 
N3 Cr2 P3 C39 92.6(2) . . . . ? 
N4 Cr2 P3 C39 -36.21(18) . . . . ? 
Cr1 Cr2 P3 C39 -107.14(14) . . . . ? 
P2 Cr2 P3 C39 -150.77(14) . . . . ? 
N2 Cr2 P3 C33 32.8(2) . . . . ? 
N3 Cr2 P3 C33 -62.5(3) . . . . ? 
N4 Cr2 P3 C33 168.7(2) . . . . ? 
Cr1 Cr2 P3 C33 97.8(2) . . . . ? 
P2 Cr2 P3 C33 54.2(2) . . . . ? 
N2 Cr2 P3 Cr1 -65.03(11) . . . . ? 
N3 Cr2 P3 Cr1 -160.29(17) . . . . ? 
N4 Cr2 P3 Cr1 70.93(10) . . . . ? 
P2 Cr2 P3 Cr1 -43.63(3) . . . . ? 
C61 N4 P4 C49 -38.4(4) . . . . ? 
Cr2 N4 P4 C49 129.70(17) . . . . ? 
C61 N4 P4 C55 72.5(4) . . . . ? 
Cr2 N4 P4 C55 -119.37(17) . . . . ? 
C61 N4 P4 Cr1 -162.8(3) . . . . ? 
Cr2 N4 P4 Cr1 5.33(15) . . . . ? 
N1 Cr1 P4 N4 151.27(15) . . . . ? 
P1 Cr1 P4 N4 -176.68(13) . . . . ? 
P2 Cr1 P4 N4 -59.99(13) . . . . ? 
P3 Cr1 P4 N4 44.45(13) . . . . ? 
Cr2 Cr1 P4 N4 -4.25(12) . . . . ? 
N1 Cr1 P4 C49 29.74(18) . . . . ? 
P1 Cr1 P4 C49 61.79(16) . . . . ? 
P2 Cr1 P4 C49 178.48(15) . . . . ? 
P3 Cr1 P4 C49 -77.08(15) . . . . ? 
Cr2 Cr1 P4 C49 -125.78(15) . . . . ? 
N1 Cr1 P4 C55 -85.57(17) . . . . ? 
P1 Cr1 P4 C55 -53.52(16) . . . . ? 
P2 Cr1 P4 C55 63.18(15) . . . . ? 
P3 Cr1 P4 C55 167.62(15) . . . . ? 
Cr2 Cr1 P4 C55 118.91(15) . . . . ? 
N1 P1 C1 C2 78.9(4) . . . . ? 
C7 P1 C1 C2 -154.3(3) . . . . ? 
Cr1 P1 C1 C2 9.7(4) . . . . ? 
N1 P1 C1 C6 -99.9(4) . . . . ? 
C7 P1 C1 C6 27.0(4) . . . . ? 
Cr1 P1 C1 C6 -169.0(3) . . . . ? 
C6 C1 C2 C3 -0.3(6) . . . . ? 
P1 C1 C2 C3 -179.1(3) . . . . ? 
C1 C2 C3 C4 -0.2(7) . . . . ? 
C2 C3 C4 C5 0.9(7) . . . . ? 
C3 C4 C5 C6 -1.1(7) . . . . ? 
C4 C5 C6 C1 0.6(7) . . . . ? 
C2 C1 C6 C5 0.0(6) . . . . ? 
P1 C1 C6 C5 178.8(3) . . . . ? 
N1 P1 C7 C12 -12.7(4) . . . . ? 
C1 P1 C7 C12 -139.4(3) . . . . ? 
Cr1 P1 C7 C12 57.4(4) . . . . ? 
N1 P1 C7 C8 175.0(3) . . . . ? 
C1 P1 C7 C8 48.4(3) . . . . ? 
Cr1 P1 C7 C8 -114.8(3) . . . . ? 
C12 C7 C8 C9 0.1(6) . . . . ? 
P1 C7 C8 C9 172.5(3) . . . . ? 
C7 C8 C9 C10 0.6(6) . . . . ? 
C8 C9 C10 C11 -0.5(7) . . . . ? 
C9 C10 C11 C12 -0.5(7) . . . . ? 
C8 C7 C12 C11 -1.0(6) . . . . ? 
P1 C7 C12 C11 -173.3(3) . . . . ? 
C10 C11 C12 C7 1.2(7) . . . . ? 
P1 N1 C13 C14 21.3(5) . . . . ? 
Cr1 N1 C13 C14 172.0(4) . . . . ? 
P1 N1 C13 C16 142.5(3) . . . . ? 
Cr1 N1 C13 C16 -66.8(6) . . . . ? 
P1 N1 C13 C15 -98.5(4) . . . . ? 
Cr1 N1 C13 C15 52.2(6) . . . . ? 
N2 P2 C17 C18 -72.1(4) . . . . ? 
C23 P2 C17 C18 170.9(4) . . . . ? 
Cr1 P2 C17 C18 50.7(4) . . . . ? 
Cr2 P2 C17 C18 -28.8(5) . . . . ? 
N2 P2 C17 C22 104.4(4) . . . . ? 
C23 P2 C17 C22 -12.5(4) . . . . ? 
Cr1 P2 C17 C22 -132.8(4) . . . . ? 
Cr2 P2 C17 C22 147.7(3) . . . . ? 
C22 C17 C18 C19 0.8(7) . . . . ? 
P2 C17 C18 C19 177.7(4) . . . . ? 
C17 C18 C19 C20 -1.1(9) . . . . ? 
C18 C19 C20 C21 0.3(10) . . . . ? 
C19 C20 C21 C22 0.6(10) . . . . ? 
C20 C21 C22 C17 -0.8(10) . . . . ? 
C18 C17 C22 C21 0.1(8) . . . . ? 
P2 C17 C22 C21 -176.5(4) . . . . ? 
N2 P2 C23 C28 12.9(4) . . . . ? 
C17 P2 C23 C28 130.0(3) . . . . ? 
Cr1 P2 C23 C28 -104.2(3) . . . . ? 
Cr2 P2 C23 C28 -35.8(4) . . . . ? 
N2 P2 C23 C24 -171.9(3) . . . . ? 
C17 P2 C23 C24 -54.7(4) . . . . ? 
Cr1 P2 C23 C24 71.1(3) . . . . ? 
Cr2 P2 C23 C24 139.4(3) . . . . ? 
C28 C23 C24 C25 -1.6(6) . . . . ? 
P2 C23 C24 C25 -177.0(3) . . . . ? 
C23 C24 C25 C26 1.1(7) . . . . ? 
C24 C25 C26 C27 0.3(7) . . . . ? 
C25 C26 C27 C28 -1.1(7) . . . . ? 
C26 C27 C28 C23 0.6(7) . . . . ? 
C24 C23 C28 C27 0.7(6) . . . . ? 
P2 C23 C28 C27 176.2(3) . . . . ? 
P2 N2 C29 C31 88.3(4) . . . . ? 
Cr2 N2 C29 C31 -85.9(4) . . . . ? 
P2 N2 C29 C32 -152.7(3) . . . . ? 
Cr2 N2 C29 C32 33.0(5) . . . . ? 
P2 N2 C29 C30 -32.9(5) . . . . ? 
Cr2 N2 C29 C30 152.9(3) . . . . ? 
N3 P3 C33 C38 104.5(4) . . . . ? 
C39 P3 C33 C38 -10.3(4) . . . . ? 
Cr1 P3 C33 C38 -137.4(3) . . . . ? 
Cr2 P3 C33 C38 146.5(3) . . . . ? 
N3 P3 C33 C34 -73.1(3) . . . . ? 
C39 P3 C33 C34 172.2(3) . . . . ? 
Cr1 P3 C33 C34 45.1(3) . . . . ? 
Cr2 P3 C33 C34 -31.1(4) . . . . ? 
C38 C33 C34 C35 -1.8(6) . . . . ? 
P3 C33 C34 C35 175.9(3) . . . . ? 
C33 C34 C35 C36 1.4(6) . . . . ? 
C34 C35 C36 C37 0.2(7) . . . . ? 
C35 C36 C37 C38 -1.2(7) . . . . ? 
C36 C37 C38 C33 0.7(7) . . . . ? 
C34 C33 C38 C37 0.8(6) . . . . ? 
P3 C33 C38 C37 -176.7(3) . . . . ? 
N3 P3 C39 C40 -170.2(3) . . . . ? 
C33 P3 C39 C40 -54.1(4) . . . . ? 
Cr1 P3 C39 C40 74.0(4) . . . . ? 
Cr2 P3 C39 C40 141.6(3) . . . . ? 
N3 P3 C39 C44 16.0(4) . . . . ? 
C33 P3 C39 C44 132.2(3) . . . . ? 
Cr1 P3 C39 C44 -99.8(3) . . . . ? 
Cr2 P3 C39 C44 -32.1(4) . . . . ? 
C44 C39 C40 C41 -1.5(6) . . . . ? 
P3 C39 C40 C41 -175.4(3) . . . . ? 
C39 C40 C41 C42 0.7(7) . . . . ? 
C40 C41 C42 C43 -0.3(8) . . . . ? 
C41 C42 C43 C44 0.7(8) . . . . ? 
C42 C43 C44 C39 -1.5(8) . . . . ? 
C40 C39 C44 C43 1.9(7) . . . . ? 
P3 C39 C44 C43 176.0(4) . . . . ? 
P3 N3 C45 C46 -26.6(6) . . . . ? 
Cr2 N3 C45 C46 150.5(4) . . . . ? 
P3 N3 C45 C48 95.9(5) . . . . ? 
Cr2 N3 C45 C48 -86.9(5) . . . . ? 
P3 N3 C45 C47 -147.2(3) . . . . ? 
Cr2 N3 C45 C47 30.0(6) . . . . ? 
N4 P4 C49 C50 -54.6(4) . . . . ? 
C55 P4 C49 C50 -172.6(3) . . . . ? 
Cr1 P4 C49 C50 64.5(3) . . . . ? 
N4 P4 C49 C54 124.8(4) . . . . ? 
C55 P4 C49 C54 6.8(4) . . . . ? 
Cr1 P4 C49 C54 -116.2(4) . . . . ? 
C54 C49 C50 C51 -1.0(6) . . . . ? 
P4 C49 C50 C51 178.4(4) . . . . ? 
C49 C50 C51 C52 0.6(7) . . . . ? 
C50 C51 C52 C53 0.3(8) . . . . ? 
C51 C52 C53 C54 -0.8(8) . . . . ? 
C52 C53 C54 C49 0.4(7) . . . . ? 
C50 C49 C54 C53 0.5(6) . . . . ? 
P4 C49 C54 C53 -178.8(4) . . . . ? 
N4 P4 C55 C60 -3.9(4) . . . . ? 
C49 P4 C55 C60 113.0(4) . . . . ? 
Cr1 P4 C55 C60 -123.7(3) . . . . ? 
N4 P4 C55 C56 171.3(3) . . . . ? 
C49 P4 C55 C56 -71.8(4) . . . . ? 
Cr1 P4 C55 C56 51.5(4) . . . . ? 
C60 C55 C56 C57 -3.1(7) . . . . ? 
P4 C55 C56 C57 -178.6(4) . . . . ? 
C55 C56 C57 C58 1.9(8) . . . . ? 
C56 C57 C58 C59 0.8(9) . . . . ? 
C57 C58 C59 C60 -2.1(9) . . . . ? 
C58 C59 C60 C55 0.7(8) . . . . ? 
C56 C55 C60 C59 1.9(7) . . . . ? 
P4 C55 C60 C59 177.3(4) . . . . ? 
P4 N4 C61 C64 111.9(4) . . . . ? 
Cr2 N4 C61 C64 -53.2(5) . . . . ? 
P4 N4 C61 C63 -131.8(4) . . . . ? 
Cr2 N4 C61 C63 63.0(5) . . . . ? 
P4 N4 C61 C62 -10.0(6) . . . . ? 
Cr2 N4 C61 C62 -175.2(3) . . . . ? 
C70 C65 C66 C67 0.0 . . . . ? 
C71 C65 C66 C67 -178.5(14) . . . . ? 
C65 C66 C67 C68 0.0 . . . . ? 
C66 C67 C68 C69 0.0 . . . . ? 
C67 C68 C69 C70 0.0 . . . . ? 
C68 C69 C70 C65 0.0 . . . . ? 
C66 C65 C70 C69 0.0 . . . . ? 
C71 C65 C70 C69 178.5(14) . . . . ? 
C78 C72 C73 C74 175(2) . . . . ? 
C77 C72 C73 C74 0.0 . . . . ? 
C72 C73 C74 C75 0.0 . . . . ? 
C73 C74 C75 C76 0.0 . . . . ? 
C74 C75 C76 C77 0.0 . . . . ? 
C75 C76 C77 C72 0.0 . . . . ? 
C78 C72 C77 C76 -176(2) . . . . ? 
C73 C72 C77 C76 0.0 . . . . ? 
C84 C79 C80 C81 0.0 . . . . ? 
C85 C79 C80 C81 -179.2(12) . . . . ? 
C79 C80 C81 C82 0.0 . . . . ? 
C80 C81 C82 C83 0.0 . . . . ? 
C81 C82 C83 C84 0.0 . . . . ? 
C82 C83 C84 C79 0.0 . . . . ? 
C80 C79 C84 C83 0.0 . . . . ? 
C85 C79 C84 C83 179.2(12) . . . . ? 
  
_diffrn_measured_fraction_theta_max    0.991 
_diffrn_reflns_theta_full              24.80 
_diffrn_measured_fraction_theta_full   0.991 
_refine_diff_density_max    0.455 
_refine_diff_density_min   -0.473 
_refine_diff_density_rms    0.071 


                  


                                         # = = = End


  

data_complex 2

  

_audit_creation_method            SHELXL-97 

_chemical_name_systematic 

; 

 ? 

; 

_chemical_name_common             ? 

_chemical_melting_point           ? 

_chemical_formula_moiety          ? 

_chemical_formula_sum 

 'C45 H64 Al2 Cr N2 P2' 

_chemical_formula_weight          800.88 

  

loop_ 

 _atom_type_symbol 

 _atom_type_description 

 _atom_type_scat_dispersion_real 

 _atom_type_scat_dispersion_imag 

 _atom_type_scat_source 

 'C'  'C'   0.0033   0.0016 

 'International Tables Vol C Tables 4.2.6.8 and 6.1.1.4' 

 'H'  'H'   0.0000   0.0000 

 'International Tables Vol C Tables 4.2.6.8 and 6.1.1.4' 

 'N'  'N'   0.0061   0.0033 

 'International Tables Vol C Tables 4.2.6.8 and 6.1.1.4' 

 'Al'  'Al'   0.0645   0.0514 

 'International Tables Vol C Tables 4.2.6.8 and 6.1.1.4' 

 'P'  'P'   0.1023   0.0942 

 'International Tables Vol C Tables 4.2.6.8 and 6.1.1.4' 

 'Cr'  'Cr'   0.3209   0.6236 

 'International Tables Vol C Tables 4.2.6.8 and 6.1.1.4' 

  

_symmetry_cell_setting            Monoclinic 

_symmetry_space_group_name_H-M    P2(1)/c 

  

loop_ 

 _symmetry_equiv_pos_as_xyz 

 'x, y, z' 

 '-x, y+1/2, -z+1/2' 

 '-x, -y, -z' 

 'x, -y-1/2, z-1/2' 

  

_cell_length_a                    13.4386(7) 

_cell_length_b                    11.8712(7) 

_cell_length_c                    13.9683(7) 

_cell_angle_alpha                 90.00 

_cell_angle_beta                  93.458(2) 

_cell_angle_gamma                 90.00 

_cell_volume                      2224.3(2) 

_cell_formula_units_Z             2 

_cell_measurement_temperature     100(2) 

_cell_measurement_reflns_used     8217 

_cell_measurement_theta_min       2.25 

_cell_measurement_theta_max       27.33 

  

_exptl_crystal_description        block 

_exptl_crystal_colour             blue 

_exptl_crystal_size_max           0.20 

_exptl_crystal_size_mid           0.10 

_exptl_crystal_size_min           0.10 

_exptl_crystal_density_meas       n/a 

_exptl_crystal_density_diffrn     1.196 

_exptl_crystal_density_method     'not measured' 

_exptl_crystal_F_000              856 

_exptl_absorpt_coefficient_mu     0.401 

_exptl_absorpt_correction_type    multi-scan 

_exptl_absorpt_correction_T_min   0.9242 

_exptl_absorpt_correction_T_max   0.9610 

_exptl_absorpt_process_details    'SADABS, Bruker (2000)' 

  

_diffrn_ambient_temperature       100(2) 

_diffrn_radiation_wavelength      0.71073 

_diffrn_radiation_type            MoK\a 

_diffrn_radiation_source          'fine-focus sealed tube' 

_diffrn_radiation_monochromator   graphite 

_diffrn_measurement_device_type   'Bruker Kappa APEXII CCD' 

_diffrn_measurement_method        '\f & \w scans' 

_diffrn_detector_area_resol_mean  ? 

_diffrn_standards_number          ? 

_diffrn_standards_interval_count  ? 

_diffrn_standards_interval_time   ? 

_diffrn_standards_decay_%         <1 

_diffrn_reflns_number             52771 

_diffrn_reflns_av_R_equivalents   0.0629 

_diffrn_reflns_av_sigmaI/netI     0.0636 

_diffrn_reflns_limit_h_min        -18 

_diffrn_reflns_limit_h_max        18 

_diffrn_reflns_limit_k_min        -16 

_diffrn_reflns_limit_k_max        16 

_diffrn_reflns_limit_l_min        -19 

_diffrn_reflns_limit_l_max        17 

_diffrn_reflns_theta_min          1.52 

_diffrn_reflns_theta_max          30.06 

_reflns_number_total              6167 

_reflns_number_gt                 4332 

_reflns_threshold_expression      >2sigma(I) 

  

_computing_data_collection        'APEX2 (Bruker, 2006)' 

_computing_cell_refinement        'SAINT (Bruker, 2006)'

_computing_data_reduction         'SAINT (Bruker, 2006)' 

_computing_structure_solution     'SHELXS-97 (Sheldrick, 1990)' 

_computing_structure_refinement   'SHELXL-97 (Sheldrick, 1997)' 

_computing_molecular_graphics     'Bruker SHELXTL' 

_computing_publication_material   'Bruker SHELXTL' 

  

_refine_special_details 

; 

 Refinement of F^2^ against ALL reflections.  The weighted R-factor wR and 

 goodness of fit S are based on F^2^, conventional R-factors R are based 

 on F, with F set to zero for negative F^2^. The threshold expression of 

 F^2^ > 2sigma(F^2^) is used only for calculating R-factors(gt) etc. and is 

 not relevant to the choice of reflections for refinement.  R-factors based 

 on F^2^ are statistically about twice as large as those based on F, and R- 

 factors based on ALL data will be even larger. 

; 

  

_refine_ls_structure_factor_coef  Fsqd 

_refine_ls_matrix_type            full 

_refine_ls_weighting_scheme       calc 

_refine_ls_weighting_details 

 'calc w=1/[\s^2^(Fo^2^)+(0.0566P)^2^+0.9514P] where P=(Fo^2^+2Fc^2^)/3' 

_atom_sites_solution_primary      direct 

_atom_sites_solution_secondary    difmap 

_atom_sites_solution_hydrogens    geom 

_refine_ls_hydrogen_treatment     constrained 

_refine_ls_extinction_method      none 

_refine_ls_extinction_coef        ? 

_refine_ls_number_reflns          6167 

_refine_ls_number_parameters      268 

_refine_ls_number_restraints      0 

_refine_ls_R_factor_all           0.0838 

_refine_ls_R_factor_gt            0.0498 

_refine_ls_wR_factor_ref          0.1248 

_refine_ls_wR_factor_gt           0.1127 

_refine_ls_goodness_of_fit_ref    1.054 

_refine_ls_restrained_S_all       1.054 

_refine_ls_shift/su_max           0.001 

_refine_ls_shift/su_mean          0.000 

  

loop_ 

 _atom_site_label 

 _atom_site_type_symbol 

 _atom_site_fract_x 

 _atom_site_fract_y 

 _atom_site_fract_z 

 _atom_site_U_iso_or_equiv 

 _atom_site_adp_type 

 _atom_site_occupancy 

 _atom_site_symmetry_multiplicity 

 _atom_site_calc_flag 

 _atom_site_refinement_flags 

 _atom_site_disorder_assembly 

 _atom_site_disorder_group 

C1 C 0.49522(16) 0.98734(19) 0.83650(17) 0.0257(5) Uani 1 1 d . . . 

H1A H 0.4843 0.9441 0.8947 0.038 Uiso 1 1 calc R . . 

H1B H 0.5066 0.9355 0.7837 0.038 Uiso 1 1 calc R . . 

H1C H 0.4364 1.0336 0.8197 0.038 Uiso 1 1 calc R . . 

Al1 Al 0.61964(4) 1.09143(5) 0.86075(5) 0.01900(16) Uani 1 1 d . . . 

Cr1 Cr 0.5000 1.0000 1.0000 0.01271(12) Uani 1 2 d S . . 

N1 N 0.71993(11) 0.98782(13) 0.90399(12) 0.0142(3) Uani 1 1 d . . . 

P1 P 0.67630(3) 0.92500(4) 0.99788(4) 0.01268(12) Uani 1 1 d . . . 

C2 C 0.60455(17) 1.2130(2) 0.95923(17) 0.0313(5) Uani 1 1 d . . . 

H2A H 0.5841 1.2833 0.9270 0.047 Uiso 1 1 calc R . . 

H2B H 0.6684 1.2244 0.9957 0.047 Uiso 1 1 calc R . . 

H2C H 0.5538 1.1904 1.0030 0.047 Uiso 1 1 calc R . . 

C3 C 0.62833(18) 1.16962(19) 0.73740(17) 0.0298(5) Uani 1 1 d . . . 

H3A H 0.5801 1.2316 0.7332 0.045 Uiso 1 1 calc R . . 

H3B H 0.6134 1.1165 0.6848 0.045 Uiso 1 1 calc R . . 

H3C H 0.6958 1.1996 0.7328 0.045 Uiso 1 1 calc R . . 

C4 C 0.82450(14) 0.98698(17) 0.87178(15) 0.0181(4) Uani 1 1 d . . . 

C5 C 0.86971(16) 1.10393(19) 0.89062(18) 0.0278(5) Uani 1 1 d . . . 

H5A H 0.8271 1.1611 0.8583 0.042 Uiso 1 1 calc R . . 

H5B H 0.9363 1.1069 0.8658 0.042 Uiso 1 1 calc R . . 

H5C H 0.8746 1.1186 0.9598 0.042 Uiso 1 1 calc R . . 

C6 C 0.82010(16) 0.9620(2) 0.76429(16) 0.0285(5) Uani 1 1 d . . . 

H6A H 0.7913 0.8871 0.7524 0.043 Uiso 1 1 calc R . . 

H6B H 0.8876 0.9643 0.7414 0.043 Uiso 1 1 calc R . . 

H6C H 0.7786 1.0187 0.7301 0.043 Uiso 1 1 calc R . . 

C7 C 0.89210(15) 0.89988(19) 0.92264(16) 0.0240(5) Uani 1 1 d . . . 

H7A H 0.8644 0.8244 0.9110 0.036 Uiso 1 1 calc R . . 

H7B H 0.8966 0.9152 0.9917 0.036 Uiso 1 1 calc R . . 

H7C H 0.9587 0.9041 0.8979 0.036 Uiso 1 1 calc R . . 

C8 C 0.66845(13) 0.77243(16) 0.98373(15) 0.0175(4) Uani 1 1 d . . . 

C9 C 0.67936(14) 0.72168(18) 0.89531(17) 0.0231(5) Uani 1 1 d . . . 

H9A H 0.6982 0.7659 0.8427 0.028 Uiso 1 1 calc R . . 

C10 C 0.66302(17) 0.6071(2) 0.8831(2) 0.0354(6) Uani 1 1 d . . . 

H10A H 0.6726 0.5730 0.8228 0.042 Uiso 1 1 calc R . . 

C11 C 0.63303(17) 0.5428(2) 0.9579(2) 0.0421(7) Uani 1 1 d . . . 

H11A H 0.6211 0.4645 0.9491 0.050 Uiso 1 1 calc R . . 

C12 C 0.62019(16) 0.59230(19) 1.0461(2) 0.0362(6) Uani 1 1 d . . . 

H12A H 0.5991 0.5480 1.0977 0.043 Uiso 1 1 calc R . . 

C13 C 0.63812(15) 0.70628(18) 1.05895(18) 0.0253(5) Uani 1 1 d . . . 

H13A H 0.6296 0.7397 1.1197 0.030 Uiso 1 1 calc R . . 

C14 C 0.75936(13) 0.94529(17) 1.10573(14) 0.0154(4) Uani 1 1 d . . . 

C15 C 0.81431(14) 0.86003(17) 1.15250(15) 0.0188(4) Uani 1 1 d . . . 

H15A H 0.8082 0.7848 1.1298 0.023 Uiso 1 1 calc R . . 

C16 C 0.87814(15) 0.8840(2) 1.23216(15) 0.0248(5) Uani 1 1 d . . . 

H16A H 0.9152 0.8249 1.2633 0.030 Uiso 1 1 calc R . . 

C17 C 0.88798(15) 0.9925(2) 1.26604(16) 0.0265(5) Uani 1 1 d . . . 

H17A H 0.9312 1.0084 1.3207 0.032 Uiso 1 1 calc R . . 

C18 C 0.83439(16) 1.0784(2) 1.21992(17) 0.0266(5) Uani 1 1 d . . . 

H18A H 0.8420 1.1536 1.2423 0.032 Uiso 1 1 calc R . . 

C19 C 0.76974(15) 1.05511(18) 1.14134(15) 0.0206(4) Uani 1 1 d . . . 

H19A H 0.7320 1.1144 1.1113 0.025 Uiso 1 1 calc R . . 

C20 C 0.1533(4) 0.6311(5) 0.9623(4) 0.0437(14) Uani 0.50 1 d P A -1 

H20A H 0.1334 0.7102 0.9677 0.066 Uiso 0.50 1 calc PR A -1 

H20B H 0.1747 0.6168 0.8976 0.066 Uiso 0.50 1 calc PR A -1 

H20C H 0.2085 0.6151 1.0094 0.066 Uiso 0.50 1 calc PR A -1 

C21 C -0.0962(6) 0.4215(9) 1.0222(8) 0.0265(19) Uani 0.50 1 d P A -1 

H21A H -0.1507 0.3760 1.0390 0.032 Uiso 0.50 1 calc PR A -1 

C22 C -0.0067(7) 0.3721(10) 0.9955(10) 0.0261(19) Uani 0.50 1 d P A -1 

H22A H -0.0016 0.2925 0.9910 0.031 Uiso 0.50 1 calc PR A -1 

C23 C 0.0732(6) 0.4386(8) 0.9762(8) 0.0217(19) Uani 0.50 1 d P A -1 

H23A H 0.1337 0.4047 0.9593 0.026 Uiso 0.50 1 calc PR A -1 

C24 C -0.0235(7) 0.6034(8) 1.0045(8) 0.0220(19) Uani 0.50 1 d P A -1 

H24A H -0.0300 0.6830 1.0075 0.026 Uiso 0.50 1 calc PR A -1 

C25 C -0.1030(7) 0.5360(10) 1.0233(8) 0.026(2) Uani 0.50 1 d P A -1 

H25A H -0.1644 0.5701 1.0374 0.031 Uiso 0.50 1 calc PR A -1 

C26 C 0.0660(6) 0.5563(8) 0.9811(8) 0.0215(16) Uani 0.50 1 d P A -1 

  

loop_ 

 _atom_site_aniso_label 

 _atom_site_aniso_U_11 

 _atom_site_aniso_U_22 

 _atom_site_aniso_U_33 

 _atom_site_aniso_U_23 

 _atom_site_aniso_U_13 

 _atom_site_aniso_U_12 

C1 0.0207(10) 0.0317(12) 0.0239(12) 0.0056(10) -0.0042(9) -0.0018(9) 

Al1 0.0149(3) 0.0231(3) 0.0190(3) 0.0074(3) 0.0003(2) 0.0028(2) 

Cr1 0.0100(2) 0.0154(2) 0.0126(2) -0.00008(17) -0.00067(16) 0.00135(16) 

N1 0.0116(7) 0.0162(8) 0.0146(9) 0.0015(6) 0.0002(6) 0.0014(6) 

P1 0.0111(2) 0.0139(2) 0.0128(3) -0.00010(19) -0.00110(19) 0.00083(18) 

C2 0.0298(12) 0.0294(12) 0.0341(14) -0.0022(10) -0.0026(11) 0.0088(10) 

C3 0.0328(12) 0.0274(12) 0.0291(13) 0.0120(10) 0.0010(10) 0.0011(10) 

C4 0.0131(9) 0.0257(11) 0.0154(11) 0.0018(8) 0.0015(8) 0.0006(8) 

C5 0.0191(10) 0.0303(12) 0.0339(14) 0.0016(10) 0.0026(10) -0.0052(9) 

C6 0.0213(11) 0.0458(14) 0.0187(12) 0.0004(10) 0.0047(9) 0.0050(10) 

C7 0.0137(9) 0.0337(12) 0.0247(12) 0.0031(10) 0.0026(9) 0.0057(9) 

C8 0.0112(8) 0.0160(9) 0.0247(12) 0.0004(8) -0.0044(8) 0.0009(7) 

C9 0.0159(10) 0.0233(11) 0.0295(13) -0.0074(9) -0.0047(9) 0.0022(8) 

C10 0.0237(11) 0.0253(12) 0.0552(18) -0.0187(12) -0.0132(11) 0.0037(9) 

C11 0.0234(12) 0.0153(11) 0.086(2) -0.0062(13) -0.0123(13) -0.0013(9) 

C12 0.0201(11) 0.0215(12) 0.066(2) 0.0149(12) -0.0029(12) -0.0030(9) 

C13 0.0188(10) 0.0207(11) 0.0361(14) 0.0070(10) -0.0002(9) 0.0011(8) 

C14 0.0121(9) 0.0218(10) 0.0125(10) 0.0006(8) 0.0010(7) -0.0011(7) 

C15 0.0160(9) 0.0238(11) 0.0165(11) 0.0035(8) 0.0008(8) 0.0012(8) 

C16 0.0188(10) 0.0376(13) 0.0177(12) 0.0072(10) -0.0005(9) 0.0007(9) 

C17 0.0159(10) 0.0500(15) 0.0133(11) -0.0003(10) -0.0024(8) -0.0047(9) 

C18 0.0242(11) 0.0317(12) 0.0239(12) -0.0084(10) 0.0005(9) -0.0050(9) 

C19 0.0180(10) 0.0231(11) 0.0202(12) -0.0030(9) -0.0017(8) 0.0000(8) 

C20 0.039(3) 0.040(3) 0.053(4) -0.015(3) 0.014(3) -0.007(3) 

C21 0.022(5) 0.039(5) 0.019(3) 0.004(3) 0.000(3) -0.014(3) 

C22 0.029(5) 0.020(4) 0.027(3) 0.000(3) -0.013(4) -0.007(3) 

C23 0.020(5) 0.016(4) 0.028(4) -0.010(3) -0.017(4) 0.003(3) 

C24 0.021(5) 0.018(5) 0.026(4) -0.008(4) -0.013(4) 0.003(3) 

C25 0.019(4) 0.044(6) 0.013(3) -0.008(3) -0.008(3) 0.003(3) 

C26 0.021(4) 0.028(4) 0.016(3) 0.004(3) 0.001(3) -0.007(3) 

  

_geom_special_details 

; 

 All esds (except the esd in the dihedral angle between two l.s. planes) 

 are estimated using the full covariance matrix.  The cell esds are taken 

 into account individually in the estimation of esds in distances, angles 

 and torsion angles; correlations between esds in cell parameters are only 

 used when they are defined by crystal symmetry.  An approximate (isotropic) 

 treatment of cell esds is used for estimating esds involving l.s. planes. 

; 

  

loop_ 

 _geom_bond_atom_site_label_1 

 _geom_bond_atom_site_label_2 

 _geom_bond_distance 

 _geom_bond_site_symmetry_2 

 _geom_bond_publ_flag 

C1 Al1 2.090(2) . ? 

Al1 N1 1.8963(16) . ? 

Al1 C3 1.967(2) . ? 

Al1 C2 2.012(2) . ? 

Al1 Cr1 2.8149(6) . ? 

Al1 P1 2.8243(8) . ? 

Cr1 C1 2.286(2) 3_677 ? 

Cr1 P1 2.5328(5) 3_677 ? 

Cr1 P1 2.5328(5) . ? 

Cr1 Al1 2.8149(6) 3_677 ? 

N1 C4 1.501(2) . ? 

N1 P1 1.6471(17) . ? 

P1 C8 1.824(2) . ? 

P1 C14 1.836(2) . ? 

C4 C7 1.524(3) . ? 

C4 C6 1.528(3) . ? 

C4 C5 1.532(3) . ? 

C8 C9 1.390(3) . ? 

C8 C13 1.392(3) . ? 

C9 C10 1.386(3) . ? 

C10 C11 1.374(4) . ? 

C11 C12 1.385(4) . ? 

C12 C13 1.384(3) . ? 

C14 C15 1.392(3) . ? 

C14 C19 1.399(3) . ? 

C15 C16 1.393(3) . ? 

C16 C17 1.376(3) . ? 

C17 C18 1.385(3) . ? 

C18 C19 1.386(3) . ? 

C20 C26 1.507(8) . ? 

C21 C25 1.362(17) . ? 

C21 C22 1.409(16) . ? 

C22 C23 1.373(9) . ? 

C23 C26 1.402(15) . ? 

C24 C25 1.373(9) . ? 

C24 C26 1.384(14) . ? 

  

loop_ 

 _geom_angle_atom_site_label_1 

 _geom_angle_atom_site_label_2 

 _geom_angle_atom_site_label_3 

 _geom_angle 

 _geom_angle_site_symmetry_1 

 _geom_angle_site_symmetry_3 

 _geom_angle_publ_flag 

N1 Al1 C3 120.43(9) . . ? 

N1 Al1 C2 110.26(9) . . ? 

C3 Al1 C2 105.93(11) . . ? 

N1 Al1 C1 102.38(8) . . ? 

C3 Al1 C1 103.07(10) . . ? 

C2 Al1 C1 114.96(10) . . ? 

N1 Al1 Cr1 87.39(5) . . ? 

C3 Al1 Cr1 148.64(7) . . ? 

C2 Al1 Cr1 73.66(7) . . ? 

C1 Al1 Cr1 53.08(7) . . ? 

N1 Al1 P1 34.20(5) . . ? 

C3 Al1 P1 153.70(8) . . ? 

C2 Al1 P1 94.13(7) . . ? 

C1 Al1 P1 82.91(6) . . ? 

Cr1 Al1 P1 53.378(15) . . ? 

C1 Cr1 P1 86.28(6) 3_677 3_677 ? 

C1 Cr1 P1 93.72(6) 3_677 . ? 

P1 Cr1 P1 180.0 3_677 . ? 

C1 Cr1 Al1 133.02(5) 3_677 . ? 

P1 Cr1 Al1 116.500(17) 3_677 . ? 

P1 Cr1 Al1 63.501(17) . . ? 

C1 Cr1 Al1 46.98(5) 3_677 3_677 ? 

P1 Cr1 Al1 63.502(17) 3_677 3_677 ? 

P1 Cr1 Al1 116.497(17) . 3_677 ? 

Al1 Cr1 Al1 180.0 . 3_677 ? 

C4 N1 P1 128.34(13) . . ? 

C4 N1 Al1 124.68(13) . . ? 

P1 N1 Al1 105.48(8) . . ? 

N1 P1 C8 112.59(9) . . ? 

N1 P1 C14 111.47(9) . . ? 

C8 P1 C14 104.33(9) . . ? 

N1 P1 Cr1 103.20(6) . . ? 

C8 P1 Cr1 107.59(6) . . ? 

C14 P1 Cr1 117.85(6) . . ? 

N1 P1 Al1 40.32(6) . . ? 

C8 P1 Al1 127.56(7) . . ? 

C14 P1 Al1 126.19(7) . . ? 

Cr1 P1 Al1 63.121(16) . . ? 

N1 C4 C7 114.04(17) . . ? 

N1 C4 C6 108.33(16) . . ? 

C7 C4 C6 108.26(17) . . ? 

N1 C4 C5 108.14(16) . . ? 

C7 C4 C5 108.41(17) . . ? 

C6 C4 C5 109.62(18) . . ? 

C9 C8 C13 118.5(2) . . ? 

C9 C8 P1 121.21(16) . . ? 

C13 C8 P1 119.72(16) . . ? 

C10 C9 C8 120.7(2) . . ? 

C11 C10 C9 120.2(2) . . ? 

C10 C11 C12 119.9(2) . . ? 

C13 C12 C11 120.0(2) . . ? 

C12 C13 C8 120.6(2) . . ? 

C15 C14 C19 118.15(18) . . ? 

C15 C14 P1 124.66(16) . . ? 

C19 C14 P1 117.16(15) . . ? 

C14 C15 C16 120.7(2) . . ? 

C17 C16 C15 120.5(2) . . ? 

C16 C17 C18 119.5(2) . . ? 

C17 C18 C19 120.4(2) . . ? 

C18 C19 C14 120.8(2) . . ? 

C25 C21 C22 118.5(7) . . ? 

C23 C22 C21 120.2(10) . . ? 

C22 C23 C26 120.4(9) . . ? 

C25 C24 C26 120.5(8) . . ? 

C21 C25 C24 121.7(10) . . ? 

C24 C26 C23 118.5(7) . . ? 

C24 C26 C20 119.9(8) . . ? 

C23 C26 C20 121.5(8) . . ? 

  

loop_ 

 _geom_torsion_atom_site_label_1 

 _geom_torsion_atom_site_label_2 

 _geom_torsion_atom_site_label_3 

 _geom_torsion_atom_site_label_4 

 _geom_torsion 

 _geom_torsion_site_symmetry_1 

 _geom_torsion_site_symmetry_2 

 _geom_torsion_site_symmetry_3 

 _geom_torsion_site_symmetry_4 

 _geom_torsion_publ_flag 

N1 Al1 Cr1 C1 72.38(10) . . . 3_677 ? 

C3 Al1 Cr1 C1 -133.55(17) . . . 3_677 ? 

C2 Al1 Cr1 C1 -39.62(10) . . . 3_677 ? 

C1 Al1 Cr1 C1 180.0 . . . 3_677 ? 

P1 Al1 Cr1 C1 68.52(8) . . . 3_677 ? 

N1 Al1 Cr1 P1 -176.14(5) . . . 3_677 ? 

C3 Al1 Cr1 P1 -22.07(15) . . . 3_677 ? 

C2 Al1 Cr1 P1 71.86(7) . . . 3_677 ? 

C1 Al1 Cr1 P1 -68.52(8) . . . 3_677 ? 

P1 Al1 Cr1 P1 180.0 . . . 3_677 ? 

N1 Al1 Cr1 P1 3.86(5) . . . . ? 

C3 Al1 Cr1 P1 157.93(15) . . . . ? 

C2 Al1 Cr1 P1 -108.14(7) . . . . ? 

C1 Al1 Cr1 P1 111.48(8) . . . . ? 

N1 Al1 Cr1 Al1 19(10) . . . 3_677 ? 

C3 Al1 Cr1 Al1 174(10) . . . 3_677 ? 

C2 Al1 Cr1 Al1 -93(10) . . . 3_677 ? 

C1 Al1 Cr1 Al1 127(10) . . . 3_677 ? 

P1 Al1 Cr1 Al1 16(10) . . . 3_677 ? 

C3 Al1 N1 C4 22.77(19) . . . . ? 

C2 Al1 N1 C4 -101.01(17) . . . . ? 

C1 Al1 N1 C4 136.19(16) . . . . ? 

Cr1 Al1 N1 C4 -172.53(15) . . . . ? 

P1 Al1 N1 C4 -167.0(2) . . . . ? 

C3 Al1 N1 P1 -170.21(10) . . . . ? 

C2 Al1 N1 P1 66.00(11) . . . . ? 

C1 Al1 N1 P1 -56.79(11) . . . . ? 

Cr1 Al1 N1 P1 -5.51(7) . . . . ? 

C4 N1 P1 C8 -71.61(18) . . . . ? 

Al1 N1 P1 C8 122.01(9) . . . . ? 

C4 N1 P1 C14 45.24(19) . . . . ? 

Al1 N1 P1 C14 -121.14(9) . . . . ? 

C4 N1 P1 Cr1 172.67(15) . . . . ? 

Al1 N1 P1 Cr1 6.29(8) . . . . ? 

C4 N1 P1 Al1 166.4(2) . . . . ? 

C1 Cr1 P1 N1 -141.57(8) 3_677 . . . ? 

P1 Cr1 P1 N1 112(4) 3_677 . . . ? 

Al1 Cr1 P1 N1 -4.56(6) . . . . ? 

Al1 Cr1 P1 N1 175.44(6) 3_677 . . . ? 

C1 Cr1 P1 C8 99.19(9) 3_677 . . . ? 

P1 Cr1 P1 C8 -7(4) 3_677 . . . ? 

Al1 Cr1 P1 C8 -123.79(7) . . . . ? 

Al1 Cr1 P1 C8 56.21(7) 3_677 . . . ? 

C1 Cr1 P1 C14 -18.27(9) 3_677 . . . ? 

P1 Cr1 P1 C14 -125(4) 3_677 . . . ? 

Al1 Cr1 P1 C14 118.74(7) . . . . ? 

Al1 Cr1 P1 C14 -61.26(7) 3_677 . . . ? 

C1 Cr1 P1 Al1 -137.01(6) 3_677 . . . ? 

P1 Cr1 P1 Al1 117(4) 3_677 . . . ? 

Al1 Cr1 P1 Al1 180.0 3_677 . . . ? 

C3 Al1 P1 N1 19.32(19) . . . . ? 

C2 Al1 P1 N1 -120.77(11) . . . . ? 

C1 Al1 P1 N1 124.56(11) . . . . ? 

Cr1 Al1 P1 N1 173.13(9) . . . . ? 

N1 Al1 P1 C8 -80.97(12) . . . . ? 

C3 Al1 P1 C8 -61.6(2) . . . . ? 

C2 Al1 P1 C8 158.27(10) . . . . ? 

C1 Al1 P1 C8 43.60(11) . . . . ? 

Cr1 Al1 P1 C8 92.16(8) . . . . ? 

N1 Al1 P1 C14 80.72(12) . . . . ? 

C3 Al1 P1 C14 100.04(19) . . . . ? 

C2 Al1 P1 C14 -40.05(11) . . . . ? 

C1 Al1 P1 C14 -154.72(10) . . . . ? 

Cr1 Al1 P1 C14 -106.15(8) . . . . ? 

N1 Al1 P1 Cr1 -173.13(9) . . . . ? 

C3 Al1 P1 Cr1 -153.81(18) . . . . ? 

C2 Al1 P1 Cr1 66.10(7) . . . . ? 

C1 Al1 P1 Cr1 -48.57(7) . . . . ? 

P1 N1 C4 C7 12.1(3) . . . . ? 

Al1 N1 C4 C7 176.10(14) . . . . ? 

P1 N1 C4 C6 132.73(17) . . . . ? 

Al1 N1 C4 C6 -63.3(2) . . . . ? 

P1 N1 C4 C5 -108.54(18) . . . . ? 

Al1 N1 C4 C5 55.4(2) . . . . ? 

N1 P1 C8 C9 -12.08(18) . . . . ? 

C14 P1 C8 C9 -133.11(16) . . . . ? 

Cr1 P1 C8 C9 100.96(15) . . . . ? 

Al1 P1 C8 C9 31.72(19) . . . . ? 

N1 P1 C8 C13 176.51(15) . . . . ? 

C14 P1 C8 C13 55.49(17) . . . . ? 

Cr1 P1 C8 C13 -70.45(16) . . . . ? 

Al1 P1 C8 C13 -139.69(14) . . . . ? 

C13 C8 C9 C10 -1.7(3) . . . . ? 

P1 C8 C9 C10 -173.23(16) . . . . ? 

C8 C9 C10 C11 1.8(3) . . . . ? 

C9 C10 C11 C12 -0.7(3) . . . . ? 

C10 C11 C12 C13 -0.4(3) . . . . ? 

C11 C12 C13 C8 0.4(3) . . . . ? 

C9 C8 C13 C12 0.6(3) . . . . ? 

P1 C8 C13 C12 172.25(16) . . . . ? 

N1 P1 C14 C15 -112.30(17) . . . . ? 

C8 P1 C14 C15 9.47(19) . . . . ? 

Cr1 P1 C14 C15 128.67(16) . . . . ? 

Al1 P1 C14 C15 -155.63(14) . . . . ? 

N1 P1 C14 C19 65.87(17) . . . . ? 

C8 P1 C14 C19 -172.35(15) . . . . ? 

Cr1 P1 C14 C19 -53.16(17) . . . . ? 

Al1 P1 C14 C19 22.54(19) . . . . ? 

C19 C14 C15 C16 -0.4(3) . . . . ? 

P1 C14 C15 C16 177.80(15) . . . . ? 

C14 C15 C16 C17 0.0(3) . . . . ? 

C15 C16 C17 C18 -0.5(3) . . . . ? 

C16 C17 C18 C19 1.3(3) . . . . ? 

C17 C18 C19 C14 -1.7(3) . . . . ? 

C15 C14 C19 C18 1.2(3) . . . . ? 

P1 C14 C19 C18 -177.12(16) . . . . ? 

C25 C21 C22 C23 3.4(16) . . . . ? 

C21 C22 C23 C26 -1.1(15) . . . . ? 

C22 C21 C25 C24 -3.7(16) . . . . ? 

C26 C24 C25 C21 1.7(15) . . . . ? 

C25 C24 C26 C23 0.7(14) . . . . ? 

C25 C24 C26 C20 -179.0(9) . . . . ? 

C22 C23 C26 C24 -1.0(14) . . . . ? 

C22 C23 C26 C20 178.7(9) . . . . ? 

  

_diffrn_measured_fraction_theta_max    0.946 

_diffrn_reflns_theta_full              30.06 

_diffrn_measured_fraction_theta_full   0.946 

_refine_diff_density_max    0.712 

_refine_diff_density_min   -0.586 

_refine_diff_density_rms    0.079 


                                    # = = = End


data_complex 3
 
_audit_creation_method            SHELXL-97
_chemical_name_systematic
;
 ?
;
_chemical_name_common             ?
_chemical_melting_point           ?
_chemical_formula_moiety          ?
_chemical_formula_sum
 'C43 H58 Al2 Cl2 Cr N2 P2'
_chemical_formula_weight          841.71
 
loop_
 _atom_type_symbol
 _atom_type_description
 _atom_type_scat_dispersion_real
 _atom_type_scat_dispersion_imag
 _atom_type_scat_source
 'C'  'C'   0.0033   0.0016
 'International Tables Vol C Tables 4.2.6.8 and 6.1.1.4'
 'H'  'H'   0.0000   0.0000
 'International Tables Vol C Tables 4.2.6.8 and 6.1.1.4'
 'N'  'N'   0.0061   0.0033
 'International Tables Vol C Tables 4.2.6.8 and 6.1.1.4'
 'P'  'P'   0.1023   0.0942
 'International Tables Vol C Tables 4.2.6.8 and 6.1.1.4'
 'Cl'  'Cl'   0.1484   0.1585
 'International Tables Vol C Tables 4.2.6.8 and 6.1.1.4'
 'Cr'  'Cr'   0.3209   0.6236
 'International Tables Vol C Tables 4.2.6.8 and 6.1.1.4'
 'Al'  'Al'   0.0645   0.0514
 'International Tables Vol C Tables 4.2.6.8 and 6.1.1.4'
 
_symmetry_cell_setting            Triclinic
_symmetry_space_group_name_H-M    P-1
 
loop_
 _symmetry_equiv_pos_as_xyz
 'x, y, z'
 '-x, -y, -z'
 
_cell_length_a                    9.3772(15)
_cell_length_b                    11.5117(19)
_cell_length_c                    11.6769(19)
_cell_angle_alpha                 112.718(3)
_cell_angle_beta                  98.557(3)
_cell_angle_gamma                 100.060(3)
_cell_volume                      1111.9(3)
_cell_formula_units_Z             1
_cell_measurement_temperature     202(2)
_cell_measurement_reflns_used     3245
_cell_measurement_theta_min       2.61
_cell_measurement_theta_max       24.77
 
_exptl_crystal_description        Block
_exptl_crystal_colour             Blue
_exptl_crystal_size_max           0.20
_exptl_crystal_size_mid           0.20
_exptl_crystal_size_min           0.10
_exptl_crystal_density_meas       n/a
_exptl_crystal_density_diffrn     1.257
_exptl_crystal_density_method     'not measured'
_exptl_crystal_F_000              444
_exptl_absorpt_coefficient_mu     0.520
_exptl_absorpt_correction_type    multi-scan
_exptl_absorpt_correction_T_min   0.9031
_exptl_absorpt_correction_T_max   0.9498
_exptl_absorpt_process_details    'SADABS (Sheldrick, 2003)'
 
_exptl_special_details
;
Data collection is performed with four batch runs at
\f = 0.00 \% (600 frames), at \f = 90.00 \%
(600 frames), at \f = 180 \% (600 frames) and
at \f = 270 \% (600 frames).
Frame width = 0.30 \& in \w. Data is
merged, corrected for decay, and treated with
multi-scan absorption corrections.
;
 
_diffrn_ambient_temperature       202(2)
_diffrn_radiation_wavelength      0.71073
_diffrn_radiation_type            MoK\a
_diffrn_radiation_source          'fine-focus sealed tube'
_diffrn_radiation_monochromator   graphite
_diffrn_measurement_device_type   'Bruker AXS APEX diffractometer'
_diffrn_measurement_method        \w
_diffrn_detector_area_resol_mean  836.6
_diffrn_standards_number          0
_diffrn_standards_interval_count  0
_diffrn_standards_interval_time   0
_diffrn_standards_decay_%         1
_diffrn_reflns_number             8915
_diffrn_reflns_av_R_equivalents   0.0296
_diffrn_reflns_av_sigmaI/netI     0.0434
_diffrn_reflns_limit_h_min        -11
_diffrn_reflns_limit_h_max        11
_diffrn_reflns_limit_k_min        -12
_diffrn_reflns_limit_k_max        13
_diffrn_reflns_limit_l_min        -13
_diffrn_reflns_limit_l_max        13
_diffrn_reflns_theta_min          2.11
_diffrn_reflns_theta_max          24.77
_reflns_number_total              3760
_reflns_number_gt                 2850
_reflns_threshold_expression      >2sigma(I)
 
_computing_data_collection        'SMART (Bruker, 2002)'
_computing_cell_refinement        'SAINT (Bruker, 2002)'
_computing_data_reduction         SAINT
_computing_structure_solution     'SHELXS-97 (Sheldrick, 1990)'
_computing_structure_refinement   'SHELXL-97 (Sheldrick, 1997)'
_computing_molecular_graphics     'SHELXTL (Sheldrick, 2001)'
_computing_publication_material   'SHELXTL (Sheldrick, 2001)'
 
_refine_special_details
;
 Refinement of F^2^ against ALL reflections.  The weighted R-factor wR and
 goodness of fit S are based on F^2^, conventional R-factors R are based
 on F, with F set to zero for negative F^2^. The threshold expression of
 F^2^ > 2sigma(F^2^) is used only for calculating R-factors(gt) etc. and is
 not relevant to the choice of reflections for refinement.  R-factors based
 on F^2^ are statistically about twice as large as those based on F, and R-
 factors based on ALL data will be even larger.
;
 
_refine_ls_structure_factor_coef  Fsqd
_refine_ls_matrix_type            full
_refine_ls_weighting_scheme       calc
_refine_ls_weighting_details
 'calc w=1/[\s^2^(Fo^2^)+(0.0741P)^2^+0.4268P] where P=(Fo^2^+2Fc^2^)/3'
_atom_sites_solution_primary      direct
_atom_sites_solution_secondary    difmap
_atom_sites_solution_hydrogens    geom
_refine_ls_hydrogen_treatment     constr
_refine_ls_extinction_method      none
_refine_ls_extinction_coef        ?
_refine_ls_number_reflns          3760
_refine_ls_number_parameters      261
_refine_ls_number_restraints      63
_refine_ls_R_factor_all           0.0654
_refine_ls_R_factor_gt            0.0454
_refine_ls_wR_factor_ref          0.1323
_refine_ls_wR_factor_gt           0.1220
_refine_ls_goodness_of_fit_ref    1.058
_refine_ls_restrained_S_all       1.055
_refine_ls_shift/su_max           0.000
_refine_ls_shift/su_mean          0.000
 
loop_
 _atom_site_label
 _atom_site_type_symbol
 _atom_site_fract_x
 _atom_site_fract_y
 _atom_site_fract_z
 _atom_site_U_iso_or_equiv
 _atom_site_adp_type
 _atom_site_occupancy
 _atom_site_symmetry_multiplicity
 _atom_site_calc_flag
 _atom_site_refinement_flags
 _atom_site_disorder_assembly
 _atom_site_disorder_group
Cr Cr 0.5000 0.5000 0.5000 0.0285(2) Uani 1 2 d S . .
N1 N 0.3480(3) 0.3178(3) 0.1728(2) 0.0310(6) Uani 1 1 d . . .
P1 P 0.28272(8) 0.38345(8) 0.29979(7) 0.0272(2) Uani 1 1 d . . .
Cl Cl 0.64229(9) 0.36885(9) 0.38702(8) 0.0448(3) Uani 1 1 d . . .
Al Al 0.55220(10) 0.39983(10) 0.20697(9) 0.0357(3) Uani 1 1 d . . .
C1 C 0.6807(4) 0.3279(5) 0.0959(4) 0.0582(11) Uani 1 1 d . . .
H1A H 0.6567 0.3402 0.0174 0.087 Uiso 1 1 calc R . .
H1B H 0.6647 0.2347 0.0743 0.087 Uiso 1 1 calc R . .
H1C H 0.7852 0.3726 0.1402 0.087 Uiso 1 1 calc R . .
C2 C 0.5831(4) 0.5906(4) 0.2772(4) 0.0551(11) Uani 1 1 d . . .
H2A H 0.5448 0.6148 0.2091 0.083 Uiso 1 1 calc R . .
H2B H 0.6898 0.6329 0.3121 0.083 Uiso 1 1 calc R . .
H2C H 0.5299 0.6188 0.3452 0.083 Uiso 1 1 calc R . .
C3 C 0.2640(4) 0.2064(3) 0.0454(3) 0.0363(8) Uani 1 1 d . . .
C4 C 0.0943(4) 0.1819(4) 0.0231(3) 0.0452(9) Uani 1 1 d . . .
H4A H 0.0664 0.2637 0.0375 0.068 Uiso 1 1 calc R . .
H4B H 0.0603 0.1483 0.0824 0.068 Uiso 1 1 calc R . .
H4C H 0.0477 0.1180 -0.0651 0.068 Uiso 1 1 calc R . .
C5 C 0.3074(5) 0.0833(4) 0.0401(4) 0.0569(11) Uani 1 1 d . . .
H5A H 0.4149 0.0954 0.0468 0.085 Uiso 1 1 calc R . .
H5B H 0.2530 0.0098 -0.0411 0.085 Uiso 1 1 calc R . .
H5C H 0.2822 0.0653 0.1111 0.085 Uiso 1 1 calc R . .
C6 C 0.3083(4) 0.2402(4) -0.0603(3) 0.0517(10) Uani 1 1 d . . .
H6A H 0.2824 0.3211 -0.0536 0.078 Uiso 1 1 calc R . .
H6B H 0.2549 0.1695 -0.1436 0.078 Uiso 1 1 calc R . .
H6C H 0.4159 0.2517 -0.0518 0.078 Uiso 1 1 calc R . .
C7 C 0.0819(3) 0.5420(3) 0.3614(3) 0.0349(8) Uani 1 1 d . . .
H7A H 0.0787 0.5191 0.4311 0.042 Uiso 1 1 calc R . .
C8 C 0.0036(4) 0.6282(4) 0.3467(3) 0.0441(9) Uani 1 1 d . . .
H8A H -0.0550 0.6629 0.4050 0.053 Uiso 1 1 calc R . .
C9 C 0.0106(4) 0.6642(3) 0.2462(4) 0.0463(9) Uani 1 1 d . . .
H9A H -0.0421 0.7246 0.2367 0.056 Uiso 1 1 calc R . .
C10 C 0.0937(4) 0.6127(4) 0.1609(3) 0.0459(9) Uani 1 1 d . . .
H10A H 0.0977 0.6368 0.0920 0.055 Uiso 1 1 calc R . .
C11 C 0.1721(4) 0.5251(3) 0.1756(3) 0.0357(8) Uani 1 1 d . . .
H11A H 0.2305 0.4903 0.1172 0.043 Uiso 1 1 calc R . .
C12 C 0.1653(3) 0.4883(3) 0.2755(3) 0.0294(7) Uani 1 1 d . . .
C13 C 0.0045(3) 0.2376(3) 0.3056(3) 0.0358(8) Uani 1 1 d . . .
H13A H -0.0440 0.2900 0.2758 0.043 Uiso 1 1 calc R . .
C14 C -0.0791(4) 0.1388(3) 0.3269(3) 0.0430(9) Uani 1 1 d . . .
H14A H -0.1845 0.1239 0.3113 0.052 Uiso 1 1 calc R . .
C15 C -0.0100(4) 0.0626(4) 0.3706(3) 0.0471(9) Uani 1 1 d . . .
H15A H -0.0676 -0.0046 0.3852 0.057 Uiso 1 1 calc R . .
C16 C 0.1413(4) 0.0838(4) 0.3927(4) 0.0498(10) Uani 1 1 d . . .
H16A H 0.1886 0.0306 0.4221 0.060 Uiso 1 1 calc R . .
C17 C 0.2265(4) 0.1820(3) 0.3726(3) 0.0396(8) Uani 1 1 d . . .
H17A H 0.3319 0.1962 0.3895 0.048 Uiso 1 1 calc R . .
C18 C 0.1594(3) 0.2601(3) 0.3279(3) 0.0309(7) Uani 1 1 d . . .
C19 C 0.4178(8) -0.0973(5) 0.4885(7) 0.061(3) Uani 0.50 1 d PGDU A -1
H19A H 0.3530 -0.1821 0.4548 0.073 Uiso 0.50 1 calc PR A -1
C20 C 0.4666(9) -0.0246(8) 0.6199(6) 0.080(3) Uani 0.50 1 d PGDU A -1
H20A H 0.4352 -0.0597 0.6762 0.096 Uiso 0.50 1 calc PR A -1
C21 C 0.5613(10) 0.0995(8) 0.6692(6) 0.084(4) Uani 0.50 1 d PGDU A -1
H21A H 0.5947 0.1492 0.7591 0.100 Uiso 0.50 1 calc PR A -1
C22 C 0.6073(9) 0.1510(6) 0.5870(9) 0.082(3) Uani 0.50 1 d PGDU A -1
H22A H 0.6721 0.2358 0.6206 0.098 Uiso 0.50 1 calc PR A -1
C23 C 0.5585(9) 0.0783(7) 0.4555(8) 0.084(4) Uani 0.50 1 d PGDU A -1
H23A H 0.5899 0.1135 0.3992 0.101 Uiso 0.50 1 calc PR A -1
C24 C 0.4637(9) -0.0458(7) 0.4062(5) 0.066(3) Uani 0.50 1 d PGDU A -1
C25 C 0.418(2) -0.1230(15) 0.2638(12) 0.140(7) Uani 0.50 1 d PDU A -1
H25A H 0.4636 -0.0712 0.2227 0.210 Uiso 0.50 1 calc PR A -1
H25B H 0.3095 -0.1452 0.2350 0.210 Uiso 0.50 1 calc PR A -1
H25C H 0.4522 -0.2032 0.2407 0.210 Uiso 0.50 1 calc PR A -1
 
loop_
 _atom_site_aniso_label
 _atom_site_aniso_U_11
 _atom_site_aniso_U_22
 _atom_site_aniso_U_33
 _atom_site_aniso_U_23
 _atom_site_aniso_U_13
 _atom_site_aniso_U_12
Cr 0.0240(4) 0.0313(4) 0.0274(4) 0.0105(3) 0.0016(3) 0.0090(3)
N1 0.0239(13) 0.0380(15) 0.0273(14) 0.0105(12) 0.0037(11) 0.0085(11)
P1 0.0230(4) 0.0326(5) 0.0260(4) 0.0124(4) 0.0033(3) 0.0094(3)
Cl 0.0380(5) 0.0602(6) 0.0341(5) 0.0141(4) 0.0035(4) 0.0248(4)
Al 0.0266(5) 0.0414(6) 0.0374(6) 0.0144(5) 0.0067(4) 0.0108(4)
C1 0.037(2) 0.085(3) 0.046(2) 0.021(2) 0.0130(18) 0.015(2)
C2 0.036(2) 0.046(2) 0.085(3) 0.031(2) 0.012(2) 0.0057(18)
C3 0.0349(18) 0.0391(19) 0.0254(16) 0.0070(14) 0.0005(14) 0.0079(15)
C4 0.038(2) 0.049(2) 0.0328(18) 0.0081(16) 0.0003(16) 0.0020(17)
C5 0.069(3) 0.043(2) 0.047(2) 0.0070(18) 0.003(2) 0.023(2)
C6 0.043(2) 0.071(3) 0.0296(19) 0.0126(18) 0.0046(16) 0.0075(19)
C7 0.0267(16) 0.0428(19) 0.0292(17) 0.0108(15) 0.0002(14) 0.0100(15)
C8 0.0306(18) 0.048(2) 0.042(2) 0.0066(17) 0.0005(15) 0.0167(16)
C9 0.042(2) 0.041(2) 0.050(2) 0.0133(18) -0.0036(18) 0.0211(17)
C10 0.048(2) 0.046(2) 0.043(2) 0.0220(18) -0.0019(18) 0.0149(18)
C11 0.0315(17) 0.0406(19) 0.0338(18) 0.0154(15) 0.0044(14) 0.0098(15)
C12 0.0240(15) 0.0300(16) 0.0301(16) 0.0118(14) -0.0008(13) 0.0056(13)
C13 0.0295(17) 0.0412(19) 0.0358(18) 0.0166(16) 0.0044(14) 0.0085(15)
C14 0.0346(19) 0.050(2) 0.0371(19) 0.0138(17) 0.0082(16) 0.0026(17)
C15 0.056(2) 0.041(2) 0.041(2) 0.0176(17) 0.0156(18) 0.0011(18)
C16 0.060(3) 0.048(2) 0.056(2) 0.033(2) 0.017(2) 0.022(2)
C17 0.0347(18) 0.046(2) 0.043(2) 0.0221(17) 0.0077(16) 0.0127(16)
C18 0.0310(17) 0.0344(17) 0.0252(16) 0.0107(14) 0.0070(13) 0.0074(14)
C19 0.030(5) 0.023(5) 0.123(9) 0.030(5) 0.004(6) 0.005(4)
C20 0.044(6) 0.094(8) 0.127(8) 0.066(7) 0.028(6) 0.026(6)
C21 0.070(8) 0.058(7) 0.108(11) 0.007(7) 0.033(9) 0.038(5)
C22 0.052(7) 0.050(6) 0.137(10) 0.030(6) 0.020(7) 0.022(5)
C23 0.052(8) 0.072(7) 0.140(11) 0.055(7) 0.018(8) 0.026(5)
C24 0.054(6) 0.057(6) 0.092(7) 0.022(5) 0.024(6) 0.043(5)
C25 0.158(15) 0.141(13) 0.102(9) 0.013(8) 0.043(10) 0.070(10)
 
_geom_special_details
;
 All esds (except the esd in the dihedral angle between two l.s. planes)
 are estimated using the full covariance matrix.  The cell esds are taken
 into account individually in the estimation of esds in distances, angles
 and torsion angles; correlations between esds in cell parameters are only
 used when they are defined by crystal symmetry.  An approximate (isotropic)
 treatment of cell esds is used for estimating esds involving l.s. planes.
;
 
loop_
 _geom_bond_atom_site_label_1
 _geom_bond_atom_site_label_2
 _geom_bond_distance
 _geom_bond_site_symmetry_2
 _geom_bond_publ_flag
Cr Cl 2.3429(9) . ?
Cr Cl 2.3429(9) 2_666 ?
Cr P1 2.5733(8) . ?
Cr P1 2.5733(8) 2_666 ?
N1 C3 1.517(4) . ?
N1 P1 1.647(3) . ?
N1 Al 1.889(3) . ?
P1 C18 1.833(3) . ?
P1 C12 1.840(3) . ?
Cl Al 2.3274(14) . ?
Al C1 1.950(4) . ?
Al C2 1.974(4) . ?
C3 C6 1.522(5) . ?
C3 C5 1.522(5) . ?
C3 C4 1.531(5) . ?
C7 C8 1.379(5) . ?
C7 C12 1.386(5) . ?
C8 C9 1.394(5) . ?
C9 C10 1.374(5) . ?
C10 C11 1.393(5) . ?
C11 C12 1.392(4) . ?
C13 C14 1.391(5) . ?
C13 C18 1.396(4) . ?
C14 C15 1.376(5) . ?
C15 C16 1.364(5) . ?
C16 C17 1.385(5) . ?
C17 C18 1.392(5) . ?
C19 C20 1.3900 . ?
C19 C24 1.3900 . ?
C20 C21 1.3900 . ?
C21 C22 1.3900 . ?
C22 C23 1.3900 . ?
C23 C24 1.3900 . ?
C24 C25 1.500(13) . ?
 
loop_
 _geom_angle_atom_site_label_1
 _geom_angle_atom_site_label_2
 _geom_angle_atom_site_label_3
 _geom_angle
 _geom_angle_site_symmetry_1
 _geom_angle_site_symmetry_3
 _geom_angle_publ_flag
Cl Cr Cl 180.00(3) . 2_666 ?
Cl Cr P1 88.25(3) . . ?
Cl Cr P1 91.75(3) 2_666 . ?
Cl Cr P1 91.75(3) . 2_666 ?
Cl Cr P1 88.25(3) 2_666 2_666 ?
P1 Cr P1 180.0 . 2_666 ?
C3 N1 P1 127.4(2) . . ?
C3 N1 Al 122.6(2) . . ?
P1 N1 Al 109.96(14) . . ?
N1 P1 C18 111.87(14) . . ?
N1 P1 C12 110.26(14) . . ?
C18 P1 C12 104.89(14) . . ?
N1 P1 Cr 109.59(9) . . ?
C18 P1 Cr 106.02(10) . . ?
C12 P1 Cr 114.10(10) . . ?
Al Cl Cr 90.10(4) . . ?
N1 Al C1 122.59(15) . . ?
N1 Al C2 110.17(14) . . ?
C1 Al C2 115.92(19) . . ?
N1 Al Cl 99.68(9) . . ?
C1 Al Cl 101.91(13) . . ?
C2 Al Cl 102.38(14) . . ?
N1 C3 C6 108.1(3) . . ?
N1 C3 C5 108.3(3) . . ?
C6 C3 C5 110.7(3) . . ?
N1 C3 C4 113.7(3) . . ?
C6 C3 C4 107.2(3) . . ?
C5 C3 C4 108.9(3) . . ?
C8 C7 C12 120.7(3) . . ?
C7 C8 C9 119.9(3) . . ?
C10 C9 C8 120.1(3) . . ?
C9 C10 C11 119.9(3) . . ?
C12 C11 C10 120.4(3) . . ?
C7 C12 C11 119.0(3) . . ?
C7 C12 P1 121.6(2) . . ?
C11 C12 P1 119.0(2) . . ?
C14 C13 C18 120.3(3) . . ?
C15 C14 C13 120.4(3) . . ?
C16 C15 C14 119.8(3) . . ?
C15 C16 C17 120.7(3) . . ?
C16 C17 C18 120.7(3) . . ?
C17 C18 C13 118.2(3) . . ?
C17 C18 P1 116.9(2) . . ?
C13 C18 P1 124.9(2) . . ?
C20 C19 C24 120.0 . . ?
C19 C20 C21 120.0 . . ?
C20 C21 C22 120.0 . . ?
C23 C22 C21 120.0 . . ?
C22 C23 C24 120.0 . . ?
C23 C24 C19 120.0 . . ?
C23 C24 C25 118.3(7) . . ?
C19 C24 C25 121.7(7) . . ?
 
loop_
 _geom_torsion_atom_site_label_1
 _geom_torsion_atom_site_label_2
 _geom_torsion_atom_site_label_3
 _geom_torsion_atom_site_label_4
 _geom_torsion
 _geom_torsion_site_symmetry_1
 _geom_torsion_site_symmetry_2
 _geom_torsion_site_symmetry_3
 _geom_torsion_site_symmetry_4
 _geom_torsion_publ_flag
C3 N1 P1 C18 40.9(3) . . . . ?
Al N1 P1 C18 -137.98(15) . . . . ?
C3 N1 P1 C12 -75.4(3) . . . . ?
Al N1 P1 C12 105.71(15) . . . . ?
C3 N1 P1 Cr 158.2(2) . . . . ?
Al N1 P1 Cr -20.69(16) . . . . ?
Cl Cr P1 N1 -21.61(11) . . . . ?
Cl Cr P1 N1 158.39(11) 2_666 . . . ?
P1 Cr P1 N1 -125(3) 2_666 . . . ?
Cl Cr P1 C18 99.29(11) . . . . ?
Cl Cr P1 C18 -80.71(11) 2_666 . . . ?
P1 Cr P1 C18 -4(3) 2_666 . . . ?
Cl Cr P1 C12 -145.79(12) . . . . ?
Cl Cr P1 C12 34.21(12) 2_666 . . . ?
P1 Cr P1 C12 111(3) 2_666 . . . ?
Cl Cr Cl Al 26(9) 2_666 . . . ?
P1 Cr Cl Al 42.86(4) . . . . ?
P1 Cr Cl Al -137.14(4) 2_666 . . . ?
C3 N1 Al C1 -12.2(3) . . . . ?
P1 N1 Al C1 166.73(18) . . . . ?
C3 N1 Al C2 129.7(3) . . . . ?
P1 N1 Al C2 -51.3(2) . . . . ?
C3 N1 Al Cl -123.2(2) . . . . ?
P1 N1 Al Cl 55.79(15) . . . . ?
Cr Cl Al N1 -64.20(9) . . . . ?
Cr Cl Al C1 169.34(14) . . . . ?
Cr Cl Al C2 49.10(12) . . . . ?
P1 N1 C3 C6 137.6(3) . . . . ?
Al N1 C3 C6 -43.6(3) . . . . ?
P1 N1 C3 C5 -102.4(3) . . . . ?
Al N1 C3 C5 76.4(3) . . . . ?
P1 N1 C3 C4 18.8(4) . . . . ?
Al N1 C3 C4 -162.5(2) . . . . ?
C12 C7 C8 C9 -1.4(5) . . . . ?
C7 C8 C9 C10 0.9(5) . . . . ?
C8 C9 C10 C11 -0.6(5) . . . . ?
C9 C10 C11 C12 0.8(5) . . . . ?
C8 C7 C12 C11 1.6(5) . . . . ?
C8 C7 C12 P1 175.0(2) . . . . ?
C10 C11 C12 C7 -1.3(5) . . . . ?
C10 C11 C12 P1 -174.8(2) . . . . ?
N1 P1 C12 C7 171.8(2) . . . . ?
C18 P1 C12 C7 51.2(3) . . . . ?
Cr P1 C12 C7 -64.4(3) . . . . ?
N1 P1 C12 C11 -14.8(3) . . . . ?
C18 P1 C12 C11 -135.4(2) . . . . ?
Cr P1 C12 C11 109.0(2) . . . . ?
C18 C13 C14 C15 0.2(5) . . . . ?
C13 C14 C15 C16 -0.2(5) . . . . ?
C14 C15 C16 C17 0.5(6) . . . . ?
C15 C16 C17 C18 -0.8(6) . . . . ?
C16 C17 C18 C13 0.8(5) . . . . ?
C16 C17 C18 P1 -178.0(3) . . . . ?
C14 C13 C18 C17 -0.5(5) . . . . ?
C14 C13 C18 P1 178.2(3) . . . . ?
N1 P1 C18 C17 72.0(3) . . . . ?
C12 P1 C18 C17 -168.5(2) . . . . ?
Cr P1 C18 C17 -47.4(3) . . . . ?
N1 P1 C18 C13 -106.7(3) . . . . ?
C12 P1 C18 C13 12.8(3) . . . . ?
Cr P1 C18 C13 133.9(3) . . . . ?
C24 C19 C20 C21 0.0 . . . . ?
C19 C20 C21 C22 0.0 . . . . ?
C20 C21 C22 C23 0.0 . . . . ?
C21 C22 C23 C24 0.0 . . . . ?
C22 C23 C24 C19 0.0 . . . . ?
C22 C23 C24 C25 -177.7(13) . . . . ?
C20 C19 C24 C23 0.0 . . . . ?
C20 C19 C24 C25 177.7(14) . . . . ?
 
_diffrn_measured_fraction_theta_max    0.986
_diffrn_reflns_theta_full              24.77
_diffrn_measured_fraction_theta_full   0.986
_refine_diff_density_max    0.446
_refine_diff_density_min   -0.268
_refine_diff_density_rms    0.063


                                             #=== End


 
data_complex 4
 


 

_audit_creation_method            SHELXL-97 
_chemical_name_systematic 
; 
 ? 
; 
_chemical_name_common             ? 
_chemical_melting_point           ? 
_chemical_formula_moiety          ? 
_chemical_formula_sum 
 'C47 H66 Al2 Cl2 Cr N2 P2' 
_chemical_formula_weight          897.82 
  
loop_ 
 _atom_type_symbol 
 _atom_type_description 
 _atom_type_scat_dispersion_real 
 _atom_type_scat_dispersion_imag 
 _atom_type_scat_source 
 'C'  'C'   0.0033   0.0016 
 'International Tables Vol C Tables 4.2.6.8 and 6.1.1.4' 
 'H'  'H'   0.0000   0.0000 
 'International Tables Vol C Tables 4.2.6.8 and 6.1.1.4' 
 'N'  'N'   0.0061   0.0033 
 'International Tables Vol C Tables 4.2.6.8 and 6.1.1.4' 
 'Al'  'Al'   0.0645   0.0514 
 'International Tables Vol C Tables 4.2.6.8 and 6.1.1.4' 
 'P'  'P'   0.1023   0.0942 
 'International Tables Vol C Tables 4.2.6.8 and 6.1.1.4' 
 'Cl'  'Cl'   0.1484   0.1585 
 'International Tables Vol C Tables 4.2.6.8 and 6.1.1.4' 
 'Cr'  'Cr'   0.3209   0.6236 
 'International Tables Vol C Tables 4.2.6.8 and 6.1.1.4' 
  
_symmetry_cell_setting            Triclinic 
_symmetry_space_group_name_H-M    P-1 
  
loop_ 
 _symmetry_equiv_pos_as_xyz 
 'x, y, z' 
 '-x, -y, -z' 
  
_cell_length_a                    9.8866(19) 
_cell_length_b                    11.738(2) 
_cell_length_c                    12.036(2) 
_cell_angle_alpha                 112.373(3) 
_cell_angle_beta                  102.186(3) 
_cell_angle_gamma                 100.069(3) 
_cell_volume                      1211.2(4) 
_cell_formula_units_Z             1 
_cell_measurement_temperature     200(2) 
_cell_measurement_reflns_used     5011 
_cell_measurement_theta_min       2.44 
_cell_measurement_theta_max       24.71 
  
_exptl_crystal_description        block 
_exptl_crystal_colour             blue_green 
_exptl_crystal_size_max           0.17 
_exptl_crystal_size_mid           0.14 
_exptl_crystal_size_min           0.09 
_exptl_crystal_density_meas       ? 
_exptl_crystal_density_diffrn     1.231 
_exptl_crystal_density_method     'not measured' 
_exptl_crystal_F_000              476 
_exptl_absorpt_coefficient_mu     0.482 
_exptl_absorpt_correction_type    multi-scan 
_exptl_absorpt_correction_T_min   0.9226 
_exptl_absorpt_correction_T_max   0.9579 
_exptl_absorpt_process_details    'SADABS, Bruker (2003)' 
  
_exptl_special_details 
; 
 Data collection is performed with four batch runs at phi = 0.00 deg 
 (600 frames), at phi = 90.00 deg (600 frames), at phi = 180.00 deg 
 (600 frames), and at phi = 270.00 deg (600 frames). 
 A fifth batch run is collected at phi = 0.00 deg (50 frames) to monitor 
 crystal and diffractometer stability. Frame width = 0.30 deg in omega. 
 Data is merged, corrected for decay (if any), and treated with multi-scan 
 absorption corrections (if required). All symmetry-equivalent reflections 
 are merged for centrosymmetric data. 
 Friedel pairs are not merged for noncentrosymmetric data. 
; 
  
_diffrn_ambient_temperature       200(2) 
_diffrn_radiation_wavelength      0.71073 
_diffrn_radiation_type            MoK\a 
_diffrn_radiation_source          'fine-focus sealed tube' 
_diffrn_radiation_monochromator   graphite 
_diffrn_measurement_device_type   'Bruker SMART 1K CCD' 
_diffrn_measurement_method        '\f and \w scans' 
_diffrn_detector_area_resol_mean  ? 
_diffrn_reflns_number             8659 
_diffrn_reflns_av_R_equivalents   0.0351 
_diffrn_reflns_av_sigmaI/netI     0.0470 
_diffrn_reflns_limit_h_min        -11 
_diffrn_reflns_limit_h_max        11 
_diffrn_reflns_limit_k_min        -13 
_diffrn_reflns_limit_k_max        13 
_diffrn_reflns_limit_l_min        -14 
_diffrn_reflns_limit_l_max        14 
_diffrn_reflns_theta_min          2.06 
_diffrn_reflns_theta_max          24.79 
_reflns_number_total              3918 
_reflns_number_gt                 2867 
_reflns_threshold_expression      >2sigma(I) 
  
_computing_data_collection        'SMART, Bruker (2000)' 
_computing_cell_refinement        'SMART, Bruker (2000)' 
_computing_data_reduction         'XPREP, Bruker (2009)' 
_computing_structure_solution     'SHELXS-97 (Sheldrick, 2008)' 
_computing_structure_refinement   'SHELXL-97 (Sheldrick, 2008)' 
_computing_molecular_graphics     'SHELXTL, Bruker (2004)' 
_computing_publication_material   'SHELXTL, Bruker (2004)' 
  
_refine_special_details 
; 
 Refinement of F^2^ against ALL reflections.  The weighted R-factor wR and 
 goodness of fit S are based on F^2^, conventional R-factors R are based 
 on F, with F set to zero for negative F^2^. The threshold expression of 
 F^2^ > 2sigma(F^2^) is used only for calculating R-factors(gt) etc. and is 
 not relevant to the choice of reflections for refinement.  R-factors based 
 on F^2^ are statistically about twice as large as those based on F, and R- 
 factors based on ALL data will be even larger. 
; 
  
_refine_ls_structure_factor_coef  Fsqd 
_refine_ls_matrix_type            full 
_refine_ls_weighting_scheme       calc 
_refine_ls_weighting_details 
 'calc w=1/[\s^2^(Fo^2^)+(0.1229P)^2^+1.7029P] where P=(Fo^2^+2Fc^2^)/3' 
_atom_sites_solution_primary      direct 
_atom_sites_solution_secondary    difmap 
_atom_sites_solution_hydrogens    geom 
_refine_ls_hydrogen_treatment     constr 
_refine_ls_extinction_method      none 
_refine_ls_extinction_coef        ? 
_refine_ls_number_reflns          3918 
_refine_ls_number_parameters      248 
_refine_ls_number_restraints      2 
_refine_ls_R_factor_all           0.0992 
_refine_ls_R_factor_gt            0.0761 
_refine_ls_wR_factor_ref          0.2251 
_refine_ls_wR_factor_gt           0.2000 
_refine_ls_goodness_of_fit_ref    1.017 
_refine_ls_restrained_S_all       1.017 
_refine_ls_shift/su_max           0.001 
_refine_ls_shift/su_mean          0.000 
  
loop_ 
 _atom_site_label 
 _atom_site_type_symbol 
 _atom_site_fract_x 
 _atom_site_fract_y 
 _atom_site_fract_z 
 _atom_site_U_iso_or_equiv 
 _atom_site_adp_type 
 _atom_site_occupancy 
 _atom_site_symmetry_multiplicity 
 _atom_site_calc_flag 
 _atom_site_refinement_flags 
 _atom_site_disorder_assembly 
 _atom_site_disorder_group 
Cr1 Cr 0.5000 0.5000 0.5000 0.0498(4) Uani 1 2 d S . . 
Al1 Al 0.46988(17) 0.6370(2) 0.8064(2) 0.0816(6) Uani 1 1 d . . . 
Cl1 Cl 0.3598(3) 0.6099(3) 0.6135(3) 0.0578(7) Uani 0.68 1 d P A 1 
Cl1' Cl 0.3911(7) 0.6576(7) 0.5921(6) 0.0739(18) Uani 0.32 1 d P A 2 
P1 P 0.71773(11) 0.62190(10) 0.69873(10) 0.0434(3) Uani 1 1 d . A . 
N1 N 0.6673(3) 0.6904(3) 0.8253(3) 0.0465(8) Uani 1 1 d . A . 
C1 C 0.8343(5) 0.7441(4) 0.6729(4) 0.0474(10) Uani 1 1 d . . . 
C2 C 0.7665(6) 0.8230(5) 0.6344(5) 0.0661(13) Uani 1 1 d . A . 
H2A H 0.6661 0.8113 0.6227 0.079 Uiso 1 1 calc R . . 
C3 C 0.8450(8) 0.9192(6) 0.6126(6) 0.0824(17) Uani 1 1 d . . . 
H3A H 0.7978 0.9723 0.5858 0.099 Uiso 1 1 calc R A . 
C4 C 0.9878(8) 0.9369(6) 0.6296(5) 0.0816(18) Uani 1 1 d . A . 
H4A H 1.0409 1.0029 0.6153 0.098 Uiso 1 1 calc R . . 
C5 C 1.0571(6) 0.8594(6) 0.6678(5) 0.0748(16) Uani 1 1 d . . . 
H5A H 1.1574 0.8717 0.6789 0.090 Uiso 1 1 calc R A . 
C6 C 0.9803(5) 0.7640(5) 0.6898(4) 0.0583(12) Uani 1 1 d . A . 
H6A H 1.0287 0.7116 0.7169 0.070 Uiso 1 1 calc R . . 
C7 C 0.8285(5) 0.5173(4) 0.7213(4) 0.0516(11) Uani 1 1 d . . . 
C8 C 0.9086(5) 0.4686(5) 0.6406(4) 0.0604(13) Uani 1 1 d . A . 
H8A H 0.9120 0.4947 0.5754 0.073 Uiso 1 1 calc R . . 
C9 C 0.9826(6) 0.3830(6) 0.6546(6) 0.0798(18) Uani 1 1 d . . . 
H9A H 1.0387 0.3522 0.6007 0.096 Uiso 1 1 calc R A . 
C10 C 0.9746(8) 0.3426(6) 0.7476(7) 0.090(2) Uani 1 1 d . A . 
H10A H 1.0249 0.2833 0.7572 0.108 Uiso 1 1 calc R . . 
C11 C 0.8953(7) 0.3873(6) 0.8255(6) 0.0835(18) Uani 1 1 d . . . 
H11A H 0.8905 0.3591 0.8892 0.100 Uiso 1 1 calc R A . 
C12 C 0.8210(6) 0.4741(5) 0.8123(5) 0.0628(13) Uani 1 1 d . A . 
H12A H 0.7647 0.5038 0.8663 0.075 Uiso 1 1 calc R . . 
C13 C 0.7644(5) 0.7936(4) 0.9512(4) 0.0483(10) Uani 1 1 d . . . 
C14 C 0.7170(5) 0.7687(5) 1.0536(5) 0.0629(13) Uani 1 1 d . A . 
H14A H 0.6152 0.7661 1.0415 0.094 Uiso 1 1 calc R . . 
H14B H 0.7755 0.8377 1.1363 0.094 Uiso 1 1 calc R . . 
H14C H 0.7298 0.6863 1.0491 0.094 Uiso 1 1 calc R . . 
C15 C 0.7490(7) 0.9250(5) 0.9599(5) 0.0696(14) Uani 1 1 d . A . 
H15A H 0.6473 0.9237 0.9450 0.104 Uiso 1 1 calc R . . 
H15B H 0.7844 0.9425 0.8962 0.104 Uiso 1 1 calc R . . 
H15C H 0.8056 0.9923 1.0441 0.104 Uiso 1 1 calc R . . 
C16 C 0.9241(5) 0.7990(5) 0.9753(4) 0.0642(14) Uani 1 1 d . A . 
H16A H 0.9583 0.8155 0.9106 0.096 Uiso 1 1 calc R . . 
H16B H 0.9366 0.7169 0.9719 0.096 Uiso 1 1 calc R . . 
H16C H 0.9798 0.8681 1.0587 0.096 Uiso 1 1 calc R . . 
C17 C 0.4081(10) 0.4729(11) 0.8139(10) 0.131(3) Uani 1 1 d . A . 
H17A H 0.4747 0.4755 0.8895 0.157 Uiso 1 1 calc R . . 
H17B H 0.3109 0.4632 0.8248 0.157 Uiso 1 1 calc R . . 
C18 C 0.4033(15) 0.3647(11) 0.7085(12) 0.173(5) Uani 1 1 d . . . 
H18A H 0.3726 0.2875 0.7208 0.259 Uiso 1 1 calc R A . 
H18B H 0.4994 0.3721 0.6975 0.259 Uiso 1 1 calc R . . 
H18C H 0.3347 0.3588 0.6334 0.259 Uiso 1 1 calc R . . 
C19 C 0.3688(8) 0.7695(8) 0.9039(8) 0.102(2) Uani 1 1 d . A . 
H19A H 0.4437 0.8504 0.9643 0.122 Uiso 1 1 calc R . . 
H19B H 0.3047 0.7889 0.8425 0.122 Uiso 1 1 calc R . . 
C20 C 0.2893(11) 0.7273(12) 0.9683(10) 0.141(4) Uani 1 1 d . . . 
H20A H 0.2454 0.7933 1.0109 0.212 Uiso 1 1 calc R A . 
H20B H 0.3523 0.7102 1.0312 0.212 Uiso 1 1 calc R . . 
H20C H 0.2133 0.6482 0.9091 0.212 Uiso 1 1 calc R . . 
C21 C 0.4919(11) 0.0027(9) 0.5810(7) 0.090(4) Uiso 0.50 1 d PGD B -1 
C22 C 0.4251(10) -0.1031(8) 0.4649(8) 0.075(3) Uiso 0.50 1 d PGD B -1 
H22A H 0.3625 -0.1774 0.4597 0.090 Uiso 0.50 1 calc PR B -1 
C23 C 0.4500(11) -0.1000(10) 0.3566(7) 0.101(4) Uiso 0.50 1 d PG B -1 
H23A H 0.4044 -0.1722 0.2772 0.121 Uiso 0.50 1 calc PR B -1 
C24 C 0.5417(13) 0.0089(12) 0.3642(9) 0.124(6) Uiso 0.50 1 d PG B -1 
H24A H 0.5587 0.0110 0.2902 0.149 Uiso 0.50 1 calc PR B -1 
C25 C 0.6085(11) 0.1146(10) 0.4803(11) 0.104(5) Uiso 0.50 1 d PG B -1 
H25A H 0.6712 0.1890 0.4856 0.125 Uiso 0.50 1 calc PR B -1 
C26 C 0.5836(11) 0.1115(8) 0.5887(8) 0.100(4) Uiso 0.50 1 d PGD B -1 
H26A H 0.6293 0.1838 0.6680 0.120 Uiso 0.50 1 calc PR B -1 
C27 C 0.472(2) -0.0001(16) 0.6992(15) 0.130(6) Uiso 0.50 1 d PD B -1 
H27A H 0.4060 -0.0828 0.6790 0.195 Uiso 0.50 1 calc PR B -1 
H27B H 0.4317 0.0694 0.7403 0.195 Uiso 0.50 1 calc PR B -1 
H27C H 0.5656 0.0113 0.7561 0.195 Uiso 0.50 1 calc PR B -1 
  
loop_ 
 _atom_site_aniso_label 
 _atom_site_aniso_U_11 
 _atom_site_aniso_U_22 
 _atom_site_aniso_U_33 
 _atom_site_aniso_U_23 
 _atom_site_aniso_U_13 
 _atom_site_aniso_U_12 
Cr1 0.0351(5) 0.0498(6) 0.0400(6) 0.0043(4) -0.0053(4) 0.0095(4) 
Al1 0.0345(8) 0.1002(14) 0.0962(14) 0.0405(11) 0.0087(8) 0.0040(8) 
Cl1 0.0417(12) 0.0779(18) 0.0431(11) 0.0185(11) 0.0043(8) 0.0200(11) 
Cl1' 0.050(3) 0.092(5) 0.048(3) 0.004(3) -0.007(2) 0.034(3) 
P1 0.0326(6) 0.0459(6) 0.0353(6) 0.0079(5) -0.0012(4) 0.0080(4) 
N1 0.0318(17) 0.049(2) 0.0417(19) 0.0114(16) 0.0007(15) 0.0025(15) 
C1 0.045(2) 0.056(3) 0.031(2) 0.0143(19) 0.0038(17) 0.0109(19) 
C2 0.064(3) 0.066(3) 0.059(3) 0.027(3) 0.002(2) 0.016(3) 
C3 0.095(5) 0.080(4) 0.072(4) 0.044(3) 0.009(3) 0.016(3) 
C4 0.101(5) 0.076(4) 0.049(3) 0.027(3) 0.011(3) -0.007(3) 
C5 0.058(3) 0.092(4) 0.057(3) 0.027(3) 0.014(3) -0.003(3) 
C6 0.051(3) 0.069(3) 0.045(2) 0.021(2) 0.008(2) 0.009(2) 
C7 0.043(2) 0.045(2) 0.044(2) 0.0079(19) -0.0040(19) 0.0070(19) 
C8 0.052(3) 0.066(3) 0.045(2) 0.011(2) 0.000(2) 0.024(2) 
C9 0.065(3) 0.082(4) 0.062(3) 0.004(3) -0.003(3) 0.038(3) 
C10 0.092(5) 0.066(4) 0.087(5) 0.018(3) -0.008(4) 0.041(3) 
C11 0.088(4) 0.074(4) 0.074(4) 0.035(3) -0.007(3) 0.019(3) 
C12 0.060(3) 0.053(3) 0.059(3) 0.020(2) 0.000(2) 0.009(2) 
C13 0.043(2) 0.050(2) 0.034(2) 0.0089(19) 0.0036(18) 0.0025(19) 
C14 0.052(3) 0.070(3) 0.050(3) 0.017(2) 0.010(2) 0.004(2) 
C15 0.086(4) 0.053(3) 0.050(3) 0.011(2) 0.009(3) 0.012(3) 
C16 0.042(3) 0.079(3) 0.037(2) 0.007(2) -0.0034(19) -0.003(2) 
C17 0.083(5) 0.162(9) 0.127(7) 0.052(7) 0.025(5) 0.021(5) 
C18 0.207(13) 0.134(9) 0.162(10) 0.026(8) 0.054(9) 0.103(9) 
C19 0.078(4) 0.119(6) 0.113(6) 0.061(5) 0.018(4) 0.025(4) 
C20 0.112(7) 0.183(10) 0.131(8) 0.052(7) 0.057(6) 0.057(7) 
  
_geom_special_details 
; 
 All esds (except the esd in the dihedral angle between two l.s. planes) 
 are estimated using the full covariance matrix.  The cell esds are taken 
 into account individually in the estimation of esds in distances, angles 
 and torsion angles; correlations between esds in cell parameters are only 
 used when they are defined by crystal symmetry.  An approximate (isotropic) 
 treatment of cell esds is used for estimating esds involving l.s. planes. 
; 
  
loop_ 
 _geom_bond_atom_site_label_1 
 _geom_bond_atom_site_label_2 
 _geom_bond_distance 
 _geom_bond_site_symmetry_2 
 _geom_bond_publ_flag 
Cr1 Cl1' 2.335(6) . ? 
Cr1 Cl1' 2.335(6) 2_666 ? 
Cr1 Cl1 2.353(3) . ? 
Cr1 Cl1 2.353(3) 2_666 ? 
Cr1 P1 2.5586(10) . ? 
Cr1 P1 2.5586(10) 2_666 ? 
Al1 N1 1.879(4) . ? 
Al1 C17 1.959(11) . ? 
Al1 C19 2.108(9) . ? 
Al1 Cl1 2.220(3) . ? 
Al1 Cl1' 2.648(7) . ? 
P1 N1 1.656(4) . ? 
P1 C7 1.839(5) . ? 
P1 C1 1.842(5) . ? 
N1 C13 1.506(5) . ? 
C1 C2 1.391(7) . ? 
C1 C6 1.379(7) . ? 
C2 C3 1.397(8) . ? 
C3 C4 1.349(9) . ? 
C4 C5 1.383(9) . ? 
C5 C6 1.384(8) . ? 
C7 C12 1.380(7) . ? 
C7 C8 1.399(7) . ? 
C8 C9 1.380(7) . ? 
C9 C10 1.384(10) . ? 
C10 C11 1.359(9) . ? 
C11 C12 1.392(8) . ? 
C13 C14 1.514(7) . ? 
C13 C15 1.542(7) . ? 
C13 C16 1.530(6) . ? 
C17 C18 1.396(13) . ? 
C19 C20 1.371(12) . ? 
C21 C22 1.3900 . ? 
C21 C26 1.3900 . ? 
C21 C27 1.488(15) . ? 
C22 C23 1.3900 . ? 
C23 C24 1.3900 . ? 
C24 C25 1.3900 . ? 
C25 C26 1.3900 . ? 
  
loop_ 
 _geom_angle_atom_site_label_1 
 _geom_angle_atom_site_label_2 
 _geom_angle_atom_site_label_3 
 _geom_angle 
 _geom_angle_site_symmetry_1 
 _geom_angle_site_symmetry_3 
 _geom_angle_publ_flag 
Cl1' Cr1 Cl1' 179.999(1) . 2_666 ? 
Cl1' Cr1 Cl1 18.33(17) . . ? 
Cl1' Cr1 Cl1 161.67(17) 2_666 . ? 
Cl1' Cr1 Cl1 161.67(17) . 2_666 ? 
Cl1' Cr1 Cl1 18.33(17) 2_666 2_666 ? 
Cl1 Cr1 Cl1 180.000(1) . 2_666 ? 
Cl1' Cr1 P1 87.06(15) . . ? 
Cl1' Cr1 P1 92.94(15) 2_666 . ? 
Cl1 Cr1 P1 88.55(7) . . ? 
Cl1 Cr1 P1 91.45(7) 2_666 . ? 
Cl1' Cr1 P1 92.94(15) . 2_666 ? 
Cl1' Cr1 P1 87.06(15) 2_666 2_666 ? 
Cl1 Cr1 P1 91.45(7) . 2_666 ? 
Cl1 Cr1 P1 88.55(7) 2_666 2_666 ? 
P1 Cr1 P1 180.0 . 2_666 ? 
N1 Al1 C17 114.4(3) . . ? 
N1 Al1 C19 120.0(3) . . ? 
C17 Al1 C19 110.9(4) . . ? 
N1 Al1 Cl1 104.31(16) . . ? 
C17 Al1 Cl1 107.5(3) . . ? 
C19 Al1 Cl1 97.3(2) . . ? 
N1 Al1 Cl1' 92.9(2) . . ? 
C17 Al1 Cl1' 121.1(4) . . ? 
C19 Al1 Cl1' 95.6(3) . . ? 
Cl1 Al1 Cl1' 14.50(16) . . ? 
Al1 Cl1 Cr1 100.64(12) . . ? 
Cr1 Cl1' Al1 89.7(2) . . ? 
N1 P1 C7 110.7(2) . . ? 
N1 P1 C1 110.53(19) . . ? 
C7 P1 C1 105.4(2) . . ? 
N1 P1 Cr1 111.31(12) . . ? 
C7 P1 Cr1 111.61(14) . . ? 
C1 P1 Cr1 107.07(13) . . ? 
C13 N1 P1 125.8(3) . . ? 
C13 N1 Al1 117.9(3) . . ? 
P1 N1 Al1 116.3(2) . . ? 
C2 C1 C6 118.4(5) . . ? 
C2 C1 P1 115.8(4) . . ? 
C6 C1 P1 125.8(4) . . ? 
C3 C2 C1 120.5(5) . . ? 
C2 C3 C4 120.2(6) . . ? 
C5 C4 C3 120.2(6) . . ? 
C4 C5 C6 120.0(6) . . ? 
C1 C6 C5 120.7(5) . . ? 
C12 C7 C8 118.3(5) . . ? 
C12 C7 P1 119.1(4) . . ? 
C8 C7 P1 122.2(4) . . ? 
C9 C8 C7 120.8(5) . . ? 
C10 C9 C8 119.5(6) . . ? 
C9 C10 C11 120.4(5) . . ? 
C10 C11 C12 120.3(6) . . ? 
C7 C12 C11 120.5(6) . . ? 
N1 C13 C14 108.2(4) . . ? 
N1 C13 C15 108.7(4) . . ? 
C14 C13 C15 109.8(4) . . ? 
N1 C13 C16 114.5(4) . . ? 
C14 C13 C16 107.5(4) . . ? 
C15 C13 C16 108.1(4) . . ? 
C18 C17 Al1 115.1(8) . . ? 
C20 C19 Al1 114.0(7) . . ? 
C22 C21 C26 120.0 . . ? 
C22 C21 C27 121.1(7) . . ? 
C26 C21 C27 118.8(7) . . ? 
C23 C22 C21 120.0 . . ? 
C22 C23 C24 120.0 . . ? 
C23 C24 C25 120.0 . . ? 
C26 C25 C24 120.0 . . ? 
C25 C26 C21 120.0 . . ? 
  
loop_ 
 _geom_torsion_atom_site_label_1 
 _geom_torsion_atom_site_label_2 
 _geom_torsion_atom_site_label_3 
 _geom_torsion_atom_site_label_4 
 _geom_torsion 
 _geom_torsion_site_symmetry_1 
 _geom_torsion_site_symmetry_2 
 _geom_torsion_site_symmetry_3 
 _geom_torsion_site_symmetry_4 
 _geom_torsion_publ_flag 
N1 Al1 Cl1 Cr1 44.37(18) . . . . ? 
C17 Al1 Cl1 Cr1 -77.4(3) . . . . ? 
C19 Al1 Cl1 Cr1 167.9(2) . . . . ? 
Cl1' Al1 Cl1 Cr1 83.6(8) . . . . ? 
Cl1' Cr1 Cl1 Al1 -116.2(7) . . . . ? 
Cl1' Cr1 Cl1 Al1 63.8(7) 2_666 . . . ? 
Cl1 Cr1 Cl1 Al1 -95(20) 2_666 . . . ? 
P1 Cr1 Cl1 Al1 -31.18(10) . . . . ? 
P1 Cr1 Cl1 Al1 148.82(10) 2_666 . . . ? 
Cl1' Cr1 Cl1' Al1 -141(7) 2_666 . . . ? 
Cl1 Cr1 Cl1' Al1 47.7(5) . . . . ? 
Cl1 Cr1 Cl1' Al1 -132.3(5) 2_666 . . . ? 
P1 Cr1 Cl1' Al1 -46.61(15) . . . . ? 
P1 Cr1 Cl1' Al1 133.39(15) 2_666 . . . ? 
N1 Al1 Cl1' Cr1 62.4(2) . . . . ? 
C17 Al1 Cl1' Cr1 -58.5(4) . . . . ? 
C19 Al1 Cl1' Cr1 -177.1(3) . . . . ? 
Cl1 Al1 Cl1' Cr1 -79.8(8) . . . . ? 
Cl1' Cr1 P1 N1 33.3(2) . . . . ? 
Cl1' Cr1 P1 N1 -146.7(2) 2_666 . . . ? 
Cl1 Cr1 P1 N1 15.06(16) . . . . ? 
Cl1 Cr1 P1 N1 -164.94(16) 2_666 . . . ? 
P1 Cr1 P1 N1 -131(12) 2_666 . . . ? 
Cl1' Cr1 P1 C7 157.6(3) . . . . ? 
Cl1' Cr1 P1 C7 -22.4(3) 2_666 . . . ? 
Cl1 Cr1 P1 C7 139.29(19) . . . . ? 
Cl1 Cr1 P1 C7 -40.71(19) 2_666 . . . ? 
P1 Cr1 P1 C7 -7(12) 2_666 . . . ? 
Cl1' Cr1 P1 C1 -87.6(2) . . . . ? 
Cl1' Cr1 P1 C1 92.4(2) 2_666 . . . ? 
Cl1 Cr1 P1 C1 -105.85(16) . . . . ? 
Cl1 Cr1 P1 C1 74.15(16) 2_666 . . . ? 
P1 Cr1 P1 C1 108(12) 2_666 . . . ? 
C7 P1 N1 C13 70.5(4) . . . . ? 
C1 P1 N1 C13 -45.9(4) . . . . ? 
Cr1 P1 N1 C13 -164.8(3) . . . . ? 
C7 P1 N1 Al1 -111.5(2) . . . . ? 
C1 P1 N1 Al1 132.1(2) . . . . ? 
Cr1 P1 N1 Al1 13.2(3) . . . . ? 
C17 Al1 N1 C13 -102.5(5) . . . . ? 
C19 Al1 N1 C13 33.1(4) . . . . ? 
Cl1 Al1 N1 C13 140.4(3) . . . . ? 
Cl1' Al1 N1 C13 131.3(3) . . . . ? 
C17 Al1 N1 P1 79.4(4) . . . . ? 
C19 Al1 N1 P1 -145.1(3) . . . . ? 
Cl1 Al1 N1 P1 -37.7(3) . . . . ? 
Cl1' Al1 N1 P1 -46.9(3) . . . . ? 
N1 P1 C1 C2 -69.8(4) . . . . ? 
C7 P1 C1 C2 170.5(4) . . . . ? 
Cr1 P1 C1 C2 51.6(4) . . . . ? 
N1 P1 C1 C6 109.4(4) . . . . ? 
C7 P1 C1 C6 -10.2(4) . . . . ? 
Cr1 P1 C1 C6 -129.2(4) . . . . ? 
C6 C1 C2 C3 0.4(8) . . . . ? 
P1 C1 C2 C3 179.7(4) . . . . ? 
C1 C2 C3 C4 -0.4(9) . . . . ? 
C2 C3 C4 C5 0.5(9) . . . . ? 
C3 C4 C5 C6 -0.6(9) . . . . ? 
C2 C1 C6 C5 -0.6(7) . . . . ? 
P1 C1 C6 C5 -179.8(4) . . . . ? 
C4 C5 C6 C1 0.6(8) . . . . ? 
N1 P1 C7 C12 20.1(4) . . . . ? 
C1 P1 C7 C12 139.7(4) . . . . ? 
Cr1 P1 C7 C12 -104.4(4) . . . . ? 
N1 P1 C7 C8 -166.9(4) . . . . ? 
C1 P1 C7 C8 -47.3(4) . . . . ? 
Cr1 P1 C7 C8 68.5(4) . . . . ? 
C12 C7 C8 C9 -2.4(7) . . . . ? 
P1 C7 C8 C9 -175.4(4) . . . . ? 
C7 C8 C9 C10 1.6(8) . . . . ? 
C8 C9 C10 C11 -0.4(9) . . . . ? 
C9 C10 C11 C12 0.1(9) . . . . ? 
C8 C7 C12 C11 2.0(7) . . . . ? 
P1 C7 C12 C11 175.3(4) . . . . ? 
C10 C11 C12 C7 -0.9(8) . . . . ? 
P1 N1 C13 C14 -142.3(4) . . . . ? 
Al1 N1 C13 C14 39.7(5) . . . . ? 
P1 N1 C13 C15 98.4(4) . . . . ? 
Al1 N1 C13 C15 -79.5(4) . . . . ? 
P1 N1 C13 C16 -22.5(6) . . . . ? 
Al1 N1 C13 C16 159.5(3) . . . . ? 
N1 Al1 C17 C18 -72.3(9) . . . . ? 
C19 Al1 C17 C18 148.2(8) . . . . ? 
Cl1 Al1 C17 C18 43.0(9) . . . . ? 
Cl1' Al1 C17 C18 37.5(10) . . . . ? 
N1 Al1 C19 C20 -130.2(7) . . . . ? 
C17 Al1 C19 C20 6.7(8) . . . . ? 
Cl1 Al1 C19 C20 118.6(7) . . . . ? 
Cl1' Al1 C19 C20 133.1(7) . . . . ? 
C26 C21 C22 C23 0.0 . . . . ? 
C27 C21 C22 C23 -177.4(14) . . . . ? 
C21 C22 C23 C24 0.0 . . . . ? 
C22 C23 C24 C25 0.0 . . . . ? 
C23 C24 C25 C26 0.0 . . . . ? 
C24 C25 C26 C21 0.0 . . . . ? 
C22 C21 C26 C25 0.0 . . . . ? 
C27 C21 C26 C25 177.4(13) . . . . ? 
  
_diffrn_measured_fraction_theta_max    0.940 
_diffrn_reflns_theta_full              24.79 
_diffrn_measured_fraction_theta_full   0.940 
_refine_diff_density_max    1.170 
_refine_diff_density_min   -0.550 
_refine_diff_density_rms    0.081 


                                           #===End


Data Complex 5

 

_audit_creation_method            SHELXL-97 
_chemical_name_systematic 
; 
 ? 
; 
_chemical_name_common             ? 
_chemical_melting_point           ? 
_chemical_formula_moiety          ? 
_chemical_formula_sum 
 'C103 H122 Cl2 Cr4 N6 P6' 
_chemical_formula_weight          1908.79 
  
loop_ 
 _atom_type_symbol 
 _atom_type_description 
 _atom_type_scat_dispersion_real 
 _atom_type_scat_dispersion_imag 
 _atom_type_scat_source 
 'C'  'C'   0.0033   0.0016 
 'International Tables Vol C Tables 4.2.6.8 and 6.1.1.4' 
 'H'  'H'   0.0000   0.0000 
 'International Tables Vol C Tables 4.2.6.8 and 6.1.1.4' 
 'N'  'N'   0.0061   0.0033 
 'International Tables Vol C Tables 4.2.6.8 and 6.1.1.4' 
 'P'  'P'   0.1023   0.0942 
 'International Tables Vol C Tables 4.2.6.8 and 6.1.1.4' 
 'Cr'  'Cr'   0.3209   0.6236 
 'International Tables Vol C Tables 4.2.6.8 and 6.1.1.4' 
 'Cl'  'Cl'   0.1484   0.1585 
 'International Tables Vol C Tables 4.2.6.8 and 6.1.1.4' 
  
_symmetry_cell_setting            Triclinic 
_symmetry_space_group_name_H-M    P-1 
  
loop_ 
 _symmetry_equiv_pos_as_xyz 
 'x, y, z' 
 '-x, -y, -z' 
  
_cell_length_a                    11.752(5) 
_cell_length_b                    12.928(6) 
_cell_length_c                    18.525(8) 
_cell_angle_alpha                 85.416(7) 
_cell_angle_beta                  79.728(7) 
_cell_angle_gamma                 70.844(7) 
_cell_volume                      2615(2) 
_cell_formula_units_Z             1 
_cell_measurement_temperature     203(2) 
_cell_measurement_reflns_used     5336 
_cell_measurement_theta_min       2.32 
_cell_measurement_theta_max       24.99 
  
_exptl_crystal_description        block 
_exptl_crystal_colour             green 
_exptl_crystal_size_max           0.20 
_exptl_crystal_size_mid           0.13 
_exptl_crystal_size_min           0.11 
_exptl_crystal_density_meas       ? 
_exptl_crystal_density_diffrn     1.212 
_exptl_crystal_density_method     'not measured' 
_exptl_crystal_F_000              1002 
_exptl_absorpt_coefficient_mu     0.593 
_exptl_absorpt_correction_type    multi-scan 
_exptl_absorpt_correction_T_min   0.8906 
_exptl_absorpt_correction_T_max   0.9376 
_exptl_absorpt_process_details    'SADABS, Bruker (2003)' 
  
_exptl_special_details 
; 
 Data collection is performed with four batch runs at phi = 0.00 deg 
 (600 frames), at phi = 90.00 deg (600 frames), at phi = 180.00 deg 
 (600 frames), and at phi = 270.00 deg (600 frames). 
 A fifth batch run is collected at phi = 0.00 deg (50 frames) to monitor 
 crystal and diffractometer stability. Frame width = 0.30 deg in omega. 
 Data is merged, corrected for decay (if any), and treated with multi-scan 
 absorption corrections (if required). All symmetry-equivalent reflections 
 are merged for centrosymmetric data. 
 Friedel pairs are not merged for noncentrosymmetric data. 
; 
  
_diffrn_ambient_temperature       203(2) 
_diffrn_radiation_wavelength      0.71073 
_diffrn_radiation_type            MoK\a 
_diffrn_radiation_source          'fine-focus sealed tube' 
_diffrn_radiation_monochromator   graphite 
_diffrn_measurement_device_type   'Bruker SMART 1K CCD' 
_diffrn_measurement_method        '\f and \w scans' 
_diffrn_detector_area_resol_mean  ? 
_diffrn_reflns_number             25453 
_diffrn_reflns_av_R_equivalents   0.0374 
_diffrn_reflns_av_sigmaI/netI     0.0471 
_diffrn_reflns_limit_h_min        -13 
_diffrn_reflns_limit_h_max        14 
_diffrn_reflns_limit_k_min        -15 
_diffrn_reflns_limit_k_max        15 
_diffrn_reflns_limit_l_min        -22 
_diffrn_reflns_limit_l_max        22 
_diffrn_reflns_theta_min          1.86 
_diffrn_reflns_theta_max          25.05 
_reflns_number_total              8963 
_reflns_number_gt                 6717 
_reflns_threshold_expression      >2sigma(I) 
  
_computing_data_collection        'SMART, Bruker (2000)' 
_computing_cell_refinement        'SMART, Bruker (2000)' 
_computing_data_reduction         'XPREP, Bruker (2009)' 
_computing_structure_solution     'SHELXS-97 (Sheldrick, 2008)' 
_computing_structure_refinement   'SHELXL-97 (Sheldrick, 2008)' 
_computing_molecular_graphics     'SHELXTL, Bruker (2004)' 
_computing_publication_material   'SHELXTL, Bruker (2004)' 
  
_refine_special_details 
; 
 Refinement of F^2^ against ALL reflections.  The weighted R-factor wR and 
 goodness of fit S are based on F^2^, conventional R-factors R are based 
 on F, with F set to zero for negative F^2^. The threshold expression of 
 F^2^ > 2sigma(F^2^) is used only for calculating R-factors(gt) etc. and is 
 not relevant to the choice of reflections for refinement.  R-factors based 
 on F^2^ are statistically about twice as large as those based on F, and R- 
 factors based on ALL data will be even larger. 
; 
  
_refine_ls_structure_factor_coef  Fsqd 
_refine_ls_matrix_type            full 
_refine_ls_weighting_scheme       calc 
_refine_ls_weighting_details 
 'calc w=1/[\s^2^(Fo^2^)+(0.0852P)^2^+3.6652P] where P=(Fo^2^+2Fc^2^)/3' 
_atom_sites_solution_primary      direct 
_atom_sites_solution_secondary    difmap 
_atom_sites_solution_hydrogens    geom 
_refine_ls_hydrogen_treatment     constr 
_refine_ls_extinction_method      none 
_refine_ls_extinction_coef        ? 
_refine_ls_number_reflns          8963 
_refine_ls_number_parameters      530 
_refine_ls_number_restraints      0 
_refine_ls_R_factor_all           0.0780 
_refine_ls_R_factor_gt            0.0555 
_refine_ls_wR_factor_ref          0.1635 
_refine_ls_wR_factor_gt           0.1490 
_refine_ls_goodness_of_fit_ref    1.041 
_refine_ls_restrained_S_all       1.041 
_refine_ls_shift/su_max           0.001 
_refine_ls_shift/su_mean          0.000 
  
loop_ 
 _atom_site_label 
 _atom_site_type_symbol 
 _atom_site_fract_x 
 _atom_site_fract_y 
 _atom_site_fract_z 
 _atom_site_U_iso_or_equiv 
 _atom_site_adp_type 
 _atom_site_occupancy 
 _atom_site_symmetry_multiplicity 
 _atom_site_calc_flag 
 _atom_site_refinement_flags 
 _atom_site_disorder_assembly 
 _atom_site_disorder_group 
Cr1 Cr 0.49028(5) 0.58300(5) 0.29876(3) 0.02438(17) Uani 1 1 d . . . 
Cr2 Cr 0.61742(5) 0.52984(5) 0.41588(3) 0.02667(18) Uani 1 1 d . . . 
Cl1 Cl 0.39350(9) 0.55864(9) 0.44758(6) 0.0356(3) Uani 1 1 d . . . 
N1 N 0.3541(3) 0.5562(3) 0.25834(18) 0.0297(7) Uani 1 1 d . . . 
N2 N 0.6278(3) 0.6832(3) 0.40478(17) 0.0275(7) Uani 1 1 d . . . 
N3 N 0.7549(3) 0.4253(3) 0.34977(18) 0.0295(7) Uani 1 1 d . . . 
P1 P 0.33026(9) 0.68487(8) 0.23365(6) 0.0282(2) Uani 1 1 d . . . 
P2 P 0.56576(9) 0.72710(8) 0.33114(6) 0.0258(2) Uani 1 1 d . . . 
P3 P 0.68654(9) 0.43003(8) 0.27849(6) 0.0263(2) Uani 1 1 d . . . 
C1 C 0.3381(4) 0.7112(3) 0.1343(2) 0.0323(9) Uani 1 1 d . . . 
C2 C 0.2391(4) 0.7394(4) 0.0972(3) 0.0450(11) Uani 1 1 d . . . 
H2A H 0.1590 0.7532 0.1241 0.054 Uiso 1 1 calc R . . 
C3 C 0.2564(5) 0.7477(4) 0.0198(3) 0.0560(14) Uani 1 1 d . . . 
H3A H 0.1884 0.7648 -0.0052 0.067 Uiso 1 1 calc R . . 
C4 C 0.3710(5) 0.7312(5) -0.0190(3) 0.0589(14) Uani 1 1 d . . . 
H4A H 0.3820 0.7388 -0.0710 0.071 Uiso 1 1 calc R . . 
C5 C 0.4709(5) 0.7036(4) 0.0165(3) 0.0546(13) Uani 1 1 d . . . 
H5A H 0.5503 0.6916 -0.0111 0.066 Uiso 1 1 calc R . . 
C6 C 0.4556(4) 0.6934(4) 0.0928(3) 0.0423(11) Uani 1 1 d . . . 
H6A H 0.5247 0.6743 0.1171 0.051 Uiso 1 1 calc R . . 
C7 C 0.1826(4) 0.7785(3) 0.2753(2) 0.0333(9) Uani 1 1 d . . . 
C8 C 0.1383(4) 0.8866(4) 0.2478(3) 0.0431(11) Uani 1 1 d . . . 
H8A H 0.1803 0.9096 0.2041 0.052 Uiso 1 1 calc R . . 
C9 C 0.0328(5) 0.9595(4) 0.2851(3) 0.0542(14) Uani 1 1 d . . . 
H9A H 0.0029 1.0323 0.2664 0.065 Uiso 1 1 calc R . . 
C10 C -0.0288(4) 0.9278(4) 0.3488(3) 0.0560(14) Uani 1 1 d . . . 
H10A H -0.1016 0.9782 0.3731 0.067 Uiso 1 1 calc R . . 
C11 C 0.0152(4) 0.8224(5) 0.3774(3) 0.0522(13) Uani 1 1 d . . . 
H11A H -0.0267 0.8008 0.4217 0.063 Uiso 1 1 calc R . . 
C12 C 0.1215(4) 0.7479(4) 0.3408(3) 0.0414(11) Uani 1 1 d . . . 
H12A H 0.1522 0.6760 0.3607 0.050 Uiso 1 1 calc R . . 
C13 C 0.3045(4) 0.4715(4) 0.2392(2) 0.0365(10) Uani 1 1 d . . . 
C14 C 0.1760(4) 0.5233(4) 0.2197(3) 0.0558(14) Uani 1 1 d . . . 
H14A H 0.1209 0.5630 0.2620 0.084 Uiso 1 1 calc R . . 
H14B H 0.1463 0.4656 0.2070 0.084 Uiso 1 1 calc R . . 
H14C H 0.1786 0.5742 0.1778 0.084 Uiso 1 1 calc R . . 
C15 C 0.3905(5) 0.4076(5) 0.1735(3) 0.0634(16) Uani 1 1 d . . . 
H15A H 0.4722 0.3734 0.1863 0.095 Uiso 1 1 calc R . . 
H15B H 0.3946 0.4579 0.1314 0.095 Uiso 1 1 calc R . . 
H15C H 0.3595 0.3508 0.1609 0.095 Uiso 1 1 calc R . . 
C16 C 0.2977(5) 0.3962(4) 0.3053(3) 0.0574(14) Uani 1 1 d . . . 
H16A H 0.2421 0.4382 0.3465 0.086 Uiso 1 1 calc R . . 
H16B H 0.3792 0.3631 0.3187 0.086 Uiso 1 1 calc R . . 
H16C H 0.2674 0.3384 0.2936 0.086 Uiso 1 1 calc R . . 
C17 C 0.4362(3) 0.8562(3) 0.3485(2) 0.0303(9) Uani 1 1 d . . . 
C18 C 0.3369(4) 0.8516(4) 0.4024(2) 0.0385(10) Uani 1 1 d . . . 
H18A H 0.3373 0.7837 0.4262 0.046 Uiso 1 1 calc R . . 
C19 C 0.2384(4) 0.9452(4) 0.4213(3) 0.0450(11) Uani 1 1 d . . . 
H19A H 0.1724 0.9408 0.4580 0.054 Uiso 1 1 calc R . . 
C20 C 0.2359(4) 1.0445(4) 0.3870(3) 0.0509(13) Uani 1 1 d . . . 
H20A H 0.1683 1.1083 0.3998 0.061 Uiso 1 1 calc R . . 
C21 C 0.3324(5) 1.0506(4) 0.3338(3) 0.0532(13) Uani 1 1 d . . . 
H21A H 0.3311 1.1190 0.3103 0.064 Uiso 1 1 calc R . . 
C22 C 0.4313(4) 0.9575(3) 0.3146(3) 0.0424(11) Uani 1 1 d . . . 
H22A H 0.4966 0.9629 0.2777 0.051 Uiso 1 1 calc R . . 
C23 C 0.6737(4) 0.7660(3) 0.2574(2) 0.0284(8) Uani 1 1 d . . . 
C24 C 0.6398(4) 0.8040(3) 0.1888(2) 0.0362(10) Uani 1 1 d . . . 
H24A H 0.5598 0.8122 0.1806 0.043 Uiso 1 1 calc R . . 
C25 C 0.7230(5) 0.8298(4) 0.1327(3) 0.0459(11) Uani 1 1 d . . . 
H25A H 0.6994 0.8552 0.0864 0.055 Uiso 1 1 calc R . . 
C26 C 0.8388(4) 0.8187(4) 0.1441(3) 0.0449(11) Uani 1 1 d . . . 
H26A H 0.8942 0.8382 0.1059 0.054 Uiso 1 1 calc R . . 
C27 C 0.8753(4) 0.7793(4) 0.2109(3) 0.0429(11) Uani 1 1 d . . . 
H27A H 0.9557 0.7711 0.2184 0.051 Uiso 1 1 calc R . . 
C28 C 0.7932(4) 0.7519(3) 0.2670(2) 0.0327(9) Uani 1 1 d . . . 
H28A H 0.8188 0.7232 0.3124 0.039 Uiso 1 1 calc R . . 
C29 C 0.6530(4) 0.7468(3) 0.4611(2) 0.0323(9) Uani 1 1 d . . . 
C30 C 0.6563(4) 0.8627(4) 0.4346(2) 0.0400(10) Uani 1 1 d . . . 
H30A H 0.5777 0.9058 0.4203 0.060 Uiso 1 1 calc R . . 
H30B H 0.7214 0.8565 0.3923 0.060 Uiso 1 1 calc R . . 
H30C H 0.6720 0.8991 0.4744 0.060 Uiso 1 1 calc R . . 
C31 C 0.5550(5) 0.7585(4) 0.5288(2) 0.0470(12) Uani 1 1 d . . . 
H31A H 0.4751 0.8007 0.5157 0.070 Uiso 1 1 calc R . . 
H31B H 0.5730 0.7967 0.5668 0.070 Uiso 1 1 calc R . . 
H31C H 0.5537 0.6857 0.5474 0.070 Uiso 1 1 calc R . . 
C32 C 0.7774(5) 0.6798(4) 0.4836(3) 0.0478(12) Uani 1 1 d . . . 
H32A H 0.7761 0.6063 0.5003 0.072 Uiso 1 1 calc R . . 
H32B H 0.7925 0.7165 0.5235 0.072 Uiso 1 1 calc R . . 
H32C H 0.8424 0.6743 0.4414 0.072 Uiso 1 1 calc R . . 
C33 C 0.7626(3) 0.4708(3) 0.1899(2) 0.0302(9) Uani 1 1 d . . . 
C34 C 0.8582(4) 0.5143(3) 0.1835(2) 0.0355(10) Uani 1 1 d . . . 
H34A H 0.8911 0.5194 0.2259 0.043 Uiso 1 1 calc R . . 
C35 C 0.9054(4) 0.5501(4) 0.1159(3) 0.0462(12) Uani 1 1 d . . . 
H35A H 0.9717 0.5780 0.1122 0.055 Uiso 1 1 calc R . . 
C36 C 0.8571(5) 0.5459(4) 0.0534(3) 0.0491(13) Uani 1 1 d . . . 
H36A H 0.8897 0.5712 0.0074 0.059 Uiso 1 1 calc R . . 
C37 C 0.7608(5) 0.5044(4) 0.0588(3) 0.0481(12) Uani 1 1 d . . . 
H37A H 0.7277 0.5003 0.0164 0.058 Uiso 1 1 calc R . . 
C38 C 0.7131(4) 0.4689(4) 0.1270(2) 0.0385(10) Uani 1 1 d . . . 
H38A H 0.6454 0.4429 0.1308 0.046 Uiso 1 1 calc R . . 
C39 C 0.6934(3) 0.2899(3) 0.2586(2) 0.0315(9) Uani 1 1 d . . . 
C40 C 0.7593(4) 0.2296(4) 0.1970(2) 0.0390(10) Uani 1 1 d . . . 
H40A H 0.8039 0.2619 0.1593 0.047 Uiso 1 1 calc R . . 
C41 C 0.7610(5) 0.1224(4) 0.1896(3) 0.0472(12) Uani 1 1 d . . . 
H41A H 0.8058 0.0830 0.1469 0.057 Uiso 1 1 calc R . . 
C42 C 0.6987(4) 0.0738(4) 0.2436(3) 0.0497(13) Uani 1 1 d . . . 
H42A H 0.7001 0.0009 0.2382 0.060 Uiso 1 1 calc R . . 
C43 C 0.6344(5) 0.1302(4) 0.3052(3) 0.0613(15) Uani 1 1 d . . . 
H43A H 0.5922 0.0962 0.3431 0.074 Uiso 1 1 calc R . . 
C44 C 0.6310(4) 0.2381(4) 0.3125(3) 0.0484(12) Uani 1 1 d . . . 
H44A H 0.5850 0.2769 0.3552 0.058 Uiso 1 1 calc R . . 
C45 C 0.8744(4) 0.3458(4) 0.3665(2) 0.0379(10) Uani 1 1 d . . . 
C46 C 0.9309(5) 0.4077(5) 0.4082(4) 0.079(2) Uani 1 1 d . . . 
H46A H 0.8733 0.4393 0.4521 0.119 Uiso 1 1 calc R . . 
H46B H 0.9495 0.4665 0.3767 0.119 Uiso 1 1 calc R . . 
H46C H 1.0062 0.3573 0.4228 0.119 Uiso 1 1 calc R . . 
C47 C 0.8513(5) 0.2503(5) 0.4142(3) 0.0688(18) Uani 1 1 d . . . 
H47A H 0.7929 0.2788 0.4584 0.103 Uiso 1 1 calc R . . 
H47B H 0.9283 0.2023 0.4282 0.103 Uiso 1 1 calc R . . 
H47C H 0.8179 0.2087 0.3865 0.103 Uiso 1 1 calc R . . 
C48 C 0.9657(4) 0.2976(4) 0.2978(3) 0.0482(12) Uani 1 1 d . . . 
H48A H 0.9813 0.3572 0.2658 0.072 Uiso 1 1 calc R . . 
H48B H 0.9316 0.2551 0.2714 0.072 Uiso 1 1 calc R . . 
H48C H 1.0423 0.2499 0.3124 0.072 Uiso 1 1 calc R . . 
C49 C 0.6994(5) 0.8993(5) 0.9020(4) 0.057(3) Uiso 0.50 1 d PG . . 
C50 C 0.7279(5) 0.9782(4) 0.9353(4) 0.043(2) Uiso 0.50 1 d PG . . 
H50A H 0.6678 1.0472 0.9467 0.052 Uiso 0.50 1 calc PR . . 
C51 C 0.8445(6) 0.9561(5) 0.9519(4) 0.076(3) Uiso 0.50 1 d PG . . 
H51A H 0.8640 1.0100 0.9747 0.091 Uiso 0.50 1 calc PR . . 
C52 C 0.9324(5) 0.8552(6) 0.9353(4) 0.058(3) Uiso 0.50 1 d PG . . 
H52A H 1.0121 0.8401 0.9467 0.070 Uiso 0.50 1 calc PR . . 
C53 C 0.9039(5) 0.7763(5) 0.9020(4) 0.067(3) Uiso 0.50 1 d PG . . 
H53A H 0.9640 0.7073 0.8906 0.080 Uiso 0.50 1 calc PR . . 
C54 C 0.7873(6) 0.7984(5) 0.8853(4) 0.055(3) Uiso 0.50 1 d PG . . 
H54A H 0.7678 0.7444 0.8626 0.066 Uiso 0.50 1 calc PR . . 
C55 C 0.5807(14) 0.9228(13) 0.8849(9) 0.096(4) Uiso 0.50 1 d P . . 
H55A H 0.5301 0.9960 0.9020 0.143 Uiso 0.50 1 calc PR . . 
H55B H 0.5442 0.8684 0.9093 0.143 Uiso 0.50 1 calc PR . . 
H55C H 0.5855 0.9202 0.8317 0.143 Uiso 0.50 1 calc PR . . 
  
loop_ 
 _atom_site_aniso_label 
 _atom_site_aniso_U_11 
 _atom_site_aniso_U_22 
 _atom_site_aniso_U_33 
 _atom_site_aniso_U_23 
 _atom_site_aniso_U_13 
 _atom_site_aniso_U_12 
Cr1 0.0220(3) 0.0223(3) 0.0299(3) 0.0003(3) -0.0071(2) -0.0072(3) 
Cr2 0.0252(3) 0.0236(3) 0.0297(3) 0.0010(3) -0.0012(3) -0.0078(3) 
Cl1 0.0271(5) 0.0427(6) 0.0358(5) 0.0096(4) -0.0062(4) -0.0111(4) 
N1 0.0258(17) 0.0301(18) 0.0366(19) 0.0020(15) -0.0101(14) -0.0113(14) 
N2 0.0310(17) 0.0267(17) 0.0275(17) 0.0008(14) -0.0054(14) -0.0128(14) 
N3 0.0241(16) 0.0271(18) 0.0336(18) -0.0026(14) -0.0047(14) -0.0030(14) 
P1 0.0250(5) 0.0289(6) 0.0314(6) 0.0009(4) -0.0089(4) -0.0076(4) 
P2 0.0263(5) 0.0236(5) 0.0290(5) 0.0014(4) -0.0057(4) -0.0097(4) 
P3 0.0229(5) 0.0238(5) 0.0303(5) -0.0003(4) -0.0023(4) -0.0059(4) 
C1 0.034(2) 0.028(2) 0.036(2) -0.0015(17) -0.0102(18) -0.0080(18) 
C2 0.042(3) 0.048(3) 0.044(3) 0.001(2) -0.018(2) -0.008(2) 
C3 0.061(3) 0.062(3) 0.043(3) -0.003(2) -0.026(3) -0.007(3) 
C4 0.077(4) 0.063(4) 0.030(3) -0.004(2) -0.014(3) -0.011(3) 
C5 0.058(3) 0.058(3) 0.038(3) -0.005(2) -0.002(2) -0.008(3) 
C6 0.038(2) 0.044(3) 0.042(3) 0.001(2) -0.008(2) -0.009(2) 
C7 0.026(2) 0.035(2) 0.039(2) -0.0049(19) -0.0077(18) -0.0082(18) 
C8 0.042(3) 0.036(2) 0.052(3) -0.002(2) -0.016(2) -0.009(2) 
C9 0.045(3) 0.031(3) 0.082(4) -0.012(3) -0.018(3) 0.000(2) 
C10 0.031(2) 0.053(3) 0.077(4) -0.024(3) -0.004(3) -0.002(2) 
C11 0.033(2) 0.068(4) 0.058(3) -0.015(3) 0.003(2) -0.022(2) 
C12 0.034(2) 0.042(3) 0.047(3) -0.005(2) -0.007(2) -0.009(2) 
C13 0.036(2) 0.036(2) 0.043(2) -0.0030(19) -0.0099(19) -0.0170(19) 
C14 0.045(3) 0.049(3) 0.086(4) 0.001(3) -0.026(3) -0.025(2) 
C15 0.060(3) 0.070(4) 0.073(4) -0.034(3) 0.001(3) -0.037(3) 
C16 0.067(3) 0.050(3) 0.070(4) 0.016(3) -0.026(3) -0.035(3) 
C17 0.027(2) 0.027(2) 0.039(2) -0.0042(17) -0.0085(17) -0.0087(17) 
C18 0.038(2) 0.035(2) 0.044(3) -0.002(2) -0.006(2) -0.013(2) 
C19 0.033(2) 0.043(3) 0.054(3) -0.009(2) -0.004(2) -0.006(2) 
C20 0.039(3) 0.038(3) 0.067(3) -0.012(2) -0.014(2) 0.005(2) 
C21 0.057(3) 0.029(2) 0.067(3) 0.004(2) -0.018(3) -0.002(2) 
C22 0.044(3) 0.027(2) 0.052(3) 0.002(2) -0.004(2) -0.009(2) 
C23 0.031(2) 0.022(2) 0.031(2) -0.0011(16) -0.0037(17) -0.0077(16) 
C24 0.042(2) 0.034(2) 0.035(2) 0.0005(18) -0.0067(19) -0.0149(19) 
C25 0.063(3) 0.043(3) 0.030(2) 0.002(2) -0.003(2) -0.018(2) 
C26 0.051(3) 0.044(3) 0.037(3) -0.003(2) 0.011(2) -0.022(2) 
C27 0.034(2) 0.045(3) 0.050(3) -0.009(2) 0.003(2) -0.016(2) 
C28 0.034(2) 0.034(2) 0.030(2) -0.0019(18) -0.0039(17) -0.0101(18) 
C29 0.038(2) 0.030(2) 0.033(2) -0.0048(17) -0.0083(18) -0.0147(18) 
C30 0.049(3) 0.036(2) 0.041(3) -0.004(2) -0.008(2) -0.021(2) 
C31 0.061(3) 0.051(3) 0.034(2) -0.007(2) 0.001(2) -0.028(3) 
C32 0.055(3) 0.046(3) 0.050(3) -0.001(2) -0.026(2) -0.018(2) 
C33 0.028(2) 0.0204(19) 0.038(2) -0.0017(17) -0.0017(17) -0.0035(16) 
C34 0.033(2) 0.028(2) 0.043(2) -0.0018(19) -0.0018(19) -0.0093(18) 
C35 0.037(2) 0.035(3) 0.063(3) 0.000(2) 0.006(2) -0.013(2) 
C36 0.054(3) 0.041(3) 0.039(3) 0.007(2) 0.013(2) -0.009(2) 
C37 0.052(3) 0.046(3) 0.038(3) 0.001(2) -0.005(2) -0.005(2) 
C38 0.040(2) 0.038(2) 0.038(2) 0.0033(19) -0.0070(19) -0.014(2) 
C39 0.024(2) 0.028(2) 0.040(2) 0.0005(18) -0.0045(17) -0.0057(17) 
C40 0.045(3) 0.035(2) 0.036(2) -0.0016(19) -0.003(2) -0.014(2) 
C41 0.055(3) 0.037(3) 0.046(3) -0.014(2) 0.001(2) -0.012(2) 
C42 0.046(3) 0.028(2) 0.073(4) -0.009(2) 0.004(2) -0.014(2) 
C43 0.069(4) 0.036(3) 0.073(4) -0.005(3) 0.018(3) -0.024(3) 
C44 0.052(3) 0.035(3) 0.051(3) -0.005(2) 0.016(2) -0.016(2) 
C45 0.025(2) 0.038(2) 0.043(3) 0.002(2) -0.0095(18) 0.0024(18) 
C46 0.046(3) 0.084(4) 0.102(5) -0.040(4) -0.043(3) 0.011(3) 
C47 0.043(3) 0.067(4) 0.066(4) 0.034(3) 0.002(3) 0.008(3) 
C48 0.029(2) 0.052(3) 0.050(3) 0.005(2) -0.004(2) 0.002(2) 
  
_geom_special_details 
; 
 All esds (except the esd in the dihedral angle between two l.s. planes) 
 are estimated using the full covariance matrix.  The cell esds are taken 
 into account individually in the estimation of esds in distances, angles 
 and torsion angles; correlations between esds in cell parameters are only 
 used when they are defined by crystal symmetry.  An approximate (isotropic) 
 treatment of cell esds is used for estimating esds involving l.s. planes. 
; 
  
loop_ 
 _geom_bond_atom_site_label_1 
 _geom_bond_atom_site_label_2 
 _geom_bond_distance 
 _geom_bond_site_symmetry_2 
 _geom_bond_publ_flag 
Cr1 N1 2.018(3) . ? 
Cr1 P1 2.3781(14) . ? 
Cr1 P2 2.4638(14) . ? 
Cr1 P3 2.4875(14) . ? 
Cr1 Cr2 2.7669(13) . ? 
Cr2 N2 2.017(3) . ? 
Cr2 N3 2.015(3) . ? 
Cr2 Cl1 2.4997(16) . ? 
Cr2 Cl1 2.6911(16) 2_666 ? 
Cr2 P3 2.8110(16) . ? 
Cr2 P2 2.8320(15) . ? 
Cl1 Cr2 2.6911(16) 2_666 ? 
N1 C13 1.490(5) . ? 
N1 P1 1.635(3) . ? 
N2 C29 1.503(5) . ? 
N2 P2 1.635(3) . ? 
N3 C45 1.511(5) . ? 
N3 P3 1.651(3) . ? 
P1 C7 1.834(4) . ? 
P1 C1 1.836(4) . ? 
P2 C23 1.849(4) . ? 
P2 C17 1.858(4) . ? 
P3 C33 1.848(4) . ? 
P3 C39 1.851(4) . ? 
C1 C2 1.388(6) . ? 
C1 C6 1.411(6) . ? 
C2 C3 1.412(7) . ? 
C3 C4 1.367(8) . ? 
C4 C5 1.379(8) . ? 
C5 C6 1.394(7) . ? 
C7 C8 1.410(6) . ? 
C7 C12 1.393(6) . ? 
C8 C9 1.391(7) . ? 
C9 C10 1.377(8) . ? 
C10 C11 1.388(8) . ? 
C11 C12 1.400(7) . ? 
C13 C16 1.509(7) . ? 
C13 C15 1.535(7) . ? 
C13 C14 1.534(6) . ? 
C17 C22 1.394(6) . ? 
C17 C18 1.408(6) . ? 
C18 C19 1.389(6) . ? 
C19 C20 1.381(7) . ? 
C20 C21 1.382(7) . ? 
C21 C22 1.389(7) . ? 
C23 C28 1.397(6) . ? 
C23 C24 1.402(6) . ? 
C24 C25 1.394(6) . ? 
C25 C26 1.373(7) . ? 
C26 C27 1.386(7) . ? 
C27 C28 1.395(6) . ? 
C29 C31 1.525(6) . ? 
C29 C32 1.546(6) . ? 
C29 C30 1.549(6) . ? 
C33 C34 1.396(6) . ? 
C33 C38 1.397(6) . ? 
C34 C35 1.387(6) . ? 
C35 C36 1.387(7) . ? 
C36 C37 1.389(7) . ? 
C37 C38 1.394(6) . ? 
C39 C44 1.392(6) . ? 
C39 C40 1.393(6) . ? 
C40 C41 1.396(6) . ? 
C41 C42 1.367(7) . ? 
C42 C43 1.368(7) . ? 
C43 C44 1.398(7) . ? 
C45 C46 1.519(7) . ? 
C45 C47 1.528(7) . ? 
C45 C48 1.536(6) . ? 
C49 C55 1.415(16) . ? 
C49 C50 1.3900 . ? 
C49 C54 1.3900 . ? 
C50 C51 1.3900 . ? 
C51 C52 1.3900 . ? 
C52 C53 1.3900 . ? 
C53 C54 1.3900 . ? 
  
loop_ 
 _geom_angle_atom_site_label_1 
 _geom_angle_atom_site_label_2 
 _geom_angle_atom_site_label_3 
 _geom_angle 
 _geom_angle_site_symmetry_1 
 _geom_angle_site_symmetry_3 
 _geom_angle_publ_flag 
N1 Cr1 P1 42.69(10) . . ? 
N1 Cr1 P2 143.76(10) . . ? 
P1 Cr1 P2 101.95(5) . . ? 
N1 Cr1 P3 113.73(10) . . ? 
P1 Cr1 P3 139.39(5) . . ? 
P2 Cr1 P3 99.32(5) . . ? 
N1 Cr1 Cr2 142.39(10) . . ? 
P1 Cr1 Cr2 156.11(4) . . ? 
P2 Cr1 Cr2 65.26(4) . . ? 
P3 Cr1 Cr2 64.43(4) . . ? 
N2 Cr2 N3 111.52(13) . . ? 
N2 Cr2 Cl1 103.80(10) . . ? 
N3 Cr2 Cl1 133.45(10) . . ? 
N2 Cr2 Cl1 116.86(10) . 2_666 ? 
N3 Cr2 Cl1 108.42(10) . 2_666 ? 
Cl1 Cr2 Cl1 79.81(4) . 2_666 ? 
N2 Cr2 Cr1 86.56(9) . . ? 
N3 Cr2 Cr1 87.84(10) . . ? 
Cl1 Cr2 Cr1 64.60(4) . . ? 
Cl1 Cr2 Cr1 141.63(4) 2_666 . ? 
N2 Cr2 P3 109.85(10) . . ? 
N3 Cr2 P3 35.38(10) . . ? 
Cl1 Cr2 P3 104.47(4) . . ? 
Cl1 Cr2 P3 130.58(5) 2_666 . ? 
Cr1 Cr2 P3 52.96(4) . . ? 
N2 Cr2 P2 34.50(9) . . ? 
N3 Cr2 P2 102.99(10) . . ? 
Cl1 Cr2 P2 89.23(4) . . ? 
Cl1 Cr2 P2 145.34(4) 2_666 . ? 
Cr1 Cr2 P2 52.20(3) . . ? 
P3 Cr2 P2 83.95(5) . . ? 
Cr2 Cl1 Cr2 100.19(4) . 2_666 ? 
C13 N1 P1 132.8(3) . . ? 
C13 N1 Cr1 145.3(3) . . ? 
P1 N1 Cr1 80.48(14) . . ? 
C29 N2 P2 129.5(3) . . ? 
C29 N2 Cr2 127.4(2) . . ? 
P2 N2 Cr2 101.16(16) . . ? 
C45 N3 P3 128.9(3) . . ? 
C45 N3 Cr2 130.1(3) . . ? 
P3 N3 Cr2 99.65(16) . . ? 
N1 P1 C7 114.61(19) . . ? 
N1 P1 C1 114.16(18) . . ? 
C7 P1 C1 105.53(19) . . ? 
N1 P1 Cr1 56.83(11) . . ? 
C7 P1 Cr1 125.07(14) . . ? 
C1 P1 Cr1 128.12(14) . . ? 
N2 P2 C23 111.19(17) . . ? 
N2 P2 C17 111.20(18) . . ? 
C23 P2 C17 103.69(18) . . ? 
N2 P2 Cr1 106.68(12) . . ? 
C23 P2 Cr1 114.72(13) . . ? 
C17 P2 Cr1 109.42(13) . . ? 
N2 P2 Cr2 44.34(11) . . ? 
C23 P2 Cr2 125.88(13) . . ? 
C17 P2 Cr2 129.10(14) . . ? 
Cr1 P2 Cr2 62.54(4) . . ? 
N3 P3 C33 115.65(18) . . ? 
N3 P3 C39 109.39(18) . . ? 
C33 P3 C39 101.03(18) . . ? 
N3 P3 Cr1 106.87(12) . . ? 
C33 P3 Cr1 102.10(13) . . ? 
C39 P3 Cr1 121.99(13) . . ? 
N3 P3 Cr2 44.97(11) . . ? 
C33 P3 Cr2 130.92(13) . . ? 
C39 P3 Cr2 127.15(14) . . ? 
Cr1 P3 Cr2 62.61(3) . . ? 
C2 C1 C6 118.3(4) . . ? 
C2 C1 P1 125.0(3) . . ? 
C6 C1 P1 116.5(3) . . ? 
C1 C2 C3 120.5(5) . . ? 
C4 C3 C2 120.0(5) . . ? 
C3 C4 C5 120.6(5) . . ? 
C4 C5 C6 120.1(5) . . ? 
C5 C6 C1 120.4(4) . . ? 
C8 C7 C12 119.1(4) . . ? 
C8 C7 P1 120.7(3) . . ? 
C12 C7 P1 119.6(3) . . ? 
C9 C8 C7 119.6(5) . . ? 
C10 C9 C8 121.0(5) . . ? 
C9 C10 C11 120.1(5) . . ? 
C10 C11 C12 119.8(5) . . ? 
C11 C12 C7 120.5(5) . . ? 
N1 C13 C16 107.9(4) . . ? 
N1 C13 C15 108.7(3) . . ? 
C16 C13 C15 110.6(4) . . ? 
N1 C13 C14 111.4(4) . . ? 
C16 C13 C14 108.6(4) . . ? 
C15 C13 C14 109.5(4) . . ? 
C22 C17 C18 117.6(4) . . ? 
C22 C17 P2 125.5(3) . . ? 
C18 C17 P2 116.9(3) . . ? 
C19 C18 C17 120.9(4) . . ? 
C20 C19 C18 120.3(4) . . ? 
C19 C20 C21 119.6(4) . . ? 
C22 C21 C20 120.4(5) . . ? 
C17 C22 C21 121.1(4) . . ? 
C28 C23 C24 118.4(4) . . ? 
C28 C23 P2 120.9(3) . . ? 
C24 C23 P2 120.6(3) . . ? 
C25 C24 C23 120.3(4) . . ? 
C26 C25 C24 120.4(4) . . ? 
C25 C26 C27 120.4(4) . . ? 
C26 C27 C28 119.6(4) . . ? 
C23 C28 C27 120.9(4) . . ? 
N2 C29 C31 108.9(3) . . ? 
N2 C29 C32 107.9(3) . . ? 
C31 C29 C32 108.1(4) . . ? 
N2 C29 C30 114.4(3) . . ? 
C31 C29 C30 108.4(4) . . ? 
C32 C29 C30 109.0(3) . . ? 
C34 C33 C38 118.1(4) . . ? 
C34 C33 P3 123.6(3) . . ? 
C38 C33 P3 118.0(3) . . ? 
C35 C34 C33 120.5(4) . . ? 
C34 C35 C36 120.9(4) . . ? 
C37 C36 C35 119.5(4) . . ? 
C36 C37 C38 119.5(5) . . ? 
C37 C38 C33 121.5(4) . . ? 
C44 C39 C40 117.0(4) . . ? 
C44 C39 P3 116.3(3) . . ? 
C40 C39 P3 126.5(3) . . ? 
C41 C40 C39 121.1(4) . . ? 
C42 C41 C40 120.4(4) . . ? 
C41 C42 C43 119.9(4) . . ? 
C42 C43 C44 119.9(5) . . ? 
C39 C44 C43 121.5(4) . . ? 
C46 C45 N3 107.2(4) . . ? 
C46 C45 C47 109.6(5) . . ? 
N3 C45 C47 109.9(4) . . ? 
C46 C45 C48 108.7(4) . . ? 
N3 C45 C48 113.7(4) . . ? 
C47 C45 C48 107.7(4) . . ? 
C55 C49 C50 119.6(8) . . ? 
C55 C49 C54 120.4(8) . . ? 
C50 C49 C54 120.0 . . ? 
C51 C50 C49 120.0 . . ? 
C52 C51 C50 120.0 . . ? 
C51 C52 C53 120.0 . . ? 
C54 C53 C52 120.0 . . ? 
C53 C54 C49 120.0 . . ? 
  
loop_ 
 _geom_torsion_atom_site_label_1 
 _geom_torsion_atom_site_label_2 
 _geom_torsion_atom_site_label_3 
 _geom_torsion_atom_site_label_4 
 _geom_torsion 
 _geom_torsion_site_symmetry_1 
 _geom_torsion_site_symmetry_2 
 _geom_torsion_site_symmetry_3 
 _geom_torsion_site_symmetry_4 
 _geom_torsion_publ_flag 
N1 Cr1 Cr2 N2 -145.56(18) . . . . ? 
P1 Cr1 Cr2 N2 -58.05(13) . . . . ? 
P2 Cr1 Cr2 N2 3.42(9) . . . . ? 
P3 Cr1 Cr2 N2 118.13(10) . . . . ? 
N1 Cr1 Cr2 N3 102.73(19) . . . . ? 
P1 Cr1 Cr2 N3 -169.76(13) . . . . ? 
P2 Cr1 Cr2 N3 -108.30(10) . . . . ? 
P3 Cr1 Cr2 N3 6.42(10) . . . . ? 
N1 Cr1 Cr2 Cl1 -38.51(16) . . . . ? 
P1 Cr1 Cr2 Cl1 48.99(10) . . . . ? 
P2 Cr1 Cr2 Cl1 110.46(4) . . . . ? 
P3 Cr1 Cr2 Cl1 -134.82(5) . . . . ? 
N1 Cr1 Cr2 Cl1 -14.77(18) . . . 2_666 ? 
P1 Cr1 Cr2 Cl1 72.74(11) . . . 2_666 ? 
P2 Cr1 Cr2 Cl1 134.21(6) . . . 2_666 ? 
P3 Cr1 Cr2 Cl1 -111.08(7) . . . 2_666 ? 
N1 Cr1 Cr2 P3 96.31(17) . . . . ? 
P1 Cr1 Cr2 P3 -176.18(10) . . . . ? 
P2 Cr1 Cr2 P3 -114.72(5) . . . . ? 
N1 Cr1 Cr2 P2 -148.97(17) . . . . ? 
P1 Cr1 Cr2 P2 -61.46(9) . . . . ? 
P3 Cr1 Cr2 P2 114.72(5) . . . . ? 
N2 Cr2 Cl1 Cr2 -115.38(10) . . . 2_666 ? 
N3 Cr2 Cl1 Cr2 105.78(14) . . . 2_666 ? 
Cl1 Cr2 Cl1 Cr2 0.0 2_666 . . 2_666 ? 
Cr1 Cr2 Cl1 Cr2 165.29(5) . . . 2_666 ? 
P3 Cr2 Cl1 Cr2 129.50(5) . . . 2_666 ? 
P2 Cr2 Cl1 Cr2 -146.95(4) . . . 2_666 ? 
P1 Cr1 N1 C13 165.7(6) . . . . ? 
P2 Cr1 N1 C13 -178.5(4) . . . . ? 
P3 Cr1 N1 C13 27.4(5) . . . . ? 
Cr2 Cr1 N1 C13 -50.9(5) . . . . ? 
P2 Cr1 N1 P1 15.7(2) . . . . ? 
P3 Cr1 N1 P1 -138.29(9) . . . . ? 
Cr2 Cr1 N1 P1 143.37(10) . . . . ? 
N3 Cr2 N2 C29 -113.4(3) . . . . ? 
Cl1 Cr2 N2 C29 97.5(3) . . . . ? 
Cl1 Cr2 N2 C29 12.1(3) 2_666 . . . ? 
Cr1 Cr2 N2 C29 160.3(3) . . . . ? 
P3 Cr2 N2 C29 -151.2(3) . . . . ? 
P2 Cr2 N2 C29 165.1(4) . . . . ? 
N3 Cr2 N2 P2 81.54(18) . . . . ? 
Cl1 Cr2 N2 P2 -67.56(15) . . . . ? 
Cl1 Cr2 N2 P2 -152.98(10) 2_666 . . . ? 
Cr1 Cr2 N2 P2 -4.77(13) . . . . ? 
P3 Cr2 N2 P2 43.68(16) . . . . ? 
N2 Cr2 N3 C45 98.4(3) . . . . ? 
Cl1 Cr2 N3 C45 -125.0(3) . . . . ? 
Cl1 Cr2 N3 C45 -31.6(4) 2_666 . . . ? 
Cr1 Cr2 N3 C45 -176.1(3) . . . . ? 
P3 Cr2 N3 C45 -167.3(4) . . . . ? 
P2 Cr2 N3 C45 133.5(3) . . . . ? 
N2 Cr2 N3 P3 -94.31(17) . . . . ? 
Cl1 Cr2 N3 P3 42.3(2) . . . . ? 
Cl1 Cr2 N3 P3 135.66(12) 2_666 . . . ? 
Cr1 Cr2 N3 P3 -8.87(13) . . . . ? 
P2 Cr2 N3 P3 -59.22(15) . . . . ? 
C13 N1 P1 C7 73.9(4) . . . . ? 
Cr1 N1 P1 C7 -117.11(17) . . . . ? 
C13 N1 P1 C1 -48.0(4) . . . . ? 
Cr1 N1 P1 C1 121.01(17) . . . . ? 
C13 N1 P1 Cr1 -169.0(4) . . . . ? 
P2 Cr1 P1 N1 -170.57(15) . . . . ? 
P3 Cr1 P1 N1 69.36(16) . . . . ? 
Cr2 Cr1 P1 N1 -115.93(16) . . . . ? 
N1 Cr1 P1 C7 98.6(2) . . . . ? 
P2 Cr1 P1 C7 -72.00(17) . . . . ? 
P3 Cr1 P1 C7 167.93(17) . . . . ? 
Cr2 Cr1 P1 C7 -17.4(2) . . . . ? 
N1 Cr1 P1 C1 -96.2(2) . . . . ? 
P2 Cr1 P1 C1 93.19(17) . . . . ? 
P3 Cr1 P1 C1 -26.87(19) . . . . ? 
Cr2 Cr1 P1 C1 147.83(17) . . . . ? 
C29 N2 P2 C23 75.2(4) . . . . ? 
Cr2 N2 P2 C23 -120.17(16) . . . . ? 
C29 N2 P2 C17 -39.8(4) . . . . ? 
Cr2 N2 P2 C17 124.82(17) . . . . ? 
C29 N2 P2 Cr1 -159.1(3) . . . . ? 
Cr2 N2 P2 Cr1 5.58(15) . . . . ? 
C29 N2 P2 Cr2 -164.7(4) . . . . ? 
N1 Cr1 P2 N2 143.5(2) . . . . ? 
P1 Cr1 P2 N2 154.28(13) . . . . ? 
P3 Cr1 P2 N2 -60.53(13) . . . . ? 
Cr2 Cr1 P2 N2 -4.39(12) . . . . ? 
N1 Cr1 P2 C23 -92.9(2) . . . . ? 
P1 Cr1 P2 C23 -82.12(15) . . . . ? 
P3 Cr1 P2 C23 63.06(14) . . . . ? 
Cr2 Cr1 P2 C23 119.20(14) . . . . ? 
N1 Cr1 P2 C17 23.1(2) . . . . ? 
P1 Cr1 P2 C17 33.90(15) . . . . ? 
P3 Cr1 P2 C17 179.08(14) . . . . ? 
Cr2 Cr1 P2 C17 -124.78(15) . . . . ? 
N1 Cr1 P2 Cr2 147.85(17) . . . . ? 
P1 Cr1 P2 Cr2 158.68(4) . . . . ? 
P3 Cr1 P2 Cr2 -56.14(4) . . . . ? 
N3 Cr2 P2 N2 -109.20(19) . . . . ? 
Cl1 Cr2 P2 N2 116.15(17) . . . . ? 
Cl1 Cr2 P2 N2 45.45(18) 2_666 . . . ? 
Cr1 Cr2 P2 N2 173.97(17) . . . . ? 
P3 Cr2 P2 N2 -139.21(16) . . . . ? 
N2 Cr2 P2 C23 84.2(2) . . . . ? 
N3 Cr2 P2 C23 -25.05(19) . . . . ? 
Cl1 Cr2 P2 C23 -159.70(16) . . . . ? 
Cl1 Cr2 P2 C23 129.60(16) 2_666 . . . ? 
Cr1 Cr2 P2 C23 -101.87(16) . . . . ? 
P3 Cr2 P2 C23 -55.06(16) . . . . ? 
N2 Cr2 P2 C17 -80.5(2) . . . . ? 
N3 Cr2 P2 C17 170.30(18) . . . . ? 
Cl1 Cr2 P2 C17 35.65(16) . . . . ? 
Cl1 Cr2 P2 C17 -35.05(18) 2_666 . . . ? 
Cr1 Cr2 P2 C17 93.47(17) . . . . ? 
P3 Cr2 P2 C17 140.29(16) . . . . ? 
N2 Cr2 P2 Cr1 -173.97(16) . . . . ? 
N3 Cr2 P2 Cr1 76.83(10) . . . . ? 
Cl1 Cr2 P2 Cr1 -57.82(4) . . . . ? 
Cl1 Cr2 P2 Cr1 -128.52(7) 2_666 . . . ? 
P3 Cr2 P2 Cr1 46.82(4) . . . . ? 
C45 N3 P3 C33 -69.3(4) . . . . ? 
Cr2 N3 P3 C33 123.19(17) . . . . ? 
C45 N3 P3 C39 43.9(4) . . . . ? 
Cr2 N3 P3 C39 -123.60(17) . . . . ? 
C45 N3 P3 Cr1 177.8(3) . . . . ? 
Cr2 N3 P3 Cr1 10.32(15) . . . . ? 
C45 N3 P3 Cr2 167.5(4) . . . . ? 
N1 Cr1 P3 N3 -146.69(16) . . . . ? 
P1 Cr1 P3 N3 169.43(13) . . . . ? 
P2 Cr1 P3 N3 48.53(13) . . . . ? 
Cr2 Cr1 P3 N3 -8.20(12) . . . . ? 
N1 Cr1 P3 C33 91.45(17) . . . . ? 
P1 Cr1 P3 C33 47.58(15) . . . . ? 
P2 Cr1 P3 C33 -73.33(14) . . . . ? 
Cr2 Cr1 P3 C33 -130.05(14) . . . . ? 
N1 Cr1 P3 C39 -19.9(2) . . . . ? 
P1 Cr1 P3 C39 -63.80(18) . . . . ? 
P2 Cr1 P3 C39 175.29(16) . . . . ? 
Cr2 Cr1 P3 C39 118.57(16) . . . . ? 
N1 Cr1 P3 Cr2 -138.50(11) . . . . ? 
P1 Cr1 P3 Cr2 177.63(6) . . . . ? 
P2 Cr1 P3 Cr2 56.72(3) . . . . ? 
N2 Cr2 P3 N3 99.50(19) . . . . ? 
Cl1 Cr2 P3 N3 -149.70(17) . . . . ? 
Cl1 Cr2 P3 N3 -60.82(17) 2_666 . . . ? 
Cr1 Cr2 P3 N3 168.87(17) . . . . ? 
P2 Cr2 P3 N3 122.67(17) . . . . ? 
N2 Cr2 P3 C33 12.8(2) . . . . ? 
N3 Cr2 P3 C33 -86.7(2) . . . . ? 
Cl1 Cr2 P3 C33 123.57(17) . . . . ? 
Cl1 Cr2 P3 C33 -147.55(17) 2_666 . . . ? 
Cr1 Cr2 P3 C33 82.14(17) . . . . ? 
P2 Cr2 P3 C33 35.94(17) . . . . ? 
N2 Cr2 P3 C39 179.78(18) . . . . ? 
N3 Cr2 P3 C39 80.3(2) . . . . ? 
Cl1 Cr2 P3 C39 -69.43(16) . . . . ? 
Cl1 Cr2 P3 C39 19.45(17) 2_666 . . . ? 
Cr1 Cr2 P3 C39 -110.86(16) . . . . ? 
P2 Cr2 P3 C39 -157.06(16) . . . . ? 
N2 Cr2 P3 Cr1 -69.37(10) . . . . ? 
N3 Cr2 P3 Cr1 -168.87(17) . . . . ? 
Cl1 Cr2 P3 Cr1 41.43(4) . . . . ? 
Cl1 Cr2 P3 Cr1 130.31(5) 2_666 . . . ? 
P2 Cr2 P3 Cr1 -46.20(3) . . . . ? 
N1 P1 C1 C2 92.4(4) . . . . ? 
C7 P1 C1 C2 -34.4(4) . . . . ? 
Cr1 P1 C1 C2 158.2(3) . . . . ? 
N1 P1 C1 C6 -82.9(4) . . . . ? 
C7 P1 C1 C6 150.4(3) . . . . ? 
Cr1 P1 C1 C6 -17.1(4) . . . . ? 
C6 C1 C2 C3 1.3(7) . . . . ? 
P1 C1 C2 C3 -173.9(4) . . . . ? 
C1 C2 C3 C4 -2.0(8) . . . . ? 
C2 C3 C4 C5 1.7(9) . . . . ? 
C3 C4 C5 C6 -0.6(9) . . . . ? 
C4 C5 C6 C1 -0.1(8) . . . . ? 
C2 C1 C6 C5 -0.3(7) . . . . ? 
P1 C1 C6 C5 175.3(4) . . . . ? 
N1 P1 C7 C8 -166.3(3) . . . . ? 
C1 P1 C7 C8 -39.8(4) . . . . ? 
Cr1 P1 C7 C8 128.1(3) . . . . ? 
N1 P1 C7 C12 22.6(4) . . . . ? 
C1 P1 C7 C12 149.1(3) . . . . ? 
Cr1 P1 C7 C12 -42.9(4) . . . . ? 
C12 C7 C8 C9 -1.9(6) . . . . ? 
P1 C7 C8 C9 -173.1(4) . . . . ? 
C7 C8 C9 C10 0.3(7) . . . . ? 
C8 C9 C10 C11 1.2(8) . . . . ? 
C9 C10 C11 C12 -0.9(8) . . . . ? 
C10 C11 C12 C7 -0.8(7) . . . . ? 
C8 C7 C12 C11 2.2(6) . . . . ? 
P1 C7 C12 C11 173.4(3) . . . . ? 
P1 N1 C13 C16 -147.4(4) . . . . ? 
Cr1 N1 C13 C16 51.9(6) . . . . ? 
P1 N1 C13 C15 92.5(5) . . . . ? 
Cr1 N1 C13 C15 -68.1(6) . . . . ? 
P1 N1 C13 C14 -28.3(6) . . . . ? 
Cr1 N1 C13 C14 171.1(4) . . . . ? 
N2 P2 C17 C22 116.2(4) . . . . ? 
C23 P2 C17 C22 -3.3(4) . . . . ? 
Cr1 P2 C17 C22 -126.2(4) . . . . ? 
Cr2 P2 C17 C22 163.9(3) . . . . ? 
N2 P2 C17 C18 -61.3(4) . . . . ? 
C23 P2 C17 C18 179.2(3) . . . . ? 
Cr1 P2 C17 C18 56.3(3) . . . . ? 
Cr2 P2 C17 C18 -13.6(4) . . . . ? 
C22 C17 C18 C19 -0.5(6) . . . . ? 
P2 C17 C18 C19 177.2(3) . . . . ? 
C17 C18 C19 C20 0.4(7) . . . . ? 
C18 C19 C20 C21 -0.3(7) . . . . ? 
C19 C20 C21 C22 0.3(8) . . . . ? 
C18 C17 C22 C21 0.6(7) . . . . ? 
P2 C17 C22 C21 -176.9(4) . . . . ? 
C20 C21 C22 C17 -0.5(8) . . . . ? 
N2 P2 C23 C28 2.8(4) . . . . ? 
C17 P2 C23 C28 122.4(3) . . . . ? 
Cr1 P2 C23 C28 -118.4(3) . . . . ? 
Cr2 P2 C23 C28 -45.4(4) . . . . ? 
N2 P2 C23 C24 178.8(3) . . . . ? 
C17 P2 C23 C24 -61.6(4) . . . . ? 
Cr1 P2 C23 C24 57.6(3) . . . . ? 
Cr2 P2 C23 C24 130.6(3) . . . . ? 
C28 C23 C24 C25 -1.8(6) . . . . ? 
P2 C23 C24 C25 -177.9(3) . . . . ? 
C23 C24 C25 C26 -0.3(7) . . . . ? 
C24 C25 C26 C27 1.5(7) . . . . ? 
C25 C26 C27 C28 -0.6(7) . . . . ? 
C24 C23 C28 C27 2.7(6) . . . . ? 
P2 C23 C28 C27 178.8(3) . . . . ? 
C26 C27 C28 C23 -1.5(6) . . . . ? 
P2 N2 C29 C31 101.6(4) . . . . ? 
Cr2 N2 C29 C31 -59.3(4) . . . . ? 
P2 N2 C29 C32 -141.3(3) . . . . ? 
Cr2 N2 C29 C32 57.8(4) . . . . ? 
P2 N2 C29 C30 -19.8(5) . . . . ? 
Cr2 N2 C29 C30 179.3(3) . . . . ? 
N3 P3 C33 C34 -11.4(4) . . . . ? 
C39 P3 C33 C34 -129.4(3) . . . . ? 
Cr1 P3 C33 C34 104.2(3) . . . . ? 
Cr2 P3 C33 C34 40.1(4) . . . . ? 
N3 P3 C33 C38 175.8(3) . . . . ? 
C39 P3 C33 C38 57.8(3) . . . . ? 
Cr1 P3 C33 C38 -68.6(3) . . . . ? 
Cr2 P3 C33 C38 -132.7(3) . . . . ? 
C38 C33 C34 C35 -2.7(6) . . . . ? 
P3 C33 C34 C35 -175.5(3) . . . . ? 
C33 C34 C35 C36 1.5(7) . . . . ? 
C34 C35 C36 C37 -0.5(7) . . . . ? 
C35 C36 C37 C38 0.8(7) . . . . ? 
C36 C37 C38 C33 -2.1(7) . . . . ? 
C34 C33 C38 C37 3.1(6) . . . . ? 
P3 C33 C38 C37 176.3(3) . . . . ? 
N3 P3 C39 C44 64.3(4) . . . . ? 
C33 P3 C39 C44 -173.2(4) . . . . ? 
Cr1 P3 C39 C44 -61.3(4) . . . . ? 
Cr2 P3 C39 C44 16.7(4) . . . . ? 
N3 P3 C39 C40 -112.3(4) . . . . ? 
C33 P3 C39 C40 10.1(4) . . . . ? 
Cr1 P3 C39 C40 122.1(4) . . . . ? 
Cr2 P3 C39 C40 -159.9(3) . . . . ? 
C44 C39 C40 C41 0.8(7) . . . . ? 
P3 C39 C40 C41 177.4(4) . . . . ? 
C39 C40 C41 C42 -0.8(7) . . . . ? 
C40 C41 C42 C43 -0.1(8) . . . . ? 
C41 C42 C43 C44 1.0(9) . . . . ? 
C40 C39 C44 C43 0.1(7) . . . . ? 
P3 C39 C44 C43 -176.8(4) . . . . ? 
C42 C43 C44 C39 -1.0(9) . . . . ? 
P3 N3 C45 C46 148.1(4) . . . . ? 
Cr2 N3 C45 C46 -48.1(5) . . . . ? 
P3 N3 C45 C47 -92.9(5) . . . . ? 
Cr2 N3 C45 C47 70.9(5) . . . . ? 
P3 N3 C45 C48 28.0(5) . . . . ? 
Cr2 N3 C45 C48 -168.2(3) . . . . ? 
C55 C49 C50 C51 -179.7(10) . . . . ? 
C54 C49 C50 C51 0.0 . . . . ? 
C49 C50 C51 C52 0.0 . . . . ? 
C50 C51 C52 C53 0.0 . . . . ? 
C51 C52 C53 C54 0.0 . . . . ? 
C52 C53 C54 C49 0.0 . . . . ? 
C55 C49 C54 C53 179.7(10) . . . . ? 
C50 C49 C54 C53 0.0 . . . . ? 
  
_diffrn_measured_fraction_theta_max    0.970 
_diffrn_reflns_theta_full              25.05 
_diffrn_measured_fraction_theta_full   0.970 
_refine_diff_density_max    1.063 
_refine_diff_density_min   -0.335 
_refine_diff_density_rms    0.087 

							#===END

Data complex 6


_audit_creation_method            SHELXL-97 
_chemical_name_systematic 
; 
 ? 
; 
_chemical_name_common             ? 
_chemical_melting_point           ? 
_chemical_formula_moiety          ? 
_chemical_formula_sum 
 'C81.30 H103.20 Al2 Cl2 Cr2 N4 P4' 
_chemical_formula_weight          1489.22 
  
loop_ 
 _atom_type_symbol 
 _atom_type_description 
 _atom_type_scat_dispersion_real 
 _atom_type_scat_dispersion_imag 
 _atom_type_scat_source 
 'C'  'C'   0.0033   0.0016 
 'International Tables Vol C Tables 4.2.6.8 and 6.1.1.4' 
 'H'  'H'   0.0000   0.0000 
 'International Tables Vol C Tables 4.2.6.8 and 6.1.1.4' 
 'N'  'N'   0.0061   0.0033 
 'International Tables Vol C Tables 4.2.6.8 and 6.1.1.4' 
 'Al'  'Al'   0.0645   0.0514 
 'International Tables Vol C Tables 4.2.6.8 and 6.1.1.4' 
 'P'  'P'   0.1023   0.0942 
 'International Tables Vol C Tables 4.2.6.8 and 6.1.1.4' 
 'Cl'  'Cl'   0.1484   0.1585 
 'International Tables Vol C Tables 4.2.6.8 and 6.1.1.4' 
 'Cr'  'Cr'   0.3209   0.6236 
 'International Tables Vol C Tables 4.2.6.8 and 6.1.1.4' 
  
_symmetry_cell_setting            Triclinic 
_symmetry_space_group_name_H-M    P-1 
  
loop_ 
 _symmetry_equiv_pos_as_xyz 
 'x, y, z' 
 '-x, -y, -z' 
  
_cell_length_a                    12.6373(16) 
_cell_length_b                    13.0520(17) 
_cell_length_c                    14.8046(19) 
_cell_angle_alpha                 107.041(2) 
_cell_angle_beta                  106.809(2) 
_cell_angle_gamma                 102.044(2) 
_cell_volume                      2117.0(5) 
_cell_formula_units_Z             1 
_cell_measurement_temperature     203(2) 
_cell_measurement_reflns_used     5388 
_cell_measurement_theta_min       2.53 
_cell_measurement_theta_max       24.68 
  
_exptl_crystal_description        block 
_exptl_crystal_colour             green 
_exptl_crystal_size_max           0.20 
_exptl_crystal_size_mid           0.10 
_exptl_crystal_size_min           0.05 
_exptl_crystal_density_meas       ? 
_exptl_crystal_density_diffrn     1.168 
_exptl_crystal_density_method     'not measured' 
_exptl_crystal_F_000              787 
_exptl_absorpt_coefficient_mu     0.458 
_exptl_absorpt_correction_type    multi-scan 
_exptl_absorpt_correction_T_min   0.9140 
_exptl_absorpt_correction_T_max   0.9775 
_exptl_absorpt_process_details    'SADABS, Bruker (2003)' 
  
_exptl_special_details 
; 
 Data collection is performed with four batch runs at phi = 0.00 deg 
 (600 frames), at phi = 90.00 deg (600 frames), at phi = 180.00 deg 
 (600 frames), and at phi = 270.00 deg (600 frames). 
 A fifth batch run is collected at phi = 0.00 deg (50 frames) to monitor 
 crystal and diffractometer stability. Frame width = 0.30 deg in omega. 
 Data is merged, corrected for decay (if any), and treated with multi-scan 
 absorption corrections (if required). All symmetry-equivalent reflections 
 are merged for centrosymmetric data. 
 Friedel pairs are not merged for noncentrosymmetric data. 
; 
  
_diffrn_ambient_temperature       203(2) 
_diffrn_radiation_wavelength      0.71073 
_diffrn_radiation_type            MoK\a 
_diffrn_radiation_source          'fine-focus sealed tube' 
_diffrn_radiation_monochromator   graphite 
_diffrn_measurement_device_type   'CCD area detector' 
_diffrn_measurement_method        'phi and omega scans' 
_diffrn_detector_area_resol_mean  ? 
_diffrn_reflns_number             20203 
_diffrn_reflns_av_R_equivalents   0.1127 
_diffrn_reflns_av_sigmaI/netI     0.1544 
_diffrn_reflns_limit_h_min        -14 
_diffrn_reflns_limit_h_max        14 
_diffrn_reflns_limit_k_min        -15 
_diffrn_reflns_limit_k_max        15 
_diffrn_reflns_limit_l_min        -17 
_diffrn_reflns_limit_l_max        17 
_diffrn_reflns_theta_min          1.87 
_diffrn_reflns_theta_max          24.82 
_reflns_number_total              6977 
_reflns_number_gt                 3472 
_reflns_threshold_expression      >2sigma(I) 
  
_computing_data_collection        'APEX II, Bruker (2009)' 
_computing_cell_refinement        'APEX II, Bruker (2009)' 
_computing_data_reduction         'XPREP, Bruker (2009)' 
_computing_structure_solution     'SHELXS-97 (Sheldrick, 2008)' 
_computing_structure_refinement   'SHELXL-97 (Sheldrick, 2008)' 
_computing_molecular_graphics     'SHELXTL, Bruker (2004)' 
_computing_publication_material   'SHELXTL, Bruker (2004)' 
  
_refine_special_details 
; 
 Refinement of F^2^ against ALL reflections.  The weighted R-factor wR and 
 goodness of fit S are based on F^2^, conventional R-factors R are based 
 on F, with F set to zero for negative F^2^. The threshold expression of 
 F^2^ > 2sigma(F^2^) is used only for calculating R-factors(gt) etc. and is 
 not relevant to the choice of reflections for refinement.  R-factors based 
 on F^2^ are statistically about twice as large as those based on F, and R- 
 factors based on ALL data will be even larger. 
; 
  
_refine_ls_structure_factor_coef  Fsqd 
_refine_ls_matrix_type            full 
_refine_ls_weighting_scheme       calc 
_refine_ls_weighting_details 
 'calc w=1/[\s^2^(Fo^2^)+(0.0887P)^2^]' 
_atom_sites_solution_primary      direct 
_atom_sites_solution_secondary    difmap 
_atom_sites_solution_hydrogens    geom 
_refine_ls_hydrogen_treatment     constr 
_refine_ls_extinction_method      none 
_refine_ls_extinction_coef        ? 
_refine_ls_number_reflns          6977 
_refine_ls_number_parameters      412 
_refine_ls_number_restraints      5 
_refine_ls_R_factor_all           0.1722 
_refine_ls_R_factor_gt            0.0761 
_refine_ls_wR_factor_ref          0.1964 
_refine_ls_wR_factor_gt           0.1598 
_refine_ls_goodness_of_fit_ref    1.008 
_refine_ls_restrained_S_all       1.009 
_refine_ls_shift/su_max           0.004 
_refine_ls_shift/su_mean          0.001 
  
loop_ 
 _atom_site_label 
 _atom_site_type_symbol 
 _atom_site_fract_x 
 _atom_site_fract_y 
 _atom_site_fract_z 
 _atom_site_U_iso_or_equiv 
 _atom_site_adp_type 
 _atom_site_occupancy 
 _atom_site_symmetry_multiplicity 
 _atom_site_calc_flag 
 _atom_site_refinement_flags 
 _atom_site_disorder_assembly 
 _atom_site_disorder_group 
Cr1 Cr 0.36773(8) 0.97660(7) 0.40610(7) 0.0356(3) Uani 1 1 d . . . 
Al1 Al 0.08158(15) 0.89571(15) 0.28732(15) 0.0401(5) Uani 1 1 d . . . 
Cl1 Cl 0.53691(14) 1.13443(12) 0.51981(12) 0.0484(5) Uani 1 1 d . . . 
P1 P 0.26867(13) 0.81564(12) 0.24303(11) 0.0327(4) Uani 1 1 d . . . 
P2 P 0.26546(13) 1.10669(12) 0.35056(11) 0.0314(4) Uani 1 1 d . . . 
N1 N 0.1349(4) 0.8135(4) 0.1864(3) 0.0402(13) Uani 1 1 d . . . 
N2 N 0.1223(4) 1.0505(4) 0.3011(4) 0.0371(12) Uani 1 1 d . . . 
C1 C 0.3791(6) 0.8599(5) 0.1915(4) 0.0442(16) Uani 1 1 d . . . 
C2 C 0.3593(6) 0.9136(5) 0.1221(5) 0.0502(18) Uani 1 1 d . . . 
H2A H 0.2850 0.9185 0.0919 0.060 Uiso 1 1 calc R . . 
C3 C 0.4546(9) 0.9603(6) 0.0988(6) 0.071(2) Uani 1 1 d . . . 
H3A H 0.4433 0.9979 0.0532 0.085 Uiso 1 1 calc R . . 
C4 C 0.5617(8) 0.9525(6) 0.1404(7) 0.071(2) Uani 1 1 d . . . 
H4A H 0.6229 0.9820 0.1218 0.085 Uiso 1 1 calc R . . 
C5 C 0.5807(7) 0.9016(6) 0.2095(6) 0.065(2) Uani 1 1 d . . . 
H5A H 0.6549 0.8962 0.2389 0.078 Uiso 1 1 calc R . . 
C6 C 0.4889(6) 0.8577(6) 0.2359(5) 0.0545(18) Uani 1 1 d . . . 
H6A H 0.5031 0.8257 0.2856 0.065 Uiso 1 1 calc R . . 
C7 C 0.2720(5) 0.6727(5) 0.2360(4) 0.0359(15) Uani 1 1 d . . . 
C8 C 0.3203(5) 0.6095(5) 0.1774(5) 0.0440(16) Uani 1 1 d . . . 
H8A H 0.3550 0.6397 0.1386 0.053 Uiso 1 1 calc R . . 
C9 C 0.3182(6) 0.5035(5) 0.1751(5) 0.0513(18) Uani 1 1 d . . . 
H9A H 0.3528 0.4619 0.1359 0.062 Uiso 1 1 calc R . . 
C10 C 0.2654(6) 0.4572(6) 0.2304(5) 0.0553(19) Uani 1 1 d . . . 
H10A H 0.2651 0.3849 0.2296 0.066 Uiso 1 1 calc R . . 
C11 C 0.2134(7) 0.5178(6) 0.2865(6) 0.061(2) Uani 1 1 d . . . 
H11A H 0.1738 0.4857 0.3215 0.073 Uiso 1 1 calc R . . 
C12 C 0.2197(6) 0.6260(5) 0.2909(5) 0.0535(18) Uani 1 1 d . . . 
H12A H 0.1878 0.6687 0.3321 0.064 Uiso 1 1 calc R . . 
C13 C 0.0551(6) 0.7340(5) 0.0804(5) 0.0522(19) Uani 1 1 d . . . 
C14 C 0.1174(7) 0.6902(6) 0.0106(5) 0.068(2) Uani 1 1 d . . . 
H14A H 0.1679 0.7535 0.0055 0.102 Uiso 1 1 calc R . . 
H14B H 0.0601 0.6409 -0.0566 0.102 Uiso 1 1 calc R . . 
H14C H 0.1638 0.6482 0.0385 0.102 Uiso 1 1 calc R . . 
C15 C -0.0171(8) 0.7993(6) 0.0337(6) 0.087(3) Uani 1 1 d . . . 
H15A H 0.0346 0.8643 0.0318 0.130 Uiso 1 1 calc R . . 
H15B H -0.0610 0.8247 0.0748 0.130 Uiso 1 1 calc R . . 
H15C H -0.0706 0.7504 -0.0350 0.130 Uiso 1 1 calc R . . 
C16 C -0.0240(6) 0.6319(6) 0.0843(6) 0.078(3) Uani 1 1 d . . . 
H16A H -0.0660 0.6569 0.1274 0.117 Uiso 1 1 calc R . . 
H16B H 0.0226 0.5900 0.1119 0.117 Uiso 1 1 calc R . . 
H16C H -0.0793 0.5836 0.0160 0.117 Uiso 1 1 calc R . . 
C17 C 0.3166(5) 1.1573(5) 0.2641(4) 0.0334(14) Uani 1 1 d . . . 
C18 C 0.2424(6) 1.1246(5) 0.1629(5) 0.0428(16) Uani 1 1 d . . . 
H18A H 0.1642 1.0799 0.1407 0.051 Uiso 1 1 calc R . . 
C19 C 0.2829(7) 1.1573(6) 0.0951(5) 0.0544(19) Uani 1 1 d . . . 
H19A H 0.2320 1.1340 0.0271 0.065 Uiso 1 1 calc R . . 
C20 C 0.3966(7) 1.2235(6) 0.1255(5) 0.0516(18) Uani 1 1 d . . . 
H20A H 0.4230 1.2475 0.0796 0.062 Uiso 1 1 calc R . . 
C21 C 0.4715(6) 1.2541(6) 0.2254(6) 0.0540(18) Uani 1 1 d . . . 
H21A H 0.5496 1.2988 0.2472 0.065 Uiso 1 1 calc R . . 
C22 C 0.4328(5) 1.2199(5) 0.2920(5) 0.0404(16) Uani 1 1 d . . . 
H22A H 0.4858 1.2389 0.3584 0.049 Uiso 1 1 calc R . . 
C23 C 0.3130(5) 1.2320(5) 0.4685(5) 0.0375(15) Uani 1 1 d . . . 
C24 C 0.3687(6) 1.3415(5) 0.4812(5) 0.0480(17) Uani 1 1 d . . . 
H24A H 0.3817 1.3569 0.4264 0.058 Uiso 1 1 calc R . . 
C25 C 0.4052(7) 1.4285(6) 0.5757(6) 0.060(2) Uani 1 1 d . . . 
H25A H 0.4433 1.5028 0.5846 0.072 Uiso 1 1 calc R . . 
C26 C 0.3867(6) 1.4074(7) 0.6547(6) 0.063(2) Uani 1 1 d . . . 
H26A H 0.4135 1.4671 0.7183 0.076 Uiso 1 1 calc R . . 
C27 C 0.3300(6) 1.3014(6) 0.6440(5) 0.0570(19) Uani 1 1 d . . . 
H27A H 0.3158 1.2878 0.6990 0.068 Uiso 1 1 calc R . . 
C28 C 0.2932(6) 1.2133(5) 0.5502(5) 0.0461(17) Uani 1 1 d . . . 
H28A H 0.2542 1.1396 0.5423 0.055 Uiso 1 1 calc R . . 
C29 C 0.0366(5) 1.1164(5) 0.2928(5) 0.0398(15) Uani 1 1 d . . . 
C30 C -0.0641(5) 1.0535(6) 0.1917(5) 0.0571(19) Uani 1 1 d . . . 
H30A H -0.1002 0.9777 0.1866 0.086 Uiso 1 1 calc R . . 
H30B H -0.0356 1.0491 0.1369 0.086 Uiso 1 1 calc R . . 
H30C H -0.1211 1.0932 0.1866 0.086 Uiso 1 1 calc R . . 
C31 C -0.0049(6) 1.1313(6) 0.3809(6) 0.0586(19) Uani 1 1 d . . . 
H31A H -0.0381 1.0578 0.3818 0.088 Uiso 1 1 calc R . . 
H31B H -0.0636 1.1689 0.3726 0.088 Uiso 1 1 calc R . . 
H31C H 0.0606 1.1768 0.4445 0.088 Uiso 1 1 calc R . . 
C32 C 0.0894(6) 1.2347(5) 0.2951(6) 0.0556(19) Uani 1 1 d . . . 
H32A H 0.1156 1.2279 0.2389 0.083 Uiso 1 1 calc R . . 
H32B H 0.1550 1.2784 0.3590 0.083 Uiso 1 1 calc R . . 
H32C H 0.0307 1.2725 0.2890 0.083 Uiso 1 1 calc R . . 
C33 C 0.1559(6) 0.8939(5) 0.4266(5) 0.0473(17) Uani 1 1 d . . . 
H33A H 0.2399 0.9273 0.4507 0.071 Uiso 1 1 calc R . . 
H33B H 0.1370 0.8165 0.4229 0.071 Uiso 1 1 calc R . . 
H33C H 0.1266 0.9371 0.4733 0.071 Uiso 1 1 calc R . . 
C34 C -0.0859(6) 0.8237(6) 0.2594(6) 0.067(2) Uani 1 1 d . . . 
H34A H -0.1337 0.8190 0.1930 0.100 Uiso 1 1 calc R . . 
H34B H -0.1080 0.8688 0.3113 0.100 Uiso 1 1 calc R . . 
H34C H -0.0976 0.7482 0.2604 0.100 Uiso 1 1 calc R . . 
C35 C 0.8541(10) 0.4545(7) 0.3567(7) 0.059(4) Uiso 0.45 1 d PG A 1 
C36 C 0.8263(11) 0.4472(9) 0.4393(7) 0.063(5) Uiso 0.45 1 d PGD A 1 
H36A H 0.8478 0.5127 0.4975 0.075 Uiso 0.45 1 calc PR A 1 
C37 C 0.7667(12) 0.3429(11) 0.4359(8) 0.088(12) Uiso 0.45 1 d PG A 1 
H37A H 0.7478 0.3380 0.4917 0.106 Uiso 0.45 1 calc PR A 1 
C38 C 0.7349(11) 0.2459(8) 0.3498(9) 0.068(5) Uiso 0.45 1 d PG A 1 
H38A H 0.6945 0.1754 0.3475 0.082 Uiso 0.45 1 calc PR A 1 
C39 C 0.7627(11) 0.2533(8) 0.2672(8) 0.074(5) Uiso 0.45 1 d PG A 1 
H39A H 0.7412 0.1877 0.2090 0.089 Uiso 0.45 1 calc PR A 1 
C40 C 0.8223(11) 0.3575(9) 0.2706(7) 0.074(5) Uiso 0.45 1 d PGD A 1 
H40A H 0.8412 0.3625 0.2148 0.089 Uiso 0.45 1 calc PR A 1 
C41 C 0.9159(18) 0.562(2) 0.3570(14) 0.082(11) Uiso 0.45 1 d PD A 1 
H41A H 0.9320 0.6218 0.4211 0.122 Uiso 0.45 1 calc PR A 1 
H41B H 0.8681 0.5767 0.3012 0.122 Uiso 0.45 1 calc PR A 1 
H41C H 0.9887 0.5585 0.3490 0.122 Uiso 0.45 1 calc PR A 1 
C35' C 0.8098(16) 0.3742(14) 0.3769(11) 0.052(7) Uiso 0.25 1 d PG B 2 
C36' C 0.870(2) 0.4897(14) 0.4217(12) 0.058(8) Uiso 0.25 1 d PGD B 2 
H36B H 0.8810 0.5306 0.4894 0.070 Uiso 0.25 1 calc PR B 2 
C37' C 0.913(2) 0.5447(14) 0.3662(18) 0.14(4) Uiso 0.25 1 d PG B 2 
H37B H 0.9538 0.6227 0.3965 0.171 Uiso 0.25 1 calc PR B 2 
C38' C 0.897(2) 0.4842(19) 0.2660(17) 0.075(9) Uiso 0.25 1 d PG B 2 
H38B H 0.9260 0.5214 0.2285 0.091 Uiso 0.25 1 calc PR B 2 
C39' C 0.837(2) 0.3688(19) 0.2213(12) 0.118(14) Uiso 0.25 1 d PG B 2 
H39B H 0.8254 0.3279 0.1535 0.141 Uiso 0.25 1 calc PR B 2 
C40' C 0.7932(18) 0.3138(14) 0.2767(11) 0.038(6) Uiso 0.25 1 d PGD B 2 
H40B H 0.7526 0.2357 0.2465 0.045 Uiso 0.25 1 calc PR B 2 
C41' C 0.764(2) 0.321(2) 0.4263(18) 0.045(12) Uiso 0.25 1 d PD B 2 
H41D H 0.7821 0.3736 0.4946 0.068 Uiso 0.25 1 calc PR B 2 
H41E H 0.7968 0.2606 0.4304 0.068 Uiso 0.25 1 calc PR B 2 
H41F H 0.6803 0.2891 0.3906 0.068 Uiso 0.25 1 calc PR B 2 
C42 C 0.6303(10) 0.4823(12) 0.0751(11) 0.053(3) Uiso 0.25 1 d PGD C -3 
C43 C 0.5359(12) 0.3886(10) 0.0046(12) 0.053(3) Uiso 0.25 1 d PGD C -3 
H43A H 0.5398 0.3153 -0.0044 0.064 Uiso 0.25 1 calc PR C -3 
C44 C 0.4358(11) 0.4032(13) -0.0527(12) 0.053(3) Uiso 0.25 1 d PG C -3 
H44A H 0.3719 0.3398 -0.1004 0.064 Uiso 0.25 1 calc PR C -3 
C45 C 0.4300(12) 0.5115(16) -0.0395(13) 0.053(3) Uiso 0.25 1 d PG C -3 
H45A H 0.3623 0.5214 -0.0783 0.064 Uiso 0.25 1 calc PR C -3 
C46 C 0.5244(14) 0.6053(12) 0.0310(13) 0.053(3) Uiso 0.25 1 d PG C -3 
H46A H 0.5205 0.6785 0.0400 0.064 Uiso 0.25 1 calc PR C -3 
C47 C 0.6245(11) 0.5907(11) 0.0883(11) 0.053(3) Uiso 0.25 1 d PGD C -3 
H47A H 0.6884 0.6541 0.1360 0.064 Uiso 0.25 1 calc PR C -3 
C48 C 0.7323(17) 0.4647(18) 0.1344(17) 0.053(3) Uiso 0.25 1 d PD C -3 
H48A H 0.7205 0.3842 0.1145 0.080 Uiso 0.25 1 calc PR C -3 
H48B H 0.7457 0.4975 0.2061 0.080 Uiso 0.25 1 calc PR C -3 
H48C H 0.7995 0.5004 0.1223 0.080 Uiso 0.25 1 calc PR C -3 
  
loop_ 
 _atom_site_aniso_label 
 _atom_site_aniso_U_11 
 _atom_site_aniso_U_22 
 _atom_site_aniso_U_33 
 _atom_site_aniso_U_23 
 _atom_site_aniso_U_13 
 _atom_site_aniso_U_12 
Cr1 0.0375(6) 0.0278(6) 0.0337(5) 0.0126(4) 0.0015(4) 0.0104(4) 
Al1 0.0346(11) 0.0324(11) 0.0580(12) 0.0230(9) 0.0189(9) 0.0094(8) 
Cl1 0.0460(10) 0.0301(9) 0.0524(10) 0.0172(7) -0.0051(8) 0.0101(7) 
P1 0.0346(9) 0.0280(9) 0.0342(8) 0.0142(7) 0.0098(7) 0.0081(7) 
P2 0.0295(9) 0.0273(9) 0.0397(9) 0.0171(7) 0.0118(7) 0.0091(7) 
N1 0.039(3) 0.026(3) 0.041(3) 0.009(2) 0.000(2) 0.006(2) 
N2 0.036(3) 0.037(3) 0.050(3) 0.025(2) 0.019(2) 0.016(2) 
C1 0.061(5) 0.032(4) 0.036(3) 0.013(3) 0.017(3) 0.009(3) 
C2 0.069(5) 0.043(4) 0.055(4) 0.027(3) 0.035(4) 0.022(4) 
C3 0.120(8) 0.063(5) 0.074(5) 0.046(4) 0.067(6) 0.043(5) 
C4 0.079(6) 0.056(5) 0.097(6) 0.034(5) 0.058(5) 0.019(5) 
C5 0.049(5) 0.065(5) 0.088(6) 0.031(5) 0.035(4) 0.015(4) 
C6 0.046(4) 0.057(5) 0.059(4) 0.026(4) 0.016(4) 0.012(4) 
C7 0.040(4) 0.029(3) 0.036(3) 0.014(3) 0.011(3) 0.008(3) 
C8 0.045(4) 0.042(4) 0.054(4) 0.020(3) 0.024(3) 0.019(3) 
C9 0.062(5) 0.033(4) 0.059(4) 0.011(3) 0.026(4) 0.022(3) 
C10 0.064(5) 0.030(4) 0.065(5) 0.018(4) 0.015(4) 0.014(4) 
C11 0.087(6) 0.041(4) 0.081(5) 0.037(4) 0.050(5) 0.024(4) 
C12 0.074(5) 0.040(4) 0.059(4) 0.022(3) 0.036(4) 0.021(4) 
C13 0.051(4) 0.041(4) 0.045(4) 0.010(3) -0.002(3) 0.013(4) 
C14 0.081(6) 0.064(5) 0.041(4) 0.012(4) 0.005(4) 0.022(4) 
C15 0.101(7) 0.063(5) 0.059(5) 0.012(4) -0.018(5) 0.038(5) 
C16 0.057(5) 0.039(5) 0.093(6) 0.001(4) 0.001(4) -0.001(4) 
C17 0.034(4) 0.027(3) 0.043(4) 0.015(3) 0.013(3) 0.016(3) 
C18 0.043(4) 0.037(4) 0.047(4) 0.017(3) 0.011(3) 0.018(3) 
C19 0.069(5) 0.071(5) 0.044(4) 0.036(4) 0.021(4) 0.041(4) 
C20 0.068(5) 0.058(5) 0.058(4) 0.040(4) 0.040(4) 0.028(4) 
C21 0.050(4) 0.049(4) 0.075(5) 0.027(4) 0.036(4) 0.014(3) 
C22 0.039(4) 0.037(4) 0.047(4) 0.019(3) 0.015(3) 0.012(3) 
C23 0.028(3) 0.036(4) 0.049(4) 0.019(3) 0.012(3) 0.012(3) 
C24 0.050(4) 0.038(4) 0.057(4) 0.017(3) 0.028(3) 0.006(3) 
C25 0.075(5) 0.031(4) 0.066(5) 0.007(4) 0.035(4) 0.005(4) 
C26 0.057(5) 0.056(5) 0.058(5) 0.006(4) 0.015(4) 0.013(4) 
C27 0.061(5) 0.060(5) 0.042(4) 0.014(4) 0.014(4) 0.020(4) 
C28 0.060(4) 0.042(4) 0.040(4) 0.018(3) 0.021(3) 0.017(3) 
C29 0.024(3) 0.038(4) 0.054(4) 0.016(3) 0.011(3) 0.011(3) 
C30 0.041(4) 0.055(5) 0.070(5) 0.026(4) 0.009(4) 0.018(3) 
C31 0.041(4) 0.080(5) 0.077(5) 0.042(4) 0.034(4) 0.029(4) 
C32 0.045(4) 0.045(4) 0.084(5) 0.032(4) 0.021(4) 0.023(3) 
C33 0.054(4) 0.040(4) 0.065(4) 0.028(3) 0.034(4) 0.019(3) 
C34 0.050(4) 0.053(5) 0.098(6) 0.035(4) 0.029(4) 0.006(4) 
  
_geom_special_details 
; 
 All esds (except the esd in the dihedral angle between two l.s. planes) 
 are estimated using the full covariance matrix.  The cell esds are taken 
 into account individually in the estimation of esds in distances, angles 
 and torsion angles; correlations between esds in cell parameters are only 
 used when they are defined by crystal symmetry.  An approximate (isotropic) 
 treatment of cell esds is used for estimating esds involving l.s. planes. 
; 
  
loop_ 
 _geom_bond_atom_site_label_1 
 _geom_bond_atom_site_label_2 
 _geom_bond_distance 
 _geom_bond_site_symmetry_2 
 _geom_bond_publ_flag 
Cr1 Cl1 2.3773(16) 2_676 ? 
Cr1 Cl1 2.3867(17) . ? 
Cr1 P1 2.4476(17) . ? 
Cr1 P2 2.5196(17) . ? 
Al1 N2 1.910(5) . ? 
Al1 N1 1.945(5) . ? 
Al1 C34 1.993(7) . ? 
Al1 C33 2.013(6) . ? 
Cl1 Cr1 2.3772(17) 2_676 ? 
P1 N1 1.646(5) . ? 
P1 C1 1.843(7) . ? 
P1 C7 1.848(6) . ? 
P2 N2 1.647(5) . ? 
P2 C17 1.813(6) . ? 
P2 C23 1.842(6) . ? 
N1 C13 1.500(7) . ? 
N2 C29 1.518(7) . ? 
C1 C6 1.364(9) . ? 
C1 C2 1.399(8) . ? 
C2 C3 1.413(10) . ? 
C3 C4 1.354(11) . ? 
C4 C5 1.367(11) . ? 
C5 C6 1.394(9) . ? 
C7 C12 1.379(8) . ? 
C7 C8 1.379(8) . ? 
C8 C9 1.370(8) . ? 
C9 C10 1.384(9) . ? 
C10 C11 1.377(10) . ? 
C11 C12 1.378(9) . ? 
C13 C15 1.530(9) . ? 
C13 C14 1.525(10) . ? 
C13 C16 1.517(10) . ? 
C17 C22 1.395(8) . ? 
C17 C18 1.398(8) . ? 
C18 C19 1.382(9) . ? 
C19 C20 1.375(10) . ? 
C20 C21 1.389(9) . ? 
C21 C22 1.363(9) . ? 
C23 C28 1.382(8) . ? 
C23 C24 1.385(8) . ? 
C24 C25 1.392(9) . ? 
C25 C26 1.349(10) . ? 
C26 C27 1.359(10) . ? 
C27 C28 1.390(9) . ? 
C29 C30 1.509(8) . ? 
C29 C31 1.517(9) . ? 
C29 C32 1.535(8) . ? 
C35 C36 1.3900 . ? 
C35 C40 1.3900 . ? 
C35 C41 1.45(3) . ? 
C36 C37 1.3900 . ? 
C37 C38 1.3900 . ? 
C38 C39 1.3900 . ? 
C39 C40 1.3900 . ? 
C35' C41' 1.31(3) . ? 
C35' C36' 1.3900 . ? 
C35' C40' 1.3900 . ? 
C36' C37' 1.3900 . ? 
C37' C38' 1.3900 . ? 
C38' C39' 1.3900 . ? 
C39' C40' 1.3900 . ? 
C42 C43 1.3900 . ? 
C42 C47 1.3900 . ? 
C42 C48 1.440(16) . ? 
C43 C44 1.3900 . ? 
C44 C45 1.3900 . ? 
C45 C46 1.3900 . ? 
C46 C47 1.3900 . ? 
  
loop_ 
 _geom_angle_atom_site_label_1 
 _geom_angle_atom_site_label_2 
 _geom_angle_atom_site_label_3 
 _geom_angle 
 _geom_angle_site_symmetry_1 
 _geom_angle_site_symmetry_3 
 _geom_angle_publ_flag 
Cl1 Cr1 Cl1 86.42(6) 2_676 . ? 
Cl1 Cr1 P1 90.73(6) 2_676 . ? 
Cl1 Cr1 P1 148.81(8) . . ? 
Cl1 Cr1 P2 172.32(7) 2_676 . ? 
Cl1 Cr1 P2 90.53(6) . . ? 
P1 Cr1 P2 95.51(6) . . ? 
N2 Al1 N1 108.2(2) . . ? 
N2 Al1 C34 114.7(3) . . ? 
N1 Al1 C34 113.1(3) . . ? 
N2 Al1 C33 106.9(2) . . ? 
N1 Al1 C33 113.6(2) . . ? 
C34 Al1 C33 100.1(3) . . ? 
Cr1 Cl1 Cr1 93.58(6) 2_676 . ? 
N1 P1 C1 117.9(3) . . ? 
N1 P1 C7 111.0(2) . . ? 
C1 P1 C7 102.7(3) . . ? 
N1 P1 Cr1 110.82(18) . . ? 
C1 P1 Cr1 93.56(19) . . ? 
C7 P1 Cr1 119.94(19) . . ? 
N2 P2 C17 110.3(2) . . ? 
N2 P2 C23 111.0(3) . . ? 
C17 P2 C23 105.6(3) . . ? 
N2 P2 Cr1 112.99(17) . . ? 
C17 P2 Cr1 112.66(18) . . ? 
C23 P2 Cr1 103.90(18) . . ? 
C13 N1 P1 124.5(4) . . ? 
C13 N1 Al1 123.8(4) . . ? 
P1 N1 Al1 109.6(2) . . ? 
C29 N2 P2 125.2(4) . . ? 
C29 N2 Al1 124.0(4) . . ? 
P2 N2 Al1 109.1(2) . . ? 
C6 C1 C2 119.2(6) . . ? 
C6 C1 P1 118.1(5) . . ? 
C2 C1 P1 121.7(5) . . ? 
C1 C2 C3 117.9(7) . . ? 
C4 C3 C2 121.8(7) . . ? 
C3 C4 C5 119.9(8) . . ? 
C6 C5 C4 119.4(8) . . ? 
C5 C6 C1 121.8(7) . . ? 
C12 C7 C8 118.5(6) . . ? 
C12 C7 P1 117.4(5) . . ? 
C8 C7 P1 124.1(5) . . ? 
C9 C8 C7 120.8(6) . . ? 
C10 C9 C8 120.2(6) . . ? 
C9 C10 C11 119.6(6) . . ? 
C12 C11 C10 119.4(7) . . ? 
C7 C12 C11 121.3(6) . . ? 
C15 C13 C14 107.8(6) . . ? 
C15 C13 C16 110.4(6) . . ? 
C14 C13 C16 107.4(6) . . ? 
C15 C13 N1 106.9(5) . . ? 
C14 C13 N1 114.5(5) . . ? 
C16 C13 N1 109.8(6) . . ? 
C22 C17 C18 117.3(6) . . ? 
C22 C17 P2 122.0(4) . . ? 
C18 C17 P2 120.4(5) . . ? 
C19 C18 C17 120.6(6) . . ? 
C20 C19 C18 121.0(6) . . ? 
C19 C20 C21 118.6(6) . . ? 
C20 C21 C22 120.6(6) . . ? 
C17 C22 C21 121.7(6) . . ? 
C28 C23 C24 118.5(6) . . ? 
C28 C23 P2 116.6(4) . . ? 
C24 C23 P2 124.9(5) . . ? 
C23 C24 C25 119.4(7) . . ? 
C26 C25 C24 120.8(7) . . ? 
C27 C26 C25 121.1(7) . . ? 
C26 C27 C28 118.9(7) . . ? 
C23 C28 C27 121.2(6) . . ? 
C30 C29 N2 108.6(5) . . ? 
C30 C29 C31 111.3(5) . . ? 
N2 C29 C31 109.8(5) . . ? 
C30 C29 C32 106.5(5) . . ? 
N2 C29 C32 113.1(5) . . ? 
C31 C29 C32 107.5(5) . . ? 
C36 C35 C40 120.0 . . ? 
C36 C35 C41 121.7(7) . . ? 
C40 C35 C41 118.3(7) . . ? 
C35 C36 C37 120.0 . . ? 
C38 C37 C36 120.0 . . ? 
C37 C38 C39 120.0 . . ? 
C40 C39 C38 120.0 . . ? 
C39 C40 C35 120.0 . . ? 
C41' C35' C36' 121.3(8) . . ? 
C41' C35' C40' 118.7(8) . . ? 
C36' C35' C40' 120.0 . . ? 
C37' C36' C35' 120.0 . . ? 
C36' C37' C38' 120.0 . . ? 
C37' C38' C39' 120.0 . . ? 
C38' C39' C40' 120.0 . . ? 
C39' C40' C35' 120.0 . . ? 
C43 C42 C47 120.0 . . ? 
C43 C42 C48 118.8(7) . . ? 
C47 C42 C48 121.2(7) . . ? 
C42 C43 C44 120.0 . . ? 
C45 C44 C43 120.0 . . ? 
C44 C45 C46 120.0 . . ? 
C47 C46 C45 120.0 . . ? 
C46 C47 C42 120.0 . . ? 
  
loop_ 
 _geom_torsion_atom_site_label_1 
 _geom_torsion_atom_site_label_2 
 _geom_torsion_atom_site_label_3 
 _geom_torsion_atom_site_label_4 
 _geom_torsion 
 _geom_torsion_site_symmetry_1 
 _geom_torsion_site_symmetry_2 
 _geom_torsion_site_symmetry_3 
 _geom_torsion_site_symmetry_4 
 _geom_torsion_publ_flag 
Cl1 Cr1 Cl1 Cr1 0.0 2_676 . . 2_676 ? 
P1 Cr1 Cl1 Cr1 -85.48(12) . . . 2_676 ? 
P2 Cr1 Cl1 Cr1 172.94(8) . . . 2_676 ? 
Cl1 Cr1 P1 N1 143.1(2) 2_676 . . . ? 
Cl1 Cr1 P1 N1 -132.7(2) . . . . ? 
P2 Cr1 P1 N1 -32.5(2) . . . . ? 
Cl1 Cr1 P1 C1 -95.2(2) 2_676 . . . ? 
Cl1 Cr1 P1 C1 -10.9(2) . . . . ? 
P2 Cr1 P1 C1 89.3(2) . . . . ? 
Cl1 Cr1 P1 C7 11.7(2) 2_676 . . . ? 
Cl1 Cr1 P1 C7 95.9(3) . . . . ? 
P2 Cr1 P1 C7 -163.8(2) . . . . ? 
Cl1 Cr1 P2 N2 -91.5(5) 2_676 . . . ? 
Cl1 Cr1 P2 N2 -158.0(2) . . . . ? 
P1 Cr1 P2 N2 52.6(2) . . . . ? 
Cl1 Cr1 P2 C17 142.7(5) 2_676 . . . ? 
Cl1 Cr1 P2 C17 76.2(2) . . . . ? 
P1 Cr1 P2 C17 -73.2(2) . . . . ? 
Cl1 Cr1 P2 C23 28.9(6) 2_676 . . . ? 
Cl1 Cr1 P2 C23 -37.6(2) . . . . ? 
P1 Cr1 P2 C23 173.1(2) . . . . ? 
C1 P1 N1 C13 66.9(5) . . . . ? 
C7 P1 N1 C13 -51.2(6) . . . . ? 
Cr1 P1 N1 C13 172.9(4) . . . . ? 
C1 P1 N1 Al1 -129.4(3) . . . . ? 
C7 P1 N1 Al1 112.6(3) . . . . ? 
Cr1 P1 N1 Al1 -23.3(3) . . . . ? 
N2 Al1 N1 C13 -105.8(5) . . . . ? 
C34 Al1 N1 C13 22.4(5) . . . . ? 
C33 Al1 N1 C13 135.6(5) . . . . ? 
N2 Al1 N1 P1 90.2(3) . . . . ? 
C34 Al1 N1 P1 -141.5(3) . . . . ? 
C33 Al1 N1 P1 -28.3(3) . . . . ? 
C17 P2 N2 C29 -74.1(5) . . . . ? 
C23 P2 N2 C29 42.5(5) . . . . ? 
Cr1 P2 N2 C29 158.8(4) . . . . ? 
C17 P2 N2 Al1 120.1(3) . . . . ? 
C23 P2 N2 Al1 -123.2(3) . . . . ? 
Cr1 P2 N2 Al1 -6.9(3) . . . . ? 
N1 Al1 N2 C29 127.8(4) . . . . ? 
C34 Al1 N2 C29 0.5(6) . . . . ? 
C33 Al1 N2 C29 -109.5(5) . . . . ? 
N1 Al1 N2 P2 -66.3(3) . . . . ? 
C34 Al1 N2 P2 166.5(3) . . . . ? 
C33 Al1 N2 P2 56.5(3) . . . . ? 
N1 P1 C1 C6 -177.6(5) . . . . ? 
C7 P1 C1 C6 -55.2(5) . . . . ? 
Cr1 P1 C1 C6 66.6(5) . . . . ? 
N1 P1 C1 C2 14.0(6) . . . . ? 
C7 P1 C1 C2 136.3(5) . . . . ? 
Cr1 P1 C1 C2 -101.9(5) . . . . ? 
C6 C1 C2 C3 2.0(9) . . . . ? 
P1 C1 C2 C3 170.3(5) . . . . ? 
C1 C2 C3 C4 1.1(11) . . . . ? 
C2 C3 C4 C5 -2.2(12) . . . . ? 
C3 C4 C5 C6 0.3(12) . . . . ? 
C4 C5 C6 C1 2.8(11) . . . . ? 
C2 C1 C6 C5 -3.9(10) . . . . ? 
P1 C1 C6 C5 -172.6(5) . . . . ? 
N1 P1 C7 C12 -68.2(5) . . . . ? 
C1 P1 C7 C12 164.9(5) . . . . ? 
Cr1 P1 C7 C12 63.1(5) . . . . ? 
N1 P1 C7 C8 109.9(5) . . . . ? 
C1 P1 C7 C8 -17.0(6) . . . . ? 
Cr1 P1 C7 C8 -118.7(5) . . . . ? 
C12 C7 C8 C9 -1.1(9) . . . . ? 
P1 C7 C8 C9 -179.2(5) . . . . ? 
C7 C8 C9 C10 1.2(10) . . . . ? 
C8 C9 C10 C11 1.0(10) . . . . ? 
C9 C10 C11 C12 -3.2(10) . . . . ? 
C8 C7 C12 C11 -1.2(9) . . . . ? 
P1 C7 C12 C11 177.0(6) . . . . ? 
C10 C11 C12 C7 3.4(11) . . . . ? 
P1 N1 C13 C15 -144.8(6) . . . . ? 
Al1 N1 C13 C15 53.6(7) . . . . ? 
P1 N1 C13 C14 -25.5(8) . . . . ? 
Al1 N1 C13 C14 172.9(4) . . . . ? 
P1 N1 C13 C16 95.4(6) . . . . ? 
Al1 N1 C13 C16 -66.2(6) . . . . ? 
N2 P2 C17 C22 172.7(4) . . . . ? 
C23 P2 C17 C22 52.7(5) . . . . ? 
Cr1 P2 C17 C22 -60.0(5) . . . . ? 
N2 P2 C17 C18 -13.9(5) . . . . ? 
C23 P2 C17 C18 -133.9(5) . . . . ? 
Cr1 P2 C17 C18 113.3(4) . . . . ? 
C22 C17 C18 C19 -2.4(8) . . . . ? 
P2 C17 C18 C19 -176.0(5) . . . . ? 
C17 C18 C19 C20 -0.6(10) . . . . ? 
C18 C19 C20 C21 2.1(10) . . . . ? 
C19 C20 C21 C22 -0.5(10) . . . . ? 
C18 C17 C22 C21 4.0(8) . . . . ? 
P2 C17 C22 C21 177.5(5) . . . . ? 
C20 C21 C22 C17 -2.6(9) . . . . ? 
N2 P2 C23 C28 66.1(5) . . . . ? 
C17 P2 C23 C28 -174.4(4) . . . . ? 
Cr1 P2 C23 C28 -55.6(5) . . . . ? 
N2 P2 C23 C24 -115.4(5) . . . . ? 
C17 P2 C23 C24 4.1(6) . . . . ? 
Cr1 P2 C23 C24 122.8(5) . . . . ? 
C28 C23 C24 C25 1.4(9) . . . . ? 
P2 C23 C24 C25 -177.0(5) . . . . ? 
C23 C24 C25 C26 -0.2(11) . . . . ? 
C24 C25 C26 C27 -1.3(11) . . . . ? 
C25 C26 C27 C28 1.5(11) . . . . ? 
C24 C23 C28 C27 -1.2(9) . . . . ? 
P2 C23 C28 C27 177.4(5) . . . . ? 
C26 C27 C28 C23 -0.2(10) . . . . ? 
P2 N2 C29 C30 140.6(5) . . . . ? 
Al1 N2 C29 C30 -55.7(6) . . . . ? 
P2 N2 C29 C31 -97.4(6) . . . . ? 
Al1 N2 C29 C31 66.3(6) . . . . ? 
P2 N2 C29 C32 22.7(7) . . . . ? 
Al1 N2 C29 C32 -173.6(4) . . . . ? 
C40 C35 C36 C37 0.0 . . . . ? 
C41 C35 C36 C37 179.7(14) . . . . ? 
C35 C36 C37 C38 0.0 . . . . ? 
C36 C37 C38 C39 0.0 . . . . ? 
C37 C38 C39 C40 0.0 . . . . ? 
C38 C39 C40 C35 0.0 . . . . ? 
C36 C35 C40 C39 0.0 . . . . ? 
C41 C35 C40 C39 -179.7(14) . . . . ? 
C41' C35' C36' C37' -178(2) . . . . ? 
C40' C35' C36' C37' 0.0 . . . . ? 
C35' C36' C37' C38' 0.0 . . . . ? 
C36' C37' C38' C39' 0.0 . . . . ? 
C37' C38' C39' C40' 0.0 . . . . ? 
C38' C39' C40' C35' 0.0 . . . . ? 
C41' C35' C40' C39' 178(2) . . . . ? 
C36' C35' C40' C39' 0.0 . . . . ? 
C47 C42 C43 C44 0.0 . . . . ? 
C48 C42 C43 C44 179.2(15) . . . . ? 
C42 C43 C44 C45 0.0 . . . . ? 
C43 C44 C45 C46 0.0 . . . . ? 
C44 C45 C46 C47 0.0 . . . . ? 
C45 C46 C47 C42 0.0 . . . . ? 
C43 C42 C47 C46 0.0 . . . . ? 
C48 C42 C47 C46 -179.2(15) . . . . ? 
  
_diffrn_measured_fraction_theta_max    0.954 
_diffrn_reflns_theta_full              24.82 
_diffrn_measured_fraction_theta_full   0.954 
_refine_diff_density_max    1.007 
_refine_diff_density_min   -0.765 
_refine_diff_density_rms    0.080 

							#===END

Data Complex 7


_audit_creation_method            SHELXL-97 
_chemical_name_systematic 
; 
 ? 
; 
_chemical_name_common             ? 
_chemical_melting_point           ? 
_chemical_formula_moiety          ? 
_chemical_formula_sum 
 'C55 H65 Cr N3 P3' 
_chemical_formula_weight          913.01 
  
loop_ 
 _atom_type_symbol 
 _atom_type_description 
 _atom_type_scat_dispersion_real 
 _atom_type_scat_dispersion_imag 
 _atom_type_scat_source 
 'C'  'C'   0.0033   0.0016 
 'International Tables Vol C Tables 4.2.6.8 and 6.1.1.4' 
 'H'  'H'   0.0000   0.0000 
 'International Tables Vol C Tables 4.2.6.8 and 6.1.1.4' 
 'N'  'N'   0.0061   0.0033 
 'International Tables Vol C Tables 4.2.6.8 and 6.1.1.4' 
 'P'  'P'   0.1023   0.0942 
 'International Tables Vol C Tables 4.2.6.8 and 6.1.1.4' 
 'Cr'  'Cr'   0.3209   0.6236 
 'International Tables Vol C Tables 4.2.6.8 and 6.1.1.4' 
  
_symmetry_cell_setting            Trigonal 
_symmetry_space_group_name_H-M    P-3 
  
loop_ 
 _symmetry_equiv_pos_as_xyz 
 'x, y, z' 
 '-y, x-y, z' 
 '-x+y, -x, z' 
 '-x, -y, -z' 
 'y, -x+y, -z' 
 'x-y, x, -z' 
  
_cell_length_a                    21.772(3) 
_cell_length_b                    21.772(3) 
_cell_length_c                    18.456(3) 
_cell_angle_alpha                 90.00 
_cell_angle_beta                  90.00 
_cell_angle_gamma                 120.00 
_cell_volume                      7576(2) 
_cell_formula_units_Z             6 
_cell_measurement_temperature     202(2) 
_cell_measurement_reflns_used     6467 
_cell_measurement_theta_min       2.17 
_cell_measurement_theta_max       23.32 
  
_exptl_crystal_description        block 
_exptl_crystal_colour             green 
_exptl_crystal_size_max           0.21 
_exptl_crystal_size_mid           0.16 
_exptl_crystal_size_min           0.11 
_exptl_crystal_density_meas       ? 
_exptl_crystal_density_diffrn     1.201 
_exptl_crystal_density_method     'not measured' 
_exptl_crystal_F_000              2910 
_exptl_absorpt_coefficient_mu     0.360 
_exptl_absorpt_correction_type    multi-scan 
_exptl_absorpt_correction_T_min   0.9283 
_exptl_absorpt_correction_T_max   0.9615 
_exptl_absorpt_process_details    'SADABS, Bruker (2003)' 
  
_exptl_special_details 
; 
 Data collection is performed with three batch runs at phi = 0.00 deg 
 (650 frames), at phi = 120.00 deg (650 frames), and at phi = 240.00 deg 
 (650 frames). 
 Frame width = 0.30 deg in omega. 
 Data is merged, corrected for decay (if any), and treated with multi-scan 
 absorption corrections (if required). All symmetry-equivalent reflections 
 are merged for centrosymmetric data. 
 Friedel pairs are not merged for noncentrosymmetric data. 
; 
  
_diffrn_ambient_temperature       202(2) 
_diffrn_radiation_wavelength      0.71073 
_diffrn_radiation_type            MoK\a 
_diffrn_radiation_source          'fine-focus sealed tube' 
_diffrn_radiation_monochromator   graphite 
_diffrn_measurement_device_type   'Bruker SMART 1K CCD' 
_diffrn_measurement_method        '\f and \w scans' 
_diffrn_detector_area_resol_mean  ? 
_diffrn_reflns_number             62673 
_diffrn_reflns_av_R_equivalents   0.1019 
_diffrn_reflns_av_sigmaI/netI     0.0511 
_diffrn_reflns_limit_h_min        -23 
_diffrn_reflns_limit_h_max        23 
_diffrn_reflns_limit_k_min        -23 
_diffrn_reflns_limit_k_max        23 
_diffrn_reflns_limit_l_min        -20 
_diffrn_reflns_limit_l_max        20 
_diffrn_reflns_theta_min          1.54 
_diffrn_reflns_theta_max          22.72 
_reflns_number_total              6752 
_reflns_number_gt                 4924 
_reflns_threshold_expression      >2sigma(I) 
  
_computing_data_collection        'SMART, Bruker (2009)' 
_computing_cell_refinement        'SMART, Bruker (2009)' 
_computing_data_reduction         'XPREP, Bruker (2009)' 
_computing_structure_solution     'SHELXS-97 (Sheldrick, 2008)' 
_computing_structure_refinement   'SHELXL-97 (Sheldrick, 2008)' 
_computing_molecular_graphics     'SHELXTL, Bruker (2004)' 
_computing_publication_material   'SHELXTL, Bruker (2004)' 
  
_refine_special_details 
; 
 Refinement of F^2^ against ALL reflections.  The weighted R-factor wR and 
 goodness of fit S are based on F^2^, conventional R-factors R are based 
 on F, with F set to zero for negative F^2^. The threshold expression of 
 F^2^ > 2sigma(F^2^) is used only for calculating R-factors(gt) etc. and is 
 not relevant to the choice of reflections for refinement.  R-factors based 
 on F^2^ are statistically about twice as large as those based on F, and R- 
 factors based on ALL data will be even larger. 
; 
  
_refine_ls_structure_factor_coef  Fsqd 
_refine_ls_matrix_type            full 
_refine_ls_weighting_scheme       calc 
_refine_ls_weighting_details 
 'calc w=1/[\s^2^(Fo^2^)+(0.0732P)^2^+18.5261P] where P=(Fo^2^+2Fc^2^)/3' 
_atom_sites_solution_primary      direct 
_atom_sites_solution_secondary    difmap 
_atom_sites_solution_hydrogens    geom 
_refine_ls_hydrogen_treatment     constr 
_refine_ls_extinction_method      none 
_refine_ls_extinction_coef        ? 
_refine_ls_number_reflns          6752 
_refine_ls_number_parameters      512 
_refine_ls_number_restraints      0 
_refine_ls_R_factor_all           0.0927 
_refine_ls_R_factor_gt            0.0640 
_refine_ls_wR_factor_ref          0.1725 
_refine_ls_wR_factor_gt           0.1515 
_refine_ls_goodness_of_fit_ref    1.034 
_refine_ls_restrained_S_all       1.034 
_refine_ls_shift/su_max           0.001 
_refine_ls_shift/su_mean          0.000 
  
loop_ 
 _atom_site_label 
 _atom_site_type_symbol 
 _atom_site_fract_x 
 _atom_site_fract_y 
 _atom_site_fract_z 
 _atom_site_U_iso_or_equiv 
 _atom_site_adp_type 
 _atom_site_occupancy 
 _atom_site_symmetry_multiplicity 
 _atom_site_calc_flag 
 _atom_site_refinement_flags 
 _atom_site_disorder_assembly 
 _atom_site_disorder_group 
Cr1 Cr 0.0000 0.0000 0.74022(7) 0.0260(3) Uani 1 3 d S . . 
Cr2 Cr 0.6667 0.3333 0.72422(7) 0.0300(3) Uani 1 3 d S . . 
Cr3 Cr 0.6667 0.3333 0.23755(7) 0.0312(3) Uani 1 3 d S . . 
N1 N 0.06584(19) 0.10095(19) 0.7079(2) 0.0316(9) Uani 1 1 d . . . 
N2 N 0.6118(2) 0.2311(2) 0.6893(2) 0.0351(10) Uani 1 1 d . . . 
N3 N 0.7430(2) 0.4311(2) 0.2718(2) 0.0390(10) Uani 1 1 d . . . 
P1 P 0.04316(6) 0.11891(6) 0.78485(6) 0.0287(3) Uani 1 1 d . . . 
P2 P 0.63834(7) 0.21953(6) 0.76757(7) 0.0334(3) Uani 1 1 d . . . 
P3 P 0.71979(7) 0.45261(6) 0.19654(7) 0.0336(3) Uani 1 1 d . . . 
C1 C 0.1146(2) 0.1637(3) 0.8523(2) 0.0326(11) Uani 1 1 d . . . 
C2 C 0.1301(3) 0.1235(3) 0.8982(3) 0.0476(14) Uani 1 1 d . . . 
H2A H 0.1031 0.0733 0.8953 0.057 Uiso 1 1 calc R . . 
C3 C 0.1842(4) 0.1549(4) 0.9486(3) 0.0657(19) Uani 1 1 d . . . 
H3A H 0.1945 0.1262 0.9795 0.079 Uiso 1 1 calc R . . 
C4 C 0.2229(3) 0.2268(4) 0.9539(3) 0.0583(17) Uani 1 1 d . . . 
H4A H 0.2602 0.2484 0.9883 0.070 Uiso 1 1 calc R . . 
C5 C 0.2080(3) 0.2681(3) 0.9098(3) 0.0566(16) Uani 1 1 d . . . 
H5A H 0.2348 0.3183 0.9137 0.068 Uiso 1 1 calc R . . 
C6 C 0.1538(3) 0.2367(3) 0.8592(3) 0.0463(14) Uani 1 1 d . . . 
H6A H 0.1435 0.2657 0.8289 0.056 Uiso 1 1 calc R . . 
C7 C 0.0090(2) 0.1808(2) 0.7835(3) 0.0346(12) Uani 1 1 d . . . 
C8 C -0.0184(3) 0.1904(3) 0.8488(3) 0.0398(12) Uani 1 1 d . . . 
H8A H -0.0178 0.1658 0.8911 0.048 Uiso 1 1 calc R . . 
C9 C -0.0458(3) 0.2350(3) 0.8521(3) 0.0491(14) Uani 1 1 d . . . 
H9A H -0.0640 0.2411 0.8967 0.059 Uiso 1 1 calc R . . 
C10 C -0.0471(3) 0.2708(3) 0.7915(4) 0.0594(17) Uani 1 1 d . . . 
H10A H -0.0662 0.3016 0.7940 0.071 Uiso 1 1 calc R . . 
C11 C -0.0208(3) 0.2620(3) 0.7275(3) 0.0561(16) Uani 1 1 d . . . 
H11A H -0.0212 0.2873 0.6857 0.067 Uiso 1 1 calc R . . 
C12 C 0.0065(3) 0.2167(3) 0.7229(3) 0.0451(13) Uani 1 1 d . . . 
H12A H 0.0236 0.2103 0.6778 0.054 Uiso 1 1 calc R . . 
C13 C 0.1219(3) 0.1416(2) 0.6527(3) 0.0349(12) Uani 1 1 d . . . 
C14 C 0.0852(3) 0.1348(3) 0.5798(3) 0.0509(15) Uani 1 1 d . . . 
H14A H 0.0558 0.0845 0.5673 0.076 Uiso 1 1 calc R . . 
H14B H 0.1211 0.1590 0.5421 0.076 Uiso 1 1 calc R . . 
H14C H 0.0553 0.1565 0.5834 0.076 Uiso 1 1 calc R . . 
C15 C 0.1679(3) 0.2195(3) 0.6722(3) 0.0460(14) Uani 1 1 d . . . 
H15A H 0.1912 0.2237 0.7188 0.069 Uiso 1 1 calc R . . 
H15B H 0.1382 0.2415 0.6758 0.069 Uiso 1 1 calc R . . 
H15C H 0.2039 0.2436 0.6345 0.069 Uiso 1 1 calc R . . 
C16 C 0.1689(3) 0.1089(3) 0.6467(3) 0.0494(14) Uani 1 1 d . . . 
H16A H 0.1920 0.1129 0.6934 0.074 Uiso 1 1 calc R . . 
H16B H 0.2050 0.1340 0.6094 0.074 Uiso 1 1 calc R . . 
H16C H 0.1400 0.0588 0.6334 0.074 Uiso 1 1 calc R . . 
C17 C 0.5689(3) 0.1682(3) 0.8345(3) 0.0374(12) Uani 1 1 d . . . 
C18 C 0.5488(3) 0.2036(3) 0.8828(3) 0.0464(14) Uani 1 1 d . . . 
H18A H 0.5727 0.2540 0.8821 0.056 Uiso 1 1 calc R . . 
C19 C 0.4946(3) 0.1671(4) 0.9319(3) 0.0584(17) Uani 1 1 d . . . 
H19A H 0.4815 0.1924 0.9645 0.070 Uiso 1 1 calc R . . 
C20 C 0.4598(3) 0.0946(4) 0.9336(3) 0.0615(18) Uani 1 1 d . . . 
H20A H 0.4227 0.0696 0.9675 0.074 Uiso 1 1 calc R . . 
C21 C 0.4787(3) 0.0578(3) 0.8862(3) 0.0560(16) Uani 1 1 d . . . 
H21A H 0.4541 0.0074 0.8872 0.067 Uiso 1 1 calc R . . 
C22 C 0.5334(3) 0.0944(3) 0.8372(3) 0.0477(14) Uani 1 1 d . . . 
H22A H 0.5468 0.0689 0.8052 0.057 Uiso 1 1 calc R . . 
C23 C 0.6894(2) 0.1735(2) 0.7687(3) 0.0362(12) Uani 1 1 d . . . 
C24 C 0.7158(3) 0.1675(3) 0.8356(3) 0.0396(13) Uani 1 1 d . . . 
H24A H 0.7024 0.1822 0.8783 0.048 Uiso 1 1 calc R . . 
C25 C 0.7612(3) 0.1406(3) 0.8408(3) 0.0492(15) Uani 1 1 d . . . 
H25A H 0.7789 0.1371 0.8868 0.059 Uiso 1 1 calc R . . 
C26 C 0.7808(3) 0.1188(3) 0.7797(4) 0.0548(16) Uani 1 1 d . . . 
H26A H 0.8119 0.1002 0.7834 0.066 Uiso 1 1 calc R . . 
C27 C 0.7555(3) 0.1240(3) 0.7133(4) 0.0538(16) Uani 1 1 d . . . 
H27A H 0.7689 0.1086 0.6710 0.065 Uiso 1 1 calc R . . 
C28 C 0.7103(3) 0.1517(3) 0.7078(3) 0.0470(14) Uani 1 1 d . . . 
H28A H 0.6936 0.1558 0.6615 0.056 Uiso 1 1 calc R . . 
C29 C 0.5539(3) 0.1864(3) 0.6387(3) 0.0454(13) Uani 1 1 d . . . 
C30 C 0.4814(3) 0.1503(3) 0.6763(3) 0.0557(15) Uani 1 1 d . . . 
H30A H 0.4810 0.1193 0.7149 0.084 Uiso 1 1 calc R . . 
H30B H 0.4444 0.1221 0.6408 0.084 Uiso 1 1 calc R . . 
H30C H 0.4724 0.1866 0.6970 0.084 Uiso 1 1 calc R . . 
C31 C 0.5551(3) 0.2347(3) 0.5789(3) 0.0581(16) Uani 1 1 d . . . 
H31A H 0.6014 0.2572 0.5547 0.087 Uiso 1 1 calc R . . 
H31B H 0.5469 0.2714 0.5997 0.087 Uiso 1 1 calc R . . 
H31C H 0.5178 0.2068 0.5435 0.087 Uiso 1 1 calc R . . 
C32 C 0.5655(3) 0.1291(3) 0.6052(4) 0.0664(18) Uani 1 1 d . . . 
H32A H 0.6116 0.1512 0.5808 0.100 Uiso 1 1 calc R . . 
H32B H 0.5278 0.1019 0.5700 0.100 Uiso 1 1 calc R . . 
H32C H 0.5645 0.0973 0.6433 0.100 Uiso 1 1 calc R . . 
C33 C 0.6874(3) 0.5158(3) 0.2020(3) 0.0374(12) Uani 1 1 d . . . 
C34 C 0.6531(3) 0.5206(3) 0.1404(3) 0.0445(13) Uani 1 1 d . . . 
H34A H 0.6499 0.4937 0.0985 0.053 Uiso 1 1 calc R . . 
C35 C 0.6237(3) 0.5634(3) 0.1395(3) 0.0544(15) Uani 1 1 d . . . 
H35A H 0.5999 0.5658 0.0973 0.065 Uiso 1 1 calc R . . 
C36 C 0.6287(3) 0.6033(3) 0.1998(4) 0.0564(16) Uani 1 1 d . . . 
H36A H 0.6082 0.6330 0.1995 0.068 Uiso 1 1 calc R . . 
C37 C 0.6632(3) 0.5995(3) 0.2594(4) 0.0598(17) Uani 1 1 d . . . 
H37A H 0.6679 0.6280 0.3004 0.072 Uiso 1 1 calc R . . 
C38 C 0.6914(3) 0.5555(3) 0.2620(3) 0.0511(15) Uani 1 1 d . . . 
H38A H 0.7137 0.5524 0.3050 0.061 Uiso 1 1 calc R . . 
C39 C 0.7895(2) 0.4973(2) 0.1280(3) 0.0348(12) Uani 1 1 d . . . 
C40 C 0.7997(3) 0.4586(3) 0.0759(3) 0.0449(14) Uani 1 1 d . . . 
H40A H 0.7710 0.4084 0.0759 0.054 Uiso 1 1 calc R . . 
C41 C 0.8515(3) 0.4916(3) 0.0230(3) 0.0521(15) Uani 1 1 d . . . 
H41A H 0.8577 0.4641 -0.0130 0.063 Uiso 1 1 calc R . . 
C42 C 0.8934(3) 0.5639(3) 0.0227(3) 0.0525(15) Uani 1 1 d . . . 
H42A H 0.9291 0.5866 -0.0131 0.063 Uiso 1 1 calc R . . 
C43 C 0.8835(3) 0.6029(3) 0.0745(4) 0.0627(18) Uani 1 1 d . . . 
H43A H 0.9124 0.6531 0.0744 0.075 Uiso 1 1 calc R . . 
C44 C 0.8327(3) 0.5706(3) 0.1263(3) 0.0537(15) Uani 1 1 d . . . 
H44A H 0.8268 0.5987 0.1620 0.064 Uiso 1 1 calc R . . 
C45 C 0.8059(3) 0.4650(3) 0.3197(3) 0.0557(16) Uani 1 1 d . . . 
C46 C 0.7947(4) 0.4117(4) 0.3785(4) 0.091(2) Uani 1 1 d . . . 
H46A H 0.7516 0.3999 0.4058 0.136 Uiso 1 1 calc R . . 
H46B H 0.8355 0.4321 0.4114 0.136 Uiso 1 1 calc R . . 
H46C H 0.7897 0.3685 0.3563 0.136 Uiso 1 1 calc R . . 
C47 C 0.8162(4) 0.5323(4) 0.3529(5) 0.102(3) Uani 1 1 d . . . 
H47A H 0.7739 0.5224 0.3807 0.152 Uiso 1 1 calc R . . 
H47B H 0.8240 0.5666 0.3145 0.152 Uiso 1 1 calc R . . 
H47C H 0.8575 0.5521 0.3851 0.152 Uiso 1 1 calc R . . 
C48 C 0.8739(3) 0.4826(4) 0.2775(4) 0.073(2) Uani 1 1 d . . . 
H48A H 0.8818 0.5170 0.2392 0.110 Uiso 1 1 calc R . . 
H48B H 0.8688 0.4392 0.2558 0.110 Uiso 1 1 calc R . . 
H48C H 0.9145 0.5029 0.3107 0.110 Uiso 1 1 calc R . . 
C49 C 0.7452(3) 0.6544(4) 0.4996(4) 0.118(3) Uiso 1 1 d G . . 
C50 C 0.7447(4) 0.7129(3) 0.5290(4) 0.114(3) Uiso 1 1 d G . . 
H50A H 0.7857 0.7490 0.5526 0.137 Uiso 1 1 calc R . . 
C51 C 0.6840(5) 0.7187(4) 0.5239(4) 0.186(6) Uiso 1 1 d G . . 
H51A H 0.6836 0.7586 0.5440 0.224 Uiso 1 1 calc R . . 
C52 C 0.6240(4) 0.6659(5) 0.4894(5) 0.182(5) Uiso 1 1 d G . . 
H52A H 0.5825 0.6698 0.4860 0.218 Uiso 1 1 calc R . . 
C53 C 0.6245(3) 0.6074(4) 0.4601(4) 0.152(4) Uiso 1 1 d G . . 
H53A H 0.5835 0.5713 0.4365 0.183 Uiso 1 1 calc R . . 
C54 C 0.6852(4) 0.6017(3) 0.4652(4) 0.111(3) Uiso 1 1 d G . . 
H54A H 0.6856 0.5617 0.4451 0.133 Uiso 1 1 calc R . . 
C55 C 0.8098(8) 0.6517(8) 0.5051(8) 0.199(6) Uiso 1 1 d . . . 
H55A H 0.8459 0.6942 0.5303 0.298 Uiso 1 1 calc R . . 
H55B H 0.8268 0.6498 0.4564 0.298 Uiso 1 1 calc R . . 
H55C H 0.8008 0.6094 0.5323 0.298 Uiso 1 1 calc R . . 
  
loop_ 
 _atom_site_aniso_label 
 _atom_site_aniso_U_11 
 _atom_site_aniso_U_22 
 _atom_site_aniso_U_33 
 _atom_site_aniso_U_23 
 _atom_site_aniso_U_13 
 _atom_site_aniso_U_12 
Cr1 0.0263(4) 0.0263(4) 0.0254(7) 0.000 0.000 0.0132(2) 
Cr2 0.0293(5) 0.0293(5) 0.0314(8) 0.000 0.000 0.0147(2) 
Cr3 0.0300(5) 0.0300(5) 0.0334(8) 0.000 0.000 0.0150(2) 
N1 0.032(2) 0.028(2) 0.030(2) -0.0004(17) -0.0016(17) 0.0116(18) 
N2 0.035(2) 0.032(2) 0.034(2) -0.0014(18) -0.0011(18) 0.0139(19) 
N3 0.040(2) 0.035(2) 0.035(3) -0.0045(19) -0.0074(19) 0.014(2) 
P1 0.0311(7) 0.0291(7) 0.0260(7) -0.0007(5) -0.0019(5) 0.0150(6) 
P2 0.0330(7) 0.0304(7) 0.0372(8) 0.0006(6) 0.0033(6) 0.0161(6) 
P3 0.0316(7) 0.0276(7) 0.0404(8) -0.0033(6) -0.0016(6) 0.0138(6) 
C1 0.034(3) 0.039(3) 0.026(3) -0.002(2) -0.001(2) 0.019(2) 
C2 0.059(4) 0.048(3) 0.048(4) -0.015(3) -0.015(3) 0.036(3) 
C3 0.092(5) 0.097(6) 0.043(4) -0.024(4) -0.029(3) 0.074(5) 
C4 0.044(3) 0.087(5) 0.051(4) -0.027(4) -0.019(3) 0.038(4) 
C5 0.047(4) 0.052(4) 0.051(4) -0.011(3) -0.003(3) 0.011(3) 
C6 0.046(3) 0.042(3) 0.036(3) -0.001(2) -0.007(3) 0.011(3) 
C7 0.035(3) 0.033(3) 0.031(3) -0.007(2) -0.010(2) 0.014(2) 
C8 0.044(3) 0.040(3) 0.039(3) -0.004(2) -0.003(2) 0.023(3) 
C9 0.056(4) 0.055(4) 0.052(4) -0.014(3) -0.009(3) 0.039(3) 
C10 0.075(4) 0.058(4) 0.064(4) -0.020(3) -0.019(3) 0.047(4) 
C11 0.078(4) 0.057(4) 0.050(4) -0.003(3) -0.017(3) 0.047(4) 
C12 0.058(4) 0.052(3) 0.038(3) -0.003(3) -0.006(3) 0.037(3) 
C13 0.037(3) 0.035(3) 0.029(3) 0.005(2) 0.003(2) 0.015(2) 
C14 0.048(3) 0.058(4) 0.035(3) 0.007(3) 0.007(3) 0.018(3) 
C15 0.052(3) 0.035(3) 0.037(3) 0.010(2) 0.008(3) 0.011(3) 
C16 0.038(3) 0.048(3) 0.059(4) 0.005(3) 0.013(3) 0.019(3) 
C17 0.034(3) 0.046(3) 0.037(3) 0.004(2) 0.000(2) 0.024(3) 
C18 0.053(3) 0.055(3) 0.043(3) 0.012(3) 0.006(3) 0.035(3) 
C19 0.068(4) 0.084(5) 0.050(4) 0.022(3) 0.014(3) 0.058(4) 
C20 0.042(3) 0.094(5) 0.051(4) 0.030(4) 0.012(3) 0.036(4) 
C21 0.036(3) 0.048(4) 0.066(4) 0.022(3) 0.004(3) 0.007(3) 
C22 0.039(3) 0.044(3) 0.056(4) 0.007(3) 0.003(3) 0.018(3) 
C23 0.030(3) 0.028(3) 0.043(3) 0.004(2) 0.009(2) 0.009(2) 
C24 0.034(3) 0.033(3) 0.050(4) -0.004(2) 0.001(2) 0.016(2) 
C25 0.043(3) 0.040(3) 0.067(4) -0.002(3) -0.009(3) 0.022(3) 
C26 0.043(3) 0.046(3) 0.084(5) 0.000(3) 0.002(3) 0.029(3) 
C27 0.059(4) 0.044(3) 0.068(4) 0.001(3) 0.018(3) 0.033(3) 
C28 0.044(3) 0.042(3) 0.056(4) 0.008(3) 0.011(3) 0.022(3) 
C29 0.043(3) 0.041(3) 0.045(3) -0.009(3) -0.005(3) 0.016(3) 
C30 0.042(3) 0.054(4) 0.059(4) -0.007(3) -0.007(3) 0.015(3) 
C31 0.058(4) 0.066(4) 0.040(4) -0.005(3) -0.012(3) 0.023(3) 
C32 0.065(4) 0.063(4) 0.070(5) -0.031(3) -0.020(3) 0.031(3) 
C33 0.034(3) 0.032(3) 0.041(3) 0.001(2) 0.001(2) 0.013(2) 
C34 0.047(3) 0.041(3) 0.049(4) 0.002(3) 0.006(3) 0.025(3) 
C35 0.055(4) 0.060(4) 0.059(4) 0.008(3) -0.001(3) 0.036(3) 
C36 0.049(4) 0.046(4) 0.085(5) 0.005(3) 0.008(3) 0.032(3) 
C37 0.059(4) 0.044(4) 0.083(5) -0.014(3) -0.004(4) 0.032(3) 
C38 0.058(4) 0.051(4) 0.051(4) -0.008(3) -0.007(3) 0.033(3) 
C39 0.034(3) 0.029(3) 0.042(3) -0.007(2) -0.005(2) 0.017(2) 
C40 0.045(3) 0.030(3) 0.063(4) 0.001(3) 0.000(3) 0.022(3) 
C41 0.063(4) 0.063(4) 0.045(4) 0.003(3) 0.011(3) 0.042(4) 
C42 0.039(3) 0.057(4) 0.053(4) 0.006(3) 0.011(3) 0.018(3) 
C43 0.045(4) 0.039(3) 0.079(5) 0.003(3) 0.019(3) 0.002(3) 
C44 0.054(4) 0.034(3) 0.062(4) -0.009(3) 0.014(3) 0.014(3) 
C45 0.053(4) 0.056(4) 0.057(4) -0.019(3) -0.024(3) 0.027(3) 
C46 0.099(6) 0.113(6) 0.060(5) -0.009(4) -0.033(4) 0.053(5) 
C47 0.101(6) 0.104(6) 0.126(7) -0.076(5) -0.075(5) 0.070(5) 
C48 0.048(4) 0.072(5) 0.099(6) -0.018(4) -0.023(4) 0.029(4) 
  
_geom_special_details 
; 
 All esds (except the esd in the dihedral angle between two l.s. planes) 
 are estimated using the full covariance matrix.  The cell esds are taken 
 into account individually in the estimation of esds in distances, angles 
 and torsion angles; correlations between esds in cell parameters are only 
 used when they are defined by crystal symmetry.  An approximate (isotropic) 
 treatment of cell esds is used for estimating esds involving l.s. planes. 
; 
  
loop_ 
 _geom_bond_atom_site_label_1 
 _geom_bond_atom_site_label_2 
 _geom_bond_distance 
 _geom_bond_site_symmetry_2 
 _geom_bond_publ_flag 
Cr1 N1 2.023(4) 3 ? 
Cr1 N1 2.023(4) . ? 
Cr1 N1 2.023(4) 2 ? 
Cr1 P1 2.4148(13) 2 ? 
Cr1 P1 2.4148(13) 3 ? 
Cr1 P1 2.4148(13) . ? 
Cr2 N2 2.034(4) 2_655 ? 
Cr2 N2 2.034(4) 3_665 ? 
Cr2 N2 2.034(4) . ? 
Cr2 P2 2.3730(14) 2_655 ? 
Cr2 P2 2.3730(13) 3_665 ? 
Cr2 P2 2.3730(14) . ? 
Cr3 N3 2.039(4) 2_655 ? 
Cr3 N3 2.039(4) . ? 
Cr3 N3 2.039(4) 3_665 ? 
Cr3 P3 2.3771(13) . ? 
Cr3 P3 2.3771(14) 3_665 ? 
Cr3 P3 2.3771(14) 2_655 ? 
N1 C13 1.493(6) . ? 
N1 P1 1.615(4) . ? 
N2 C29 1.476(6) . ? 
N2 P2 1.622(4) . ? 
N3 C45 1.479(7) . ? 
N3 P3 1.625(4) . ? 
P1 C7 1.836(5) . ? 
P1 C1 1.844(5) . ? 
P2 C17 1.836(5) . ? 
P2 C23 1.831(5) . ? 
P3 C33 1.835(5) . ? 
P3 C39 1.837(5) . ? 
C1 C6 1.384(7) . ? 
C1 C2 1.376(7) . ? 
C2 C3 1.385(8) . ? 
C3 C4 1.362(9) . ? 
C4 C5 1.365(9) . ? 
C5 C6 1.387(8) . ? 
C7 C12 1.381(7) . ? 
C7 C8 1.406(7) . ? 
C8 C9 1.372(7) . ? 
C9 C10 1.372(8) . ? 
C10 C11 1.368(8) . ? 
C11 C12 1.384(7) . ? 
C13 C16 1.514(7) . ? 
C13 C15 1.520(7) . ? 
C13 C14 1.534(7) . ? 
C17 C18 1.385(7) . ? 
C17 C22 1.393(7) . ? 
C18 C19 1.382(8) . ? 
C19 C20 1.367(9) . ? 
C20 C21 1.380(9) . ? 
C21 C22 1.388(8) . ? 
C23 C28 1.382(7) . ? 
C23 C24 1.395(7) . ? 
C24 C25 1.381(7) . ? 
C25 C26 1.370(8) . ? 
C26 C27 1.370(8) . ? 
C27 C28 1.392(8) . ? 
C29 C32 1.521(8) . ? 
C29 C31 1.518(8) . ? 
C29 C30 1.533(8) . ? 
C33 C38 1.381(7) . ? 
C33 C34 1.392(7) . ? 
C34 C35 1.370(7) . ? 
C35 C36 1.382(8) . ? 
C36 C37 1.359(9) . ? 
C37 C38 1.374(8) . ? 
C39 C40 1.369(7) . ? 
C39 C44 1.390(7) . ? 
C40 C41 1.388(8) . ? 
C41 C42 1.367(8) . ? 
C42 C43 1.365(8) . ? 
C43 C44 1.362(8) . ? 
C45 C46 1.518(9) . ? 
C45 C47 1.498(8) . ? 
C45 C48 1.543(9) . ? 
C49 C50 1.3900 . ? 
C49 C54 1.3900 . ? 
C49 C55 1.440(14) . ? 
C50 C51 1.3900 . ? 
C51 C52 1.3900 . ? 
C52 C53 1.3900 . ? 
C53 C54 1.3900 . ? 
  
loop_ 
 _geom_angle_atom_site_label_1 
 _geom_angle_atom_site_label_2 
 _geom_angle_atom_site_label_3 
 _geom_angle 
 _geom_angle_site_symmetry_1 
 _geom_angle_site_symmetry_3 
 _geom_angle_publ_flag 
N1 Cr1 N1 111.67(10) 3 . ? 
N1 Cr1 N1 111.67(10) 3 2 ? 
N1 Cr1 N1 111.67(10) . 2 ? 
N1 Cr1 P1 105.82(11) 3 2 ? 
N1 Cr1 P1 141.09(11) . 2 ? 
N1 Cr1 P1 41.53(11) 2 2 ? 
N1 Cr1 P1 41.53(11) 3 3 ? 
N1 Cr1 P1 105.82(11) . 3 ? 
N1 Cr1 P1 141.09(11) 2 3 ? 
P1 Cr1 P1 108.99(4) 2 3 ? 
N1 Cr1 P1 141.09(11) 3 . ? 
N1 Cr1 P1 41.52(11) . . ? 
N1 Cr1 P1 105.82(11) 2 . ? 
P1 Cr1 P1 108.99(4) 2 . ? 
P1 Cr1 P1 108.99(4) 3 . ? 
N2 Cr2 N2 110.45(11) 2_655 3_665 ? 
N2 Cr2 N2 110.45(11) 2_655 . ? 
N2 Cr2 N2 110.45(11) 3_665 . ? 
N2 Cr2 P2 42.31(12) 2_655 2_655 ? 
N2 Cr2 P2 106.47(11) 3_665 2_655 ? 
N2 Cr2 P2 140.95(11) . 2_655 ? 
N2 Cr2 P2 140.95(11) 2_655 3_665 ? 
N2 Cr2 P2 42.31(12) 3_665 3_665 ? 
N2 Cr2 P2 106.47(11) . 3_665 ? 
P2 Cr2 P2 109.24(4) 2_655 3_665 ? 
N2 Cr2 P2 106.47(11) 2_655 . ? 
N2 Cr2 P2 140.95(11) 3_665 . ? 
N2 Cr2 P2 42.31(12) . . ? 
P2 Cr2 P2 109.24(4) 2_655 . ? 
P2 Cr2 P2 109.24(4) 3_665 . ? 
N3 Cr3 N3 110.83(11) 2_655 . ? 
N3 Cr3 N3 110.83(11) 2_655 3_665 ? 
N3 Cr3 N3 110.83(11) . 3_665 ? 
N3 Cr3 P3 103.35(12) 2_655 . ? 
N3 Cr3 P3 42.33(12) . . ? 
N3 Cr3 P3 143.58(12) 3_665 . ? 
N3 Cr3 P3 143.58(12) 2_655 3_665 ? 
N3 Cr3 P3 103.35(12) . 3_665 ? 
N3 Cr3 P3 42.33(12) 3_665 3_665 ? 
P3 Cr3 P3 110.36(4) . 3_665 ? 
N3 Cr3 P3 42.33(12) 2_655 2_655 ? 
N3 Cr3 P3 143.58(12) . 2_655 ? 
N3 Cr3 P3 103.35(12) 3_665 2_655 ? 
P3 Cr3 P3 110.36(4) . 2_655 ? 
P3 Cr3 P3 110.36(4) 3_665 2_655 ? 
C13 N1 P1 135.6(3) . . ? 
C13 N1 Cr1 140.4(3) . . ? 
P1 N1 Cr1 82.35(16) . . ? 
C29 N2 P2 135.5(3) . . ? 
C29 N2 Cr2 139.7(3) . . ? 
P2 N2 Cr2 80.08(17) . . ? 
C45 N3 P3 135.3(4) . . ? 
C45 N3 Cr3 140.7(4) . . ? 
P3 N3 Cr3 80.00(17) . . ? 
N1 P1 C7 116.8(2) . . ? 
N1 P1 C1 116.3(2) . . ? 
C7 P1 C1 99.5(2) . . ? 
N1 P1 Cr1 56.12(14) . . ? 
C7 P1 Cr1 134.32(15) . . ? 
C1 P1 Cr1 124.74(16) . . ? 
N2 P2 C17 116.4(2) . . ? 
N2 P2 C23 117.1(2) . . ? 
C17 P2 C23 101.5(2) . . ? 
N2 P2 Cr2 57.61(14) . . ? 
C17 P2 Cr2 124.58(17) . . ? 
C23 P2 Cr2 131.53(16) . . ? 
N3 P3 C33 117.4(2) . . ? 
N3 P3 C39 116.6(2) . . ? 
C33 P3 C39 99.5(2) . . ? 
N3 P3 Cr3 57.66(14) . . ? 
C33 P3 Cr3 129.95(16) . . ? 
C39 P3 Cr3 128.35(16) . . ? 
C6 C1 C2 117.8(5) . . ? 
C6 C1 P1 122.8(4) . . ? 
C2 C1 P1 119.4(4) . . ? 
C3 C2 C1 121.3(5) . . ? 
C4 C3 C2 119.9(6) . . ? 
C3 C4 C5 120.1(5) . . ? 
C4 C5 C6 120.0(6) . . ? 
C1 C6 C5 120.8(5) . . ? 
C12 C7 C8 118.0(5) . . ? 
C12 C7 P1 124.9(4) . . ? 
C8 C7 P1 117.0(4) . . ? 
C9 C8 C7 120.6(5) . . ? 
C10 C9 C8 120.4(5) . . ? 
C11 C10 C9 119.7(5) . . ? 
C10 C11 C12 120.7(5) . . ? 
C7 C12 C11 120.5(5) . . ? 
N1 C13 C16 108.4(4) . . ? 
N1 C13 C15 112.8(4) . . ? 
C16 C13 C15 108.6(4) . . ? 
N1 C13 C14 108.0(4) . . ? 
C16 C13 C14 109.3(4) . . ? 
C15 C13 C14 109.6(4) . . ? 
C18 C17 C22 118.2(5) . . ? 
C18 C17 P2 119.2(4) . . ? 
C22 C17 P2 122.6(4) . . ? 
C19 C18 C17 121.3(6) . . ? 
C18 C19 C20 120.0(6) . . ? 
C21 C20 C19 120.2(6) . . ? 
C20 C21 C22 120.0(6) . . ? 
C21 C22 C17 120.4(5) . . ? 
C28 C23 C24 117.7(5) . . ? 
C28 C23 P2 124.9(4) . . ? 
C24 C23 P2 117.0(4) . . ? 
C25 C24 C23 121.2(5) . . ? 
C24 C25 C26 120.1(6) . . ? 
C25 C26 C27 120.0(5) . . ? 
C26 C27 C28 120.0(5) . . ? 
C23 C28 C27 121.0(6) . . ? 
N2 C29 C32 111.2(4) . . ? 
N2 C29 C31 106.9(4) . . ? 
C32 C29 C31 108.7(5) . . ? 
N2 C29 C30 111.9(4) . . ? 
C32 C29 C30 108.3(5) . . ? 
C31 C29 C30 109.8(5) . . ? 
C38 C33 C34 118.4(5) . . ? 
C38 C33 P3 125.8(4) . . ? 
C34 C33 P3 115.7(4) . . ? 
C35 C34 C33 120.8(5) . . ? 
C34 C35 C36 120.1(6) . . ? 
C37 C36 C35 119.1(5) . . ? 
C36 C37 C38 121.6(6) . . ? 
C37 C38 C33 119.9(6) . . ? 
C40 C39 C44 117.8(5) . . ? 
C40 C39 P3 120.2(4) . . ? 
C44 C39 P3 122.0(4) . . ? 
C39 C40 C41 120.9(5) . . ? 
C42 C41 C40 120.1(5) . . ? 
C43 C42 C41 119.3(5) . . ? 
C42 C43 C44 120.7(5) . . ? 
C43 C44 C39 121.1(5) . . ? 
N3 C45 C46 106.9(5) . . ? 
N3 C45 C47 112.3(5) . . ? 
C46 C45 C47 110.2(6) . . ? 
N3 C45 C48 110.9(5) . . ? 
C46 C45 C48 108.6(6) . . ? 
C47 C45 C48 107.9(6) . . ? 
C50 C49 C54 120.0 . . ? 
C50 C49 C55 117.8(8) . . ? 
C54 C49 C55 122.2(8) . . ? 
C49 C50 C51 120.0 . . ? 
C52 C51 C50 120.0 . . ? 
C53 C52 C51 120.0 . . ? 
C52 C53 C54 120.0 . . ? 
C53 C54 C49 120.0 . . ? 
  
loop_ 
 _geom_torsion_atom_site_label_1 
 _geom_torsion_atom_site_label_2 
 _geom_torsion_atom_site_label_3 
 _geom_torsion_atom_site_label_4 
 _geom_torsion 
 _geom_torsion_site_symmetry_1 
 _geom_torsion_site_symmetry_2 
 _geom_torsion_site_symmetry_3 
 _geom_torsion_site_symmetry_4 
 _geom_torsion_publ_flag 
N1 Cr1 N1 C13 21.2(5) 3 . . . ? 
N1 Cr1 N1 C13 -104.7(4) 2 . . . ? 
P1 Cr1 N1 C13 -142.4(4) 2 . . . ? 
P1 Cr1 N1 C13 64.7(5) 3 . . . ? 
P1 Cr1 N1 C13 165.7(6) . . . . ? 
N1 Cr1 N1 P1 -144.52(18) 3 . . . ? 
N1 Cr1 N1 P1 89.6(2) 2 . . . ? 
P1 Cr1 N1 P1 51.9(2) 2 . . . ? 
P1 Cr1 N1 P1 -100.97(14) 3 . . . ? 
N2 Cr2 N2 C29 -111.7(4) 2_655 . . . ? 
N2 Cr2 N2 C29 10.7(6) 3_665 . . . ? 
P2 Cr2 N2 C29 -149.2(4) 2_655 . . . ? 
P2 Cr2 N2 C29 55.3(5) 3_665 . . . ? 
P2 Cr2 N2 C29 156.0(6) . . . . ? 
N2 Cr2 N2 P2 92.3(2) 2_655 . . . ? 
N2 Cr2 N2 P2 -145.25(18) 3_665 . . . ? 
P2 Cr2 N2 P2 54.8(2) 2_655 . . . ? 
P2 Cr2 N2 P2 -100.70(14) 3_665 . . . ? 
N3 Cr3 N3 C45 115.4(5) 2_655 . . . ? 
N3 Cr3 N3 C45 -8.1(7) 3_665 . . . ? 
P3 Cr3 N3 C45 -157.5(7) . . . . ? 
P3 Cr3 N3 C45 -51.8(6) 3_665 . . . ? 
P3 Cr3 N3 C45 150.6(5) 2_655 . . . ? 
N3 Cr3 N3 P3 -87.1(3) 2_655 . . . ? 
N3 Cr3 N3 P3 149.42(18) 3_665 . . . ? 
P3 Cr3 N3 P3 105.69(15) 3_665 . . . ? 
P3 Cr3 N3 P3 -51.8(3) 2_655 . . . ? 
C13 N1 P1 C7 65.9(5) . . . . ? 
Cr1 N1 P1 C7 -127.14(19) . . . . ? 
C13 N1 P1 C1 -51.3(5) . . . . ? 
Cr1 N1 P1 C1 115.7(2) . . . . ? 
C13 N1 P1 Cr1 -167.0(5) . . . . ? 
N1 Cr1 P1 N1 59.18(18) 3 . . . ? 
N1 Cr1 P1 N1 -105.0(2) 2 . . . ? 
P1 Cr1 P1 N1 -148.50(17) 2 . . . ? 
P1 Cr1 P1 N1 92.65(17) 3 . . . ? 
N1 Cr1 P1 C7 155.1(3) 3 . . . ? 
N1 Cr1 P1 C7 95.9(3) . . . . ? 
N1 Cr1 P1 C7 -9.1(3) 2 . . . ? 
P1 Cr1 P1 C7 -52.6(3) 2 . . . ? 
P1 Cr1 P1 C7 -171.5(2) 3 . . . ? 
N1 Cr1 P1 C1 -41.4(3) 3 . . . ? 
N1 Cr1 P1 C1 -100.5(2) . . . . ? 
N1 Cr1 P1 C1 154.5(2) 2 . . . ? 
P1 Cr1 P1 C1 110.97(18) 2 . . . ? 
P1 Cr1 P1 C1 -7.9(2) 3 . . . ? 
C29 N2 P2 C17 -42.1(6) . . . . ? 
Cr2 N2 P2 C17 115.8(2) . . . . ? 
C29 N2 P2 C23 78.2(5) . . . . ? 
Cr2 N2 P2 C23 -123.86(19) . . . . ? 
C29 N2 P2 Cr2 -157.9(5) . . . . ? 
N2 Cr2 P2 N2 -102.5(2) 2_655 . . . ? 
N2 Cr2 P2 N2 57.97(19) 3_665 . . . ? 
P2 Cr2 P2 N2 -146.97(17) 2_655 . . . ? 
P2 Cr2 P2 N2 93.59(18) 3_665 . . . ? 
N2 Cr2 P2 C17 155.8(2) 2_655 . . . ? 
N2 Cr2 P2 C17 -43.7(3) 3_665 . . . ? 
N2 Cr2 P2 C17 -101.7(3) . . . . ? 
P2 Cr2 P2 C17 111.31(19) 2_655 . . . ? 
P2 Cr2 P2 C17 -8.1(2) 3_665 . . . ? 
N2 Cr2 P2 C23 -3.3(3) 2_655 . . . ? 
N2 Cr2 P2 C23 157.2(3) 3_665 . . . ? 
N2 Cr2 P2 C23 99.2(3) . . . . ? 
P2 Cr2 P2 C23 -47.8(3) 2_655 . . . ? 
P2 Cr2 P2 C23 -167.2(2) 3_665 . . . ? 
C45 N3 P3 C33 -78.3(6) . . . . ? 
Cr3 N3 P3 C33 121.9(2) . . . . ? 
C45 N3 P3 C39 39.6(6) . . . . ? 
Cr3 N3 P3 C39 -120.27(19) . . . . ? 
C45 N3 P3 Cr3 159.9(6) . . . . ? 
N3 Cr3 P3 N3 106.4(2) 2_655 . . . ? 
N3 Cr3 P3 N3 -53.23(19) 3_665 . . . ? 
P3 Cr3 P3 N3 -87.62(19) 3_665 . . . ? 
P3 Cr3 P3 N3 150.14(19) 2_655 . . . ? 
N3 Cr3 P3 C33 6.0(3) 2_655 . . . ? 
N3 Cr3 P3 C33 -100.4(3) . . . . ? 
N3 Cr3 P3 C33 -153.6(3) 3_665 . . . ? 
P3 Cr3 P3 C33 172.0(2) 3_665 . . . ? 
P3 Cr3 P3 C33 49.8(2) 2_655 . . . ? 
N3 Cr3 P3 C39 -153.5(2) 2_655 . . . ? 
N3 Cr3 P3 C39 100.1(3) . . . . ? 
N3 Cr3 P3 C39 46.9(3) 3_665 . . . ? 
P3 Cr3 P3 C39 12.5(2) 3_665 . . . ? 
P3 Cr3 P3 C39 -109.74(19) 2_655 . . . ? 
N1 P1 C1 C6 92.4(5) . . . . ? 
C7 P1 C1 C6 -33.9(5) . . . . ? 
Cr1 P1 C1 C6 157.9(4) . . . . ? 
N1 P1 C1 C2 -87.8(4) . . . . ? 
C7 P1 C1 C2 145.9(4) . . . . ? 
Cr1 P1 C1 C2 -22.3(5) . . . . ? 
C6 C1 C2 C3 -1.6(8) . . . . ? 
P1 C1 C2 C3 178.6(5) . . . . ? 
C1 C2 C3 C4 0.7(9) . . . . ? 
C2 C3 C4 C5 0.3(9) . . . . ? 
C3 C4 C5 C6 -0.4(9) . . . . ? 
C2 C1 C6 C5 1.4(8) . . . . ? 
P1 C1 C6 C5 -178.7(4) . . . . ? 
C4 C5 C6 C1 -0.5(9) . . . . ? 
N1 P1 C7 C12 -5.2(5) . . . . ? 
C1 P1 C7 C12 120.8(5) . . . . ? 
Cr1 P1 C7 C12 -72.9(5) . . . . ? 
N1 P1 C7 C8 172.9(3) . . . . ? 
C1 P1 C7 C8 -61.1(4) . . . . ? 
Cr1 P1 C7 C8 105.3(4) . . . . ? 
C12 C7 C8 C9 -0.8(7) . . . . ? 
P1 C7 C8 C9 -179.1(4) . . . . ? 
C7 C8 C9 C10 0.2(8) . . . . ? 
C8 C9 C10 C11 -0.1(9) . . . . ? 
C9 C10 C11 C12 0.7(9) . . . . ? 
C8 C7 C12 C11 1.5(8) . . . . ? 
P1 C7 C12 C11 179.6(4) . . . . ? 
C10 C11 C12 C7 -1.4(9) . . . . ? 
P1 N1 C13 C16 118.2(5) . . . . ? 
Cr1 N1 C13 C16 -41.4(6) . . . . ? 
P1 N1 C13 C15 -2.1(7) . . . . ? 
Cr1 N1 C13 C15 -161.7(4) . . . . ? 
P1 N1 C13 C14 -123.5(5) . . . . ? 
Cr1 N1 C13 C14 77.0(6) . . . . ? 
N2 P2 C17 C18 -92.4(4) . . . . ? 
C23 P2 C17 C18 139.2(4) . . . . ? 
Cr2 P2 C17 C18 -25.0(5) . . . . ? 
N2 P2 C17 C22 85.1(5) . . . . ? 
C23 P2 C17 C22 -43.3(5) . . . . ? 
Cr2 P2 C17 C22 152.5(4) . . . . ? 
C22 C17 C18 C19 -0.6(8) . . . . ? 
P2 C17 C18 C19 177.0(4) . . . . ? 
C17 C18 C19 C20 0.2(9) . . . . ? 
C18 C19 C20 C21 -0.2(9) . . . . ? 
C19 C20 C21 C22 0.7(9) . . . . ? 
C20 C21 C22 C17 -1.1(8) . . . . ? 
C18 C17 C22 C21 1.1(8) . . . . ? 
P2 C17 C22 C21 -176.4(4) . . . . ? 
N2 P2 C23 C28 3.9(5) . . . . ? 
C17 P2 C23 C28 131.8(4) . . . . ? 
Cr2 P2 C23 C28 -65.6(5) . . . . ? 
N2 P2 C23 C24 176.2(3) . . . . ? 
C17 P2 C23 C24 -55.8(4) . . . . ? 
Cr2 P2 C23 C24 106.7(4) . . . . ? 
C28 C23 C24 C25 -0.1(7) . . . . ? 
P2 C23 C24 C25 -173.0(4) . . . . ? 
C23 C24 C25 C26 -0.4(8) . . . . ? 
C24 C25 C26 C27 0.2(8) . . . . ? 
C25 C26 C27 C28 0.4(9) . . . . ? 
C24 C23 C28 C27 0.7(7) . . . . ? 
P2 C23 C28 C27 173.0(4) . . . . ? 
C26 C27 C28 C23 -0.9(8) . . . . ? 
P2 N2 C29 C32 -68.4(7) . . . . ? 
Cr2 N2 C29 C32 146.5(5) . . . . ? 
P2 N2 C29 C31 173.2(4) . . . . ? 
Cr2 N2 C29 C31 28.0(7) . . . . ? 
P2 N2 C29 C30 52.9(7) . . . . ? 
Cr2 N2 C29 C30 -92.2(6) . . . . ? 
N3 P3 C33 C38 11.0(6) . . . . ? 
C39 P3 C33 C38 -115.7(5) . . . . ? 
Cr3 P3 C33 C38 80.4(5) . . . . ? 
N3 P3 C33 C34 -165.8(4) . . . . ? 
C39 P3 C33 C34 67.4(4) . . . . ? 
Cr3 P3 C33 C34 -96.4(4) . . . . ? 
C38 C33 C34 C35 -0.2(8) . . . . ? 
P3 C33 C34 C35 176.9(4) . . . . ? 
C33 C34 C35 C36 0.8(8) . . . . ? 
C34 C35 C36 C37 0.3(9) . . . . ? 
C35 C36 C37 C38 -1.9(9) . . . . ? 
C36 C37 C38 C33 2.5(9) . . . . ? 
C34 C33 C38 C37 -1.4(8) . . . . ? 
P3 C33 C38 C37 -178.1(4) . . . . ? 
N3 P3 C39 C40 92.0(4) . . . . ? 
C33 P3 C39 C40 -140.7(4) . . . . ? 
Cr3 P3 C39 C40 23.5(5) . . . . ? 
N3 P3 C39 C44 -88.6(5) . . . . ? 
C33 P3 C39 C44 38.7(5) . . . . ? 
Cr3 P3 C39 C44 -157.1(4) . . . . ? 
C44 C39 C40 C41 -0.3(8) . . . . ? 
P3 C39 C40 C41 179.1(4) . . . . ? 
C39 C40 C41 C42 0.5(8) . . . . ? 
C40 C41 C42 C43 -0.4(9) . . . . ? 
C41 C42 C43 C44 0.3(10) . . . . ? 
C42 C43 C44 C39 -0.2(10) . . . . ? 
C40 C39 C44 C43 0.2(9) . . . . ? 
P3 C39 C44 C43 -179.2(5) . . . . ? 
P3 N3 C45 C46 -175.1(5) . . . . ? 
Cr3 N3 C45 C46 -27.5(8) . . . . ? 
P3 N3 C45 C47 63.9(8) . . . . ? 
Cr3 N3 C45 C47 -148.5(6) . . . . ? 
P3 N3 C45 C48 -56.9(7) . . . . ? 
Cr3 N3 C45 C48 90.7(7) . . . . ? 
C54 C49 C50 C51 0.0 . . . . ? 
C55 C49 C50 C51 178.8(9) . . . . ? 
C49 C50 C51 C52 0.0 . . . . ? 
C50 C51 C52 C53 0.0 . . . . ? 
C51 C52 C53 C54 0.0 . . . . ? 
C52 C53 C54 C49 0.0 . . . . ? 
C50 C49 C54 C53 0.0 . . . . ? 
C55 C49 C54 C53 -178.7(9) . . . . ? 
  
_diffrn_measured_fraction_theta_max    0.992 
_diffrn_reflns_theta_full              22.72 
_diffrn_measured_fraction_theta_full   0.992 
_refine_diff_density_max    0.610 
_refine_diff_density_min   -0.451 
_refine_diff_density_rms    0.070 
									#===END

Data Complex 8


_audit_creation_method            SHELXL-97 
_chemical_name_systematic 
; 
 ? 
; 
_chemical_name_common             ? 
_chemical_melting_point           ? 
_chemical_formula_moiety          ? 
_chemical_formula_sum 
 'C39.50 H52 Al2 Cl4 Cr N2 P2' 
_chemical_formula_weight          864.53 
  
loop_ 
 _atom_type_symbol 
 _atom_type_description 
 _atom_type_scat_dispersion_real 
 _atom_type_scat_dispersion_imag 
 _atom_type_scat_source 
 'C'  'C'   0.0033   0.0016 
 'International Tables Vol C Tables 4.2.6.8 and 6.1.1.4' 
 'H'  'H'   0.0000   0.0000 
 'International Tables Vol C Tables 4.2.6.8 and 6.1.1.4' 
 'N'  'N'   0.0061   0.0033 
 'International Tables Vol C Tables 4.2.6.8 and 6.1.1.4' 
 'P'  'P'   0.1023   0.0942 
 'International Tables Vol C Tables 4.2.6.8 and 6.1.1.4' 
 'Cl'  'Cl'   0.1484   0.1585 
 'International Tables Vol C Tables 4.2.6.8 and 6.1.1.4' 
 'Al'  'Al'   0.0645   0.0514 
 'International Tables Vol C Tables 4.2.6.8 and 6.1.1.4' 
 'Cr'  'Cr'   0.3209   0.6236 
 'International Tables Vol C Tables 4.2.6.8 and 6.1.1.4' 
  
_symmetry_cell_setting            Triclinic 
_symmetry_space_group_name_H-M    P-1 
  
loop_ 
 _symmetry_equiv_pos_as_xyz 
 'x, y, z' 
 '-x, -y, -z' 
  
_cell_length_a                    9.790(9) 
_cell_length_b                    11.692(9) 
_cell_length_c                    11.832(9) 
_cell_angle_alpha                 111.259(12) 
_cell_angle_beta                  101.514(15) 
_cell_angle_gamma                 99.885(16) 
_cell_volume                      1192(2) 
_cell_formula_units_Z             1 
_cell_measurement_temperature     200(2) 
_cell_measurement_reflns_used     1772 
_cell_measurement_theta_min       3.55 
_cell_measurement_theta_max       27.36 
  
_exptl_crystal_description        block 
_exptl_crystal_colour             blue 
_exptl_crystal_size_max           0.30 
_exptl_crystal_size_mid           0.23 
_exptl_crystal_size_min           0.21 
_exptl_crystal_density_meas       ? 
_exptl_crystal_density_diffrn     1.205 
_exptl_crystal_density_method     'not measured' 
_exptl_crystal_F_000              451 
_exptl_absorpt_coefficient_mu     0.595 
_exptl_absorpt_correction_type    multi-scan 
_exptl_absorpt_correction_T_min   0.8416 
_exptl_absorpt_correction_T_max   0.8852 
_exptl_absorpt_process_details    'SADABS, Bruker (2003)' 
  
_exptl_special_details 
; 
 Data collection is performed with four batch runs at phi = 0.00 deg 
 (600 frames), at phi = 90.00 deg (600 frames), at phi = 180.00 deg 
 (600 frames), and at phi = 270.00 deg (600 frames). 
 A fifth batch run is collected at phi = 0.00 deg (50 frames) to monitor 
 crystal and diffractometer stability. Frame width = 0.30 deg in omega. 
 Data is merged, corrected for decay (if any), and treated with multi-scan 
 absorption corrections (if required). All symmetry-equivalent reflections 
 are merged for centrosymmetric data. 
 Friedel pairs are not merged for noncentrosymmetric data. 
; 
  
_diffrn_ambient_temperature       200(2) 
_diffrn_radiation_wavelength      0.71073 
_diffrn_radiation_type            MoK\a 
_diffrn_radiation_source          'fine-focus sealed tube' 
_diffrn_radiation_monochromator   graphite 
_diffrn_measurement_device_type   'Bruker APEX-II CCD' 
_diffrn_measurement_method        '\f and \w scans' 
_diffrn_detector_area_resol_mean  ? 
_diffrn_reflns_number             4886 
_diffrn_reflns_av_R_equivalents   0.0539 
_diffrn_reflns_av_sigmaI/netI     0.0991 
_diffrn_reflns_limit_h_min        -11 
_diffrn_reflns_limit_h_max        11 
_diffrn_reflns_limit_k_min        -11 
_diffrn_reflns_limit_k_max        13 
_diffrn_reflns_limit_l_min        -13 
_diffrn_reflns_limit_l_max        13 
_diffrn_reflns_theta_min          3.55 
_diffrn_reflns_theta_max          24.71 
_reflns_number_total              3718 
_reflns_number_gt                 2407 
_reflns_threshold_expression      >2sigma(I) 
  
_computing_data_collection        'APEX II, Bruker (2009)' 
_computing_cell_refinement        'APEX II, Bruker (2009)' 
_computing_data_reduction         'XPREP, Bruker (2009)' 
_computing_structure_solution     'SHELXS-97 (Sheldrick, 2008)' 
_computing_structure_refinement   'SHELXL-97 (Sheldrick, 2008)' 
_computing_molecular_graphics     'SHELXTL, Bruker (2004)' 
_computing_publication_material   'SHELXTL, Bruker (2004)' 
  
_refine_special_details 
; 
 Refinement of F^2^ against ALL reflections.  The weighted R-factor wR and 
 goodness of fit S are based on F^2^, conventional R-factors R are based 
 on F, with F set to zero for negative F^2^. The threshold expression of 
 F^2^ > 2sigma(F^2^) is used only for calculating R-factors(gt) etc. and is 
 not relevant to the choice of reflections for refinement.  R-factors based 
 on F^2^ are statistically about twice as large as those based on F, and R- 
 factors based on ALL data will be even larger. 
; 
  
_refine_ls_structure_factor_coef  Fsqd 
_refine_ls_matrix_type            full 
_refine_ls_weighting_scheme       calc 
_refine_ls_weighting_details 
 'calc w=1/[\s^2^(Fo^2^)+(0.1616P)^2^]' 
_atom_sites_solution_primary      direct 
_atom_sites_solution_secondary    difmap 
_atom_sites_solution_hydrogens    geom 
_refine_ls_hydrogen_treatment     constr 
_refine_ls_extinction_method      none 
_refine_ls_extinction_coef        ? 
_refine_ls_number_reflns          3718 
_refine_ls_number_parameters      230 
_refine_ls_number_restraints      9 
_refine_ls_R_factor_all           0.1181 
_refine_ls_R_factor_gt            0.0861 
_refine_ls_wR_factor_ref          0.2608 
_refine_ls_wR_factor_gt           0.2317 
_refine_ls_goodness_of_fit_ref    1.021 
_refine_ls_restrained_S_all       1.021 
_refine_ls_shift/su_max           0.001 
_refine_ls_shift/su_mean          0.000 
  
loop_ 
 _atom_site_label 
 _atom_site_type_symbol 
 _atom_site_fract_x 
 _atom_site_fract_y 
 _atom_site_fract_z 
 _atom_site_U_iso_or_equiv 
 _atom_site_adp_type 
 _atom_site_occupancy 
 _atom_site_symmetry_multiplicity 
 _atom_site_calc_flag 
 _atom_site_refinement_flags 
 _atom_site_disorder_assembly 
 _atom_site_disorder_group 
Cr1 Cr 0.0000 0.5000 0.0000 0.0504(4) Uani 1 2 d S . . 
Al1 Al -0.03930(17) 0.79302(18) 0.1103(2) 0.0651(6) Uani 1 1 d . . . 
Cl1 Cl -0.12766(14) 0.61374(15) 0.13754(18) 0.0712(6) Uani 1 1 d . . . 
Cl2 Cl -0.0858(2) 0.6927(2) -0.0995(2) 0.0980(8) Uani 1 1 d . . . 
N1 N 0.1614(4) 0.8254(4) 0.1759(5) 0.0506(11) Uani 1 1 d . . . 
P1 P 0.21894(12) 0.69686(13) 0.11845(14) 0.0451(4) Uani 1 1 d . . . 
C1 C 0.3348(6) 0.6722(5) 0.2436(6) 0.0533(14) Uani 1 1 d . . . 
C2 C 0.2702(7) 0.6319(6) 0.3232(7) 0.0729(19) Uani 1 1 d . . . 
H2A H 0.1686 0.6173 0.3093 0.087 Uiso 1 1 calc R . . 
C3 C 0.3516(9) 0.6127(8) 0.4218(8) 0.088(2) Uani 1 1 d . . . 
H3A H 0.3050 0.5858 0.4745 0.105 Uiso 1 1 calc R . . 
C4 C 0.4960(9) 0.6317(7) 0.4438(8) 0.086(2) Uani 1 1 d . . . 
H4A H 0.5504 0.6173 0.5110 0.103 Uiso 1 1 calc R . . 
C5 C 0.5650(7) 0.6723(6) 0.3683(8) 0.082(2) Uani 1 1 d . . . 
H5A H 0.6668 0.6865 0.3846 0.098 Uiso 1 1 calc R . . 
C6 C 0.4885(6) 0.6917(6) 0.2716(7) 0.0628(17) Uani 1 1 d . . . 
H6A H 0.5381 0.7191 0.2208 0.075 Uiso 1 1 calc R . . 
C7 C 0.3306(5) 0.7173(5) 0.0147(6) 0.0518(14) Uani 1 1 d . . . 
C8 C 0.4140(5) 0.6352(5) -0.0296(6) 0.0571(15) Uani 1 1 d . . . 
H8A H 0.4187 0.5689 -0.0017 0.069 Uiso 1 1 calc R . . 
C9 C 0.4886(7) 0.6473(7) -0.1115(7) 0.075(2) Uani 1 1 d . . . 
H9A H 0.5474 0.5919 -0.1381 0.090 Uiso 1 1 calc R . . 
C10 C 0.4787(8) 0.7408(8) -0.1563(8) 0.083(2) Uani 1 1 d . . . 
H10A H 0.5297 0.7486 -0.2148 0.100 Uiso 1 1 calc R . . 
C11 C 0.3947(8) 0.8231(8) -0.1161(8) 0.082(2) Uani 1 1 d . . . 
H11A H 0.3876 0.8866 -0.1476 0.098 Uiso 1 1 calc R . . 
C12 C 0.3212(6) 0.8127(6) -0.0302(6) 0.0616(16) Uani 1 1 d . . . 
H12A H 0.2646 0.8697 -0.0017 0.074 Uiso 1 1 calc R . . 
C13 C 0.2539(6) 0.9549(5) 0.2808(7) 0.0622(17) Uani 1 1 d . . . 
C36 C 0.4163(6) 0.9788(6) 0.2934(8) 0.074(2) Uani 1 1 d . . . 
H36A H 0.4525 0.9143 0.3155 0.111 Uiso 1 1 calc R . . 
H36B H 0.4676 1.0637 0.3599 0.111 Uiso 1 1 calc R . . 
H36C H 0.4326 0.9739 0.2129 0.111 Uiso 1 1 calc R . . 
C15 C 0.2000(7) 1.0591(6) 0.2501(8) 0.075(2) Uani 1 1 d . . . 
H15A H 0.2566 1.1430 0.3156 0.112 Uiso 1 1 calc R . . 
H15B H 0.0976 1.0480 0.2473 0.112 Uiso 1 1 calc R . . 
H15C H 0.2113 1.0527 0.1677 0.112 Uiso 1 1 calc R . . 
C16 C 0.2280(9) 0.9613(8) 0.4084(8) 0.092(2) Uani 1 1 d . . . 
H16A H 0.2619 0.8948 0.4284 0.137 Uiso 1 1 calc R . . 
H16B H 0.1245 0.9480 0.4011 0.137 Uiso 1 1 calc R . . 
H16C H 0.2814 1.0450 0.4759 0.137 Uiso 1 1 calc R . . 
C17 C -0.1692(8) 0.9008(9) 0.1471(11) 0.099(3) Uani 1 1 d . . . 
H17A H -0.1340 0.9767 0.1315 0.119 Uiso 1 1 calc R . . 
H17B H -0.2655 0.8537 0.0855 0.119 Uiso 1 1 calc R . . 
C18 C -0.1886(11) 0.9454(12) 0.2743(13) 0.134(4) Uani 1 1 d . . . 
H18A H -0.2572 0.9978 0.2796 0.201 Uiso 1 1 calc R . . 
H18B H -0.0954 0.9961 0.3370 0.201 Uiso 1 1 calc R . . 
H18C H -0.2264 0.8719 0.2912 0.201 Uiso 1 1 calc R . . 
C19 C 0.019(2) 0.5951(9) 0.5538(15) 0.077(7) Uiso 0.25 1 d PGDU A -1 
C20 C 0.0712(15) 0.5119(12) 0.5992(12) 0.031(4) Uiso 0.25 1 d PGDU A -1 
H20A H 0.1281 0.5426 0.6846 0.037 Uiso 0.25 1 calc PR A -1 
C21 C 0.040(2) 0.3836(11) 0.5196(18) 0.078(8) Uiso 0.25 1 d PGU A -1 
H21A H 0.0754 0.3267 0.5506 0.094 Uiso 0.25 1 calc PR A -1 
C22 C -0.043(2) 0.3386(11) 0.3947(17) 0.090(9) Uiso 0.25 1 d PGU A -1 
H22A H -0.0646 0.2509 0.3404 0.108 Uiso 0.25 1 calc PR A -1 
C23 C -0.095(2) 0.4218(18) 0.3494(13) 0.080(8) Uiso 0.25 1 d PGU A -1 
H23A H -0.1518 0.3911 0.2640 0.096 Uiso 0.25 1 calc PR A -1 
C24 C -0.064(2) 0.5501(16) 0.4289(17) 0.088(8) Uiso 0.25 1 d PGDU A -1 
H24A H -0.0991 0.6070 0.3979 0.106 Uiso 0.25 1 calc PR A -1 
C25 C 0.063(11) 0.734(2) 0.636(4) 0.14(3) Uiso 0.25 1 d PDU A -1 
H25A H 0.1231 0.7499 0.7201 0.210 Uiso 0.25 1 calc PR A -1 
H25B H -0.0233 0.7643 0.6447 0.210 Uiso 0.25 1 calc PR A -1 
H25C H 0.1188 0.7805 0.5983 0.210 Uiso 0.25 1 calc PR A -1 
  
loop_ 
 _atom_site_aniso_label 
 _atom_site_aniso_U_11 
 _atom_site_aniso_U_22 
 _atom_site_aniso_U_33 
 _atom_site_aniso_U_23 
 _atom_site_aniso_U_13 
 _atom_site_aniso_U_12 
Cr1 0.0359(6) 0.0443(8) 0.0514(9) 0.0071(6) 0.0115(5) -0.0084(5) 
Al1 0.0335(8) 0.0539(11) 0.0955(16) 0.0227(11) 0.0132(8) 0.0052(7) 
Cl1 0.0419(7) 0.0606(10) 0.0955(14) 0.0210(9) 0.0229(8) -0.0040(6) 
Cl2 0.0629(10) 0.1117(16) 0.0933(16) 0.0253(13) 0.0034(10) 0.0183(10) 
N1 0.035(2) 0.040(2) 0.059(3) 0.008(2) 0.011(2) -0.0032(18) 
P1 0.0315(6) 0.0399(8) 0.0511(9) 0.0119(7) 0.0089(6) -0.0035(5) 
C1 0.041(3) 0.039(3) 0.066(4) 0.017(3) 0.007(3) -0.003(2) 
C2 0.058(3) 0.066(4) 0.081(5) 0.033(4) 0.003(3) -0.003(3) 
C3 0.091(5) 0.091(5) 0.075(5) 0.050(5) 0.000(4) -0.003(4) 
C4 0.088(5) 0.067(5) 0.082(6) 0.035(4) -0.012(4) 0.001(4) 
C5 0.051(3) 0.059(4) 0.108(6) 0.025(4) -0.010(4) 0.002(3) 
C6 0.037(3) 0.056(4) 0.082(5) 0.028(3) 0.002(3) -0.001(2) 
C7 0.032(2) 0.052(3) 0.056(4) 0.015(3) 0.007(2) -0.005(2) 
C8 0.035(2) 0.047(3) 0.071(4) 0.010(3) 0.017(3) -0.004(2) 
C9 0.049(3) 0.063(4) 0.091(6) 0.012(4) 0.026(4) -0.003(3) 
C10 0.060(4) 0.095(6) 0.081(5) 0.031(5) 0.026(4) -0.005(4) 
C11 0.069(4) 0.092(5) 0.091(6) 0.054(5) 0.024(4) 0.001(4) 
C12 0.051(3) 0.062(4) 0.068(4) 0.028(3) 0.017(3) 0.000(3) 
C13 0.048(3) 0.039(3) 0.075(5) 0.004(3) 0.016(3) -0.006(2) 
C36 0.043(3) 0.046(3) 0.095(5) 0.005(4) 0.000(3) -0.010(2) 
C15 0.056(3) 0.049(4) 0.097(6) 0.018(4) 0.011(3) -0.002(3) 
C16 0.090(5) 0.074(5) 0.065(5) -0.003(4) 0.020(4) -0.020(4) 
C17 0.055(4) 0.091(6) 0.131(8) 0.028(6) 0.019(5) 0.021(4) 
C18 0.086(6) 0.115(8) 0.157(11) 0.023(8) 0.043(7) -0.017(5) 
  
_geom_special_details 
; 
 All esds (except the esd in the dihedral angle between two l.s. planes) 
 are estimated using the full covariance matrix.  The cell esds are taken 
 into account individually in the estimation of esds in distances, angles 
 and torsion angles; correlations between esds in cell parameters are only 
 used when they are defined by crystal symmetry.  An approximate (isotropic) 
 treatment of cell esds is used for estimating esds involving l.s. planes. 
; 
  
loop_ 
 _geom_bond_atom_site_label_1 
 _geom_bond_atom_site_label_2 
 _geom_bond_distance 
 _geom_bond_site_symmetry_2 
 _geom_bond_publ_flag 
Cr1 Cl1 2.407(2) 2_565 ? 
Cr1 Cl1 2.407(2) . ? 
Cr1 P1 2.574(3) 2_565 ? 
Cr1 P1 2.574(3) . ? 
Al1 N1 1.878(5) . ? 
Al1 C17 1.941(8) . ? 
Al1 Cl2 2.236(4) . ? 
Al1 Cl1 2.286(3) . ? 
N1 C13 1.539(7) . ? 
N1 P1 1.656(5) . ? 
P1 C1 1.820(6) . ? 
P1 C7 1.849(6) . ? 
C1 C2 1.403(10) . ? 
C1 C6 1.433(8) . ? 
C2 C3 1.387(10) . ? 
C3 C4 1.349(13) . ? 
C4 C5 1.384(12) . ? 
C5 C6 1.351(10) . ? 
C7 C8 1.392(9) . ? 
C7 C12 1.407(8) . ? 
C8 C9 1.356(10) . ? 
C9 C10 1.387(11) . ? 
C10 C11 1.387(11) . ? 
C11 C12 1.385(10) . ? 
C13 C15 1.536(10) . ? 
C13 C36 1.533(9) . ? 
C13 C16 1.557(11) . ? 
C17 C18 1.466(15) . ? 
C19 C20 1.3900 . ? 
C19 C24 1.3900 . ? 
C19 C25 1.49(2) . ? 
C20 C21 1.3900 . ? 
C21 C22 1.3900 . ? 
C22 C23 1.3900 . ? 
C23 C24 1.3900 . ? 
  
loop_ 
 _geom_angle_atom_site_label_1 
 _geom_angle_atom_site_label_2 
 _geom_angle_atom_site_label_3 
 _geom_angle 
 _geom_angle_site_symmetry_1 
 _geom_angle_site_symmetry_3 
 _geom_angle_publ_flag 
Cl1 Cr1 Cl1 180.0 2_565 . ? 
Cl1 Cr1 P1 87.35(11) 2_565 2_565 ? 
Cl1 Cr1 P1 92.65(11) . 2_565 ? 
Cl1 Cr1 P1 92.66(11) 2_565 . ? 
Cl1 Cr1 P1 87.35(11) . . ? 
P1 Cr1 P1 180.0 2_565 . ? 
N1 Al1 C17 131.4(3) . . ? 
N1 Al1 Cl2 105.54(19) . . ? 
C17 Al1 Cl2 109.0(4) . . ? 
N1 Al1 Cl1 102.46(17) . . ? 
C17 Al1 Cl1 107.5(3) . . ? 
Cl2 Al1 Cl1 94.88(12) . . ? 
Al1 Cl1 Cr1 89.91(9) . . ? 
C13 N1 P1 125.7(4) . . ? 
C13 N1 Al1 121.8(4) . . ? 
P1 N1 Al1 112.2(2) . . ? 
N1 P1 C1 111.6(3) . . ? 
N1 P1 C7 109.6(3) . . ? 
C1 P1 C7 106.2(3) . . ? 
N1 P1 Cr1 109.32(17) . . ? 
C1 P1 Cr1 108.18(18) . . ? 
C7 P1 Cr1 111.92(19) . . ? 
C2 C1 C6 115.4(6) . . ? 
C2 C1 P1 118.0(4) . . ? 
C6 C1 P1 126.6(5) . . ? 
C3 C2 C1 121.4(6) . . ? 
C4 C3 C2 120.9(8) . . ? 
C3 C4 C5 119.9(7) . . ? 
C6 C5 C4 120.5(6) . . ? 
C5 C6 C1 121.9(7) . . ? 
C8 C7 C12 118.6(6) . . ? 
C8 C7 P1 122.5(5) . . ? 
C12 C7 P1 118.7(4) . . ? 
C9 C8 C7 121.7(6) . . ? 
C8 C9 C10 119.8(7) . . ? 
C9 C10 C11 120.2(7) . . ? 
C12 C11 C10 120.0(7) . . ? 
C11 C12 C7 119.7(7) . . ? 
C15 C13 C36 108.7(5) . . ? 
C15 C13 C16 109.1(6) . . ? 
C36 C13 C16 109.4(6) . . ? 
C15 C13 N1 107.5(5) . . ? 
C36 C13 N1 114.1(5) . . ? 
C16 C13 N1 107.9(5) . . ? 
C18 C17 Al1 118.0(8) . . ? 
C20 C19 C24 120.0 . . ? 
C20 C19 C25 119.8(8) . . ? 
C24 C19 C25 120.0(8) . . ? 
C21 C20 C19 120.0 . . ? 
C22 C21 C20 120.0 . . ? 
C21 C22 C23 120.0 . . ? 
C22 C23 C24 120.0 . . ? 
C23 C24 C19 120.0 . . ? 
  
loop_ 
 _geom_torsion_atom_site_label_1 
 _geom_torsion_atom_site_label_2 
 _geom_torsion_atom_site_label_3 
 _geom_torsion_atom_site_label_4 
 _geom_torsion 
 _geom_torsion_site_symmetry_1 
 _geom_torsion_site_symmetry_2 
 _geom_torsion_site_symmetry_3 
 _geom_torsion_site_symmetry_4 
 _geom_torsion_publ_flag 
N1 Al1 Cl1 Cr1 -61.65(19) . . . . ? 
C17 Al1 Cl1 Cr1 157.1(3) . . . . ? 
Cl2 Al1 Cl1 Cr1 45.46(10) . . . . ? 
Cl1 Cr1 Cl1 Al1 -75(12) 2_565 . . . ? 
P1 Cr1 Cl1 Al1 -135.82(8) 2_565 . . . ? 
P1 Cr1 Cl1 Al1 44.18(8) . . . . ? 
C17 Al1 N1 C13 2.0(7) . . . . ? 
Cl2 Al1 N1 C13 136.0(4) . . . . ? 
Cl1 Al1 N1 C13 -125.2(4) . . . . ? 
C17 Al1 N1 P1 176.4(5) . . . . ? 
Cl2 Al1 N1 P1 -49.6(3) . . . . ? 
Cl1 Al1 N1 P1 49.2(3) . . . . ? 
C13 N1 P1 C1 42.9(5) . . . . ? 
Al1 N1 P1 C1 -131.2(3) . . . . ? 
C13 N1 P1 C7 -74.5(5) . . . . ? 
Al1 N1 P1 C7 111.4(3) . . . . ? 
C13 N1 P1 Cr1 162.5(4) . . . . ? 
Al1 N1 P1 Cr1 -11.6(3) . . . . ? 
Cl1 Cr1 P1 N1 152.7(2) 2_565 . . . ? 
Cl1 Cr1 P1 N1 -27.3(2) . . . . ? 
P1 Cr1 P1 N1 45(10) 2_565 . . . ? 
Cl1 Cr1 P1 C1 -85.6(2) 2_565 . . . ? 
Cl1 Cr1 P1 C1 94.4(2) . . . . ? 
P1 Cr1 P1 C1 167(10) 2_565 . . . ? 
Cl1 Cr1 P1 C7 31.1(2) 2_565 . . . ? 
Cl1 Cr1 P1 C7 -148.9(2) . . . . ? 
P1 Cr1 P1 C7 -77(10) 2_565 . . . ? 
N1 P1 C1 C2 71.6(5) . . . . ? 
C7 P1 C1 C2 -169.0(5) . . . . ? 
Cr1 P1 C1 C2 -48.7(6) . . . . ? 
N1 P1 C1 C6 -107.4(6) . . . . ? 
C7 P1 C1 C6 12.0(6) . . . . ? 
Cr1 P1 C1 C6 132.3(5) . . . . ? 
C6 C1 C2 C3 0.0(10) . . . . ? 
P1 C1 C2 C3 -179.1(6) . . . . ? 
C1 C2 C3 C4 -0.4(13) . . . . ? 
C2 C3 C4 C5 0.7(13) . . . . ? 
C3 C4 C5 C6 -0.7(12) . . . . ? 
C4 C5 C6 C1 0.3(11) . . . . ? 
C2 C1 C6 C5 0.0(9) . . . . ? 
P1 C1 C6 C5 179.0(5) . . . . ? 
N1 P1 C7 C8 168.6(4) . . . . ? 
C1 P1 C7 C8 48.0(5) . . . . ? 
Cr1 P1 C7 C8 -69.9(5) . . . . ? 
N1 P1 C7 C12 -17.1(5) . . . . ? 
C1 P1 C7 C12 -137.8(4) . . . . ? 
Cr1 P1 C7 C12 104.4(4) . . . . ? 
C12 C7 C8 C9 1.8(8) . . . . ? 
P1 C7 C8 C9 176.1(5) . . . . ? 
C7 C8 C9 C10 -2.2(9) . . . . ? 
C8 C9 C10 C11 1.0(11) . . . . ? 
C9 C10 C11 C12 0.5(11) . . . . ? 
C10 C11 C12 C7 -0.8(10) . . . . ? 
C8 C7 C12 C11 -0.3(8) . . . . ? 
P1 C7 C12 C11 -174.8(5) . . . . ? 
P1 N1 C13 C15 145.2(5) . . . . ? 
Al1 N1 C13 C15 -41.2(7) . . . . ? 
P1 N1 C13 C36 24.5(8) . . . . ? 
Al1 N1 C13 C36 -161.9(5) . . . . ? 
P1 N1 C13 C16 -97.3(6) . . . . ? 
Al1 N1 C13 C16 76.3(6) . . . . ? 
N1 Al1 C17 C18 -65.0(9) . . . . ? 
Cl2 Al1 C17 C18 162.1(6) . . . . ? 
Cl1 Al1 C17 C18 60.4(7) . . . . ? 
C24 C19 C20 C21 0.0 . . . . ? 
C25 C19 C20 C21 -175(6) . . . . ? 
C19 C20 C21 C22 0.0 . . . . ? 
C20 C21 C22 C23 0.0 . . . . ? 
C21 C22 C23 C24 0.0 . . . . ? 
C22 C23 C24 C19 0.0 . . . . ? 
C20 C19 C24 C23 0.0 . . . . ? 
C25 C19 C24 C23 175(6) . . . . ? 
  
_diffrn_measured_fraction_theta_max    0.913 
_diffrn_reflns_theta_full              24.71 
_diffrn_measured_fraction_theta_full   0.913 
_refine_diff_density_max    0.813 
_refine_diff_density_min   -0.521 
_refine_diff_density_rms    0.096 

				#===END
